# Supplementary material for: Using Quantitative Methods to Detect Financial Statement Manipulation for SMEs in an emerging market: Case of Albania
Source: Research Square preprint supplement (doi:10.21203/rs.3.rs-6307042/v1), 2025-04-23
Supplement: Supplementary file 1 [file 8360f1b73eb3d82ad5293097.xlsx]

## Sheet: Sheet1
								1.a Marzhet e fitimit	1.b raportet e perfitueshmerise										2. Raportet e likuiditetit					3. Raportet e aftësisë paguese									4. raportet e qarkullimit									4. Raportet e qarkullimit shtese		5a. Analiza strukturore e aktiveve
				Fitimi Bruto/Shitje sipas natyres	EBIT/Shitje sipas natyres	EBT/Shitje sipas natyres	Fitimi Neto/Shitje sipas natyres	Fitimi Neto/Fitimi Bruto sipas natyres	Fitimi Bruto/ Aktive Totale sipas natyres	EBIT/Aktive Totale sipas natyres	EBT/Aktive Totale sipas natyres	Fitimi Neto/Aktive Totale sipas natyres	EBT/Aktive Afatgjata materiale sipas natyres	Fitimi Neto/Aktivet Fikse sipas natyres	EBT/Kapitali sipas natyres	Fitimi Neto/Kapitali sipas natyres	EBT/Detyrime Afatshkurtra sipas natyres	Fitim i pashpërndarë/Fitim Neto) sipas natyres	Raporti korent	Raporti i shpejtë	Inventar/DASH	Mjete monetare/Detyrime Totale	Raporti likuid	Detyrime totale/Aktive totale	Hua Totale/Aktive totale	Hua AGJ/Aktive Totale	DASH/Aktive totale	Kapitali/Aktive Totale	Detyrime Totale/Kapital	Hua totale/Kapital	Hua Afatgjatë/Kapital	Aktive Afatgjata Materiale/DAGJ	Inventar/Shitje sipas natyres	KMSH/Inventar	LLA/Shitje sipas natyres	Shitje/Aktive Fikse sipas natyres	Shitje/Aktive Totale sipas natyres	Shitje/Kapital sipas natyres	Shitje/Detyrime Totale sipas natyres	KMSH/Shitje sipas natyres	Shp.Operative/Shitje sipas natyre	KMSH/LLP	Shitje/kapital punues sipas natyres	Aktive Fikse/Aktive Totale	AASH/Aktive Totale	Inv+LLA/Aktive totale	Inv/Aktive Totale	LLA/Aktive Totale	Mjete monetare/Aktive Totale
				Te ardhura totale - Kmsh/TR totale	Fitim humbja para tatimit+Shp financiare/TR totale	Fitim humbja para tatimit/TR totale	Fitimi i vitit/Shitje totale	Fitimi i vitit/Te ardhura totale - Kmsh
2022	L61920025Q	VEGA SHIP YARD DURRES	NDERTIM	0	0	0	0	0	0	0	0	0	0	0	0	0	0	0	0	1.00906	0	0.0221291	0.0245897	0.838675	0	0	0.754749	0.161325	5.19865	0	0	2.84074	0	0	0	0	0	0	0	0	0	0	0	0.0707074	0.761589	0.74303	0	0.74303	0.0185591
2023	L61920025Q	VEGA SHIP YARD DURRES	NDERTIM	0	0	0	0	0	0	0	0	0	0	0	0	0	0	0	0	1.00906	0	0.0221291	0.0245897	0.838675	0	0	0.754749	0.161325	5.19865	0	0	2.84074	0	0	0	0	0	0	0	0	0	0	0	0.0707074	0.761589	0.74303	0	0.74303	0.0185591
2022	L64710802A	LULSHAMETI	NDERTIM	0	0	0	0	0	0	0	0	0	0	0	0	0	0	0	1.00906	0.889375	0.564336	0.00260734	0.0163594	0.960151	0	0	0.153027	0.0398489	24.0948	0	0	0.96335	0	1	0	0	0	0	0	0	0	1.1851	0	0.172759	0.222458	0.133965	0.086359	0.047606	0.00250344
2023	L64710802A	LULSHAMETI	NDERTIM	0	0	0	0	0	0	0	0	0	0	0	0	0	0	0	1.00906	0.898355	0.518279	0.00257093	0.0150243	0.960693	0	0	0.164392	0.0393065	24.4411	0	0	0.96335	0	1	0	0	0	0	0	0	0	1.1851	0	0.170442	0.232883	0.132169	0.085201	0.0469677	0.00246987
2022	L43027201P	SULOVA NDERTIM PRODHIM	NDERTIM	1.11742	1.55653	0.0295227	0.0250944	0.0224574	0.0580882	0.00153204	0.00153472	0.00130451	0.00388704	0.00762061	0.00541024	0.00460673	0.00277173	190.447	1.45371	1.0961	0	0.000901914	0.00116965	0.716825	0.164241	0.164085	0.552739	0.283175	2.53138	0.579998	0.579448	2.40206	0	0	11.4155	0.303678	0.0519843	0.183576	0.0725202	0	-0.905214	0	0.978647	0.171182	0.605858	0.605211	0	0.605211	0.000646514
2023	L43027201P	SULOVA NDERTIM PRODHIM	NDERTIM	1.18406	1.36487	0.0306854	0.0224744	0.0189808	0.100239	0.00259593	0.00259774	0.00190262	0.00660238	0.00978515	0.00929636	0.00681354	0.00463512	128.558	1.41663	1.07443	0.00906832	0.00266831	0.00343396	0.720759	0.160728	0.160703	0.560056	0.279241	2.58113	0.57559	0.5755	2.44663	0.0599921	1	6.97599	0.435391	0.0846572	0.303169	0.117456	0.0599921	-0.785684	0.0103237	1.81031	0.194439	0.60682	0.604896	0.00507876	0.599818	0.00192321
2022	L52402028F	SAIMIRI GRUP 1981	NDERTIMI	1.28292	-23.6909	0.175835	0.175835	0.137059	1.24862	0.156868	0.171135	0.171135	0.410988	0	0.169935	0.18539	2.04011	-1.87733	1.0961	8.04133	0	1.25046	1.25046	0.0768921	0	0	0.0768921	0.923108	0.083297	0	0	0	0	0	0.263522	0	0.97327	1.05434	12.6576	0	-0.52659	0	1.79762	0	0.618315	0.522164	0	0.522164	0.0961505
2023	L52402028F	SAIMIRI GRUP 1981	NDERTIMI	1.52474	0	0.136386	0.136386	0.089449	1.24105	0.11101	0.11101	0.11101	0.31754	0	0.116058	0.116058	2.55248	-1.2388	1.0835	14.9549	0	0.634572	0.634572	0.0434912	0	0	0.0434912	0.956509	0.0454687	0	0	0	0	0	0.225652	0	0.813941	0.850949	18.7151	0	-0.338875	0	1.34112	0	0.650405	0.622806	0	0.622806	0.0275983
2022	J82916439P	MUSTAFAJ	NDERTIM	1.59323	0.7148	0.0504651	0.0428954	0.0269236	0.226326	0.00716884	0.00716884	0.00609352	0.0420197	0.543296	0.0505116	0.0429349	0.00835456	13.4024	8.04133	0.682613	0.283961	0.231374	0.231374	0.858075	0	0	0.858075	0.141925	6.04599	0	0	0	1.71524	0.049812	2.72568	12.6656	0.142055	1.00092	0.165551	0.0854398	-0.356309	7.82235	-4.95275	0.0112158	0.829393	0.630857	0.24366	0.387197	0.198536
2023	J82916439P	MUSTAFAJ	NDERTIM	1.0732	-4.79459	0.263217	0.263217	0.245264	0.0628301	0.0151992	0.01541	0.01541	0.0897306	1.39284	0.0978005	0.0991571	0.0179959	5.59837	14.9549	0.607135	0.376316	0.184516	0.184516	0.84459	0	0	0.84459	0.15541	5.4346	0	0	0	5.42889	0.154233	5.90743	5.2916	0.0585448	0.376712	0.0693174	0.837314	-0.659984	22.6541	-4.18876	0.0110637	0.830613	0.674773	0.317833	0.35694	0.15584
2021	J87602809S	NGRACAN 1934	NDERTIM	0	0	0	0	0	0	0	0	0	0	0	0	0	0	0	0.966574	1.15632	0.445792	0.508529	0.508529	0.560123	0	0	0.560123	0.439877	1.27336	0	0	0	0	0	0	0	0	0	0	0	0	0	0	0	0.897382	0.612544	0.249699	0.362845	0.284839
2022	J87602809S	NGRACAN 1934	NDERTIM	0	1.09043	0.0326142	0.027722	0	0	0.098933	0.098933	0.084093	0.701963	0	0.138722	0.117914	0.344922	0	0.983452	1.58893	1.40612	0.333873	0.333873	0.286827	0	0	0.286827	0.713173	0.402184	0	0	0	0.132956	0	0.118672	0	3.03343	4.25343	10.5758	0	-0.133293	0	5.30103	0	0.859062	0.763299	0.403314	0.359984	0.0957639
2021	K72412009E	Bonus shkp	NDERTIM	1.59397	-0.914743	0.0110251	0.0110251	0.00691673	1.46837	0.00720832	0.0101563	0.0101563	0.0187386	0	0.0448705	0.0632214	0.00925903	12.6912	1.60212	0.756779	0.0335978	0.0037343	0.00402611	0.839353	0.0608353	0.0608353	0.778518	0.160647	5.22482	0.378689	0.378689	6.32326	0.0283938	0.745309	0.636157	0	0.921206	5.73434	1.09752	0.0211621	-0.384777	0.0444156	-5.6448	0	0.615322	0.612188	0.0261565	0.586031	0.0031344
2022	K72412009E	Bonus shkp	NDERTIM	1.54647	-0.260377	0.0118852	0.0118852	0.00768538	1.16802	0.00348866	0.00897671	0.00897671	0.0125147	0	0.0254003	0.0653579	0.00423024	12.2484	2.99505	0.636787	0.237762	0.0106443	0.0111343	0.862653	0.0379587	0.0379587	0.824694	0.137347	6.28083	0.276371	0.276371	7.34387	0.259613	0.104772	0.683152	0	0.755282	5.49908	0.875534	0.0272003	-0.439143	0.0472731	-7.30036	0	0.721236	0.712054	0.196081	0.515972	0.00918235
2021	K81314023A	MARTINI KONSTRUKSION	NDERTIM	1.62553	0.718968	0.0333156	0.0279702	0.0172067	1.63335	0.0322097	0.0334758	0.0281046	0.16364	0.538052	0.176789	0.154258	0.0393854	4.33608	0.790377	0.786073	0.195584	0.0529647	0.0529647	0.817808	0.017055	0	0.817808	0.182192	4.4887	0.0936095	0	0	0.159185	1	0.510754	19.2367	1.00481	5.51508	1.22866	0.159185	-0.340061	0.549192	-66.981	0.052234	0.802806	0.759491	0.15995	0.599541	0.0433149
2022	K81314023A	MARTINI KONSTRUKSION	NDERTIM	1.5415	0.723219	0.039568	0.0333331	0.0216238	1.40658	0.0356596	0.0361047	0.0304156	0.176178	0.352361	0.196917	0.167959	0.0536094	4.07765	0.87455	1.02886	0.169877	0.254815	0.313708	0.818911	0.205705	0.153736	0.665175	0.181089	4.52213	1.13593	0.848951	1.31659	0.123837	0.50465	0.467137	10.5709	0.912474	5.03881	1.11425	0.0624944	-0.426529	0.203345	6.90255	0.0863195	0.797368	0.588698	0.112998	0.4757	0.208671
2022	J87311735O	"XHANI" SHPK	NDERTIM	1.88376	0.969832	0.0432697	0.0432697	0.0229699	0.768836	0.0176601	0.0176601	0.0176601	1.08287	0	0.0185498	0.0185498	0.368212	0	0.981657	15.5516	4.95831	3.28507	3.28507	0.0479617	0	0	0.0479617	0.952038	0.0503779	0	0	0	0.582666	1	0	0	0.40814	0.428701	8.50969	0.582666	-0.0729742	0	0.436173	0	0.983691	0.826134	0.237809	0.588324	0.157558
2023	J87311735O	"XHANI" SHPK	NDERTIM	1.90754	1	0.0510492	0.0510492	0.0267618	0.717047	0.0191895	0.0191895	0.0191895	1.2534	0	0.0210197	0.0210197	0.220386	0	1.19874	8.50947	2.79946	1.70437	1.70437	0.0870719	0	0	0.0870719	0.912928	0.0953766	0	0	0	0.648451	1	1.5763	0	0.375902	0.411754	4.31714	0.648451	-0.0398197	17.2206	0.418777	0	0.98469	0.836288	0.243754	0.592534	0.148403
2021	J77207215P	K & N	NDERTIM	1.25498	-0.826712	0.0766417	0.0650269	0.0518149	2.47344	0.151053	0.151053	0.128161	1.11154	0	0.158031	0.134082	3.42091	0	20.5099	16.5583	3.0112	5.70011	5.70011	0.0441557	0	0	0.0441557	0.955844	0.0461955	0	0	0	0.0674627	0	0.242481	0	1.9709	2.06194	44.6351	0	-0.668375	0	2.40368	0	0.864105	0.612413	0.132962	0.479451	0.251693
2022	J77207215P	K & N	NDERTIM	1.20321	-1.3698	0.0914994	0.0776894	0.0645687	2.20872	0.167965	0.167965	0.142614	1.56475	0	0.173135	0.147004	5.62449	0	11.3089	27.0612	2.83041	12.5894	12.5894	0.0298631	0	0	0.0298631	0.970137	0.0307824	0	0	0	0.0460452	0	0.235427	0	1.8357	1.8922	61.4703	0	-0.705295	0	2.12762	0	0.892657	0.516698	0.084525	0.432173	0.375959
2021	J82916489E	C O L O M B O	NDERTIMI	1.5448	0.630296	0.131112	0.110436	0.0714892	6.13679	0.494124	0.52085	0.438714	7.01558	0	0.942116	0.836468	1.03913	-0.062019	19.5695	1.95486	0	0.458077	0.458077	0.475516	0	0	0.475516	0.524484	0.906637	0	0	0	0	0	0.00884641	0	3.97255	7.57422	8.35419	0	-0.317363	0	8.74913	0	0.929568	0.711745	0	0.711745	0.217823
2022	J82916489E	C O L O M B O	NDERTIMI	1.50332	0.907463	0.135981	0.115	0.0764972	2.48206	0.218082	0.224512	0.18987	2.67443	0	0.777959	0.67732	0.30303	0	29.8916	1.27621	0	0.00844721	0.00844721	0.719674	0	0	0.719674	0.280326	2.56727	0	0	0	0	0	0.0102049	0	1.65105	5.88976	2.29417	0	-0.356809	0	8.30582	0	0.918457	0.912377	0	0.912377	0.00607924
2021	K64020002C	Cons	NDERTIM	1.45754	0.741088	0.119801	0.119801	0.082194	0.668496	0.0549464	0.0549464	0.0549464	0.0765773	0	0.0846476	0.0846476	0.702952	0	1.95486	2.57675	1.03702	0.0682035	0.306163	0.350881	0.272715	0.272715	0.0781652	0.649119	0.540549	0.420131	0.420131	2.63105	0.176735	1	0.384984	0	0.458648	0.70657	1.30713	0.176735	-0.422663	1.13766	2.2449	0	0.282472	0.25854	0.0810592	0.177481	0.0239313
2022	K64020002C	Cons	NDERTIM	1.50533	1	0.0849889	0.0849889	0.0564586	0.339332	0.0191582	0.0191582	0.0191582	0.0251434	0	0.0270416	0.0270416	0.171639	0	1.27621	1.43058	0.702045	0.265248	0.692778	0.291529	0.270407	0.17991	0.111619	0.708471	0.41149	0.381677	0.25394	4.23523	0.347626	1	0.365331	0	0.22542	0.318178	0.773234	0.347626	-0.409678	0	1.78306	0	0.238042	0.160715	0.0783617	0.0823529	0.0773274
2021	L11331015S	Sakuli	NDERTIMI	1.60364	0.648204	0.119834	0.10209	0.0636617	1.33583	0.0882222	0.0998221	0.0850412	0.120026	0.26071	0.326201	0.31444	0.339506	1.82458	3.61378	0.933059	0.086647	0.0355396	0.0997781	0.729547	0.241739	0.191958	0.259854	0.270453	2.6975	0.89383	0.709764	1.56491	0.0270295	0.988495	0.252568	2.55373	0.833001	3.08002	1.14181	0.0267185	-0.269501	0.109365	162.677	0.32619	0.264975	0.239047	0.0225156	0.216532	0.0259278
2022	L11331015S	Sakuli	NDERTIMI	1.52775	0.718385	0.128687	0.109026	0.0713638	0.898322	0.0632059	0.0756682	0.0641076	0.0883317	0.206697	0.196742	0.199548	0.257153	3.56269	2.13263	0.992374	0.164901	0.0280018	0.0773252	0.678736	0.186697	0.153623	0.245791	0.321264	2.11271	0.581132	0.478183	1.65275	0.0689303	0.993923	0.38092	1.89585	0.588003	1.83028	0.86632	0.0685114	-0.327409	0.201576	15.2108	0.310153	0.284448	0.265442	0.0405312	0.224911	0.0190058
2022	K17621104C	Fled shpk	NDERTIM	1.82528	0.861404	0.024996	0.0211193	0.0115704	1.60981	0.0160818	0.0220453	0.0186262	0.10693	1.45594	0.100675	0.116603	0.0207993	0	1.01971	0.998294	0.100538	0.011419	0.0124096	0.84026	0.127288	0.0228847	0.773189	0.15974	5.26017	0.796845	0.143262	2.24234	0.0881393	0.969878	0.864303	68.9392	0.881954	5.52118	1.04962	0.0854844	-0.144379	0.117866	11.5415	0.0127932	0.849605	0.84001	0.0777348	0.762275	0.00959496
2023	K17621104C	Fled shpk	NDERTIM	1.84386	0.882588	0.025362	0.0212821	0.0115422	1.65061	0.0194399	0.0227039	0.0190516	0.125843	1.82007	0.125258	0.122756	0.0250207	0	1.15728	0.971815	0.116444	0.011078	0.0120454	0.844802	0.0796872	0.0195046	0.77695	0.155198	5.44338	0.513455	0.125676	2.27668	0.101063	0.986739	0.832998	85.5211	0.895193	5.76807	1.05965	0.0997231	-0.127141	0.129542	13.0546	0.0104675	0.845523	0.836165	0.0904711	0.745693	0.0093587
2022	L81708001V	ROLANDGLASS	NDERTIMI	1.61847	0.867018	0.0957609	0.0808689	0.0499663	1.88136	0.111316	0.111316	0.0940047	0.146864	0.21722	0.638258	0.539001	3.83452	0.354532	1.09883	4.5571	3.7809	0.0236139	0.671565	0.825594	0.313501	0.313501	0.0290299	0.174406	4.73376	1.79754	1.79754	0.951522	0.0944218	0.998053	0.0297524	2.68607	1.16243	6.66512	1.408	0.094238	-0.28577	8.00625	5.45689	0.432763	0.242051	0.221608	0.109759	0.111849	0.0194955
2023	L81708001V	ROLANDGLASS	NDERTIMI	1.53535	0.796485	0.125996	0.105744	0.068873	1.66931	0.136989	0.136989	0.11497	0.193865	0.318611	0.841774	0.70647	0.579191	0	1.08826	0.875914	0.364486	0.20386	0.721653	0.837261	0.406642	0.178943	0.236519	0.162739	5.14481	2.49874	1.09957	1.17625	0.0792895	0.965235	0.0314819	3.01304	1.08725	6.68095	1.29858	0.0765329	-0.338657	0	19.1219	0.360848	0.293378	0.122494	0.0862076	0.0362862	0.170684
2022	L87902701F	MALESIA	NDERTIM	1.94092	0.979144	0.013315	0.0113178	0.00583114	9.90749	0.067967	0.067967	0.057772	0.418357	0	0.0770997	0.0655348	0.573788	0	8.338	5.53718	1.53345	4.19524	4.19524	0.118453	0.059353	0	0.118453	0.881547	0.13437	0.0673283	0	0	0.0355845	0	0.0225851	0	5.10454	5.79043	43.0933	0	-0.0457681	0	7.09866	0	0.837538	0.340599	0.181642	0.158956	0.49694
2023	L87902701F	MALESIA	NDERTIM	1.94403	0.981076	0.017028	0.0144738	0.00744526	7.8911	0.0691192	0.0691192	0.0587513	0.628421	0	0.0942106	0.080079	0.259521	0.324017	1.2404	2.77337	0.568351	1.7425	1.7425	0.266333	0.0300147	0	0.266333	0.733667	0.363017	0.0409105	0	0	0.0372913	0	0.0578854	0	4.05915	5.53269	15.2409	0	-0.0389458	0	6.50841	0	0.890011	0.401288	0.151371	0.249917	0.464087
2020	L81521037L	STEVENSVILLE ENGIENEERING	NDERTIM	1.54525	0.898822	0.355769	0.350263	0.22667	2.22617	0.508104	0.512538	0.504607	1.78457	0	0.820054	0.81441	1.3357	0.254386	7.07063	0.234674	1.64565	0.17713	0.17713	0.380402	0	0	0.380402	0.619598	0.61395	0	0	0	0.434532	1	0	0	1.44065	2.32514	3.78718	0.434532	-0.0958996	2.24924	4.30202	0	0.71528	0.647899	0.626009	0.0218898	0.0673808
2021	L81521037L	STEVENSVILLE ENGIENEERING	NDERTIM	1.82005	0.894515	0.0326191	0.0277262	0.0152338	1.37363	0.0246183	0.0246183	0.0209256	0.0693949	0	0.132116	0.112298	0.0302562	1.25353e-05	3.34172	0.582885	0.210127	0.101837	0.101837	0.813661	0	0	0.813661	0.186339	4.36657	0	0	0	0.226537	1	0.518616	0	0.75472	4.05026	0.927561	0.226537	-0.14733	0.218443	-4.48123	0	0.645243	0.562382	0.170972	0.39141	0.0828606
2022	M22030022O	2E GROUP	NDERTIM	1.67809	-0.0268285	-0.52753	-0.52753	-0.314363	0.468578	-0.147304	-0.147304	-0.147304	-40.4085	0	-0.476779	-0.476779	-0.553481	0	1.88032	1.36125	0.668102	0.0119846	0.0311184	0.691044	0	0	0.266141	0.308956	2.23671	0	0	0.00857929	0.636777	0	1.2	0	0.279233	0.903795	0.404074	0	-0.834556	0	1.01927	0	0.540095	0.531813	0.177809	0.354004	0.00828188
2023	M22030022O	2E GROUP	NDERTIM	1.48321	0.664645	0.266755	0.24176	0.162998	1.12498	0.199789	0.202328	0.18337	0.771745	0	0.753745	0.691802	0.318254	-0.20262	0.793012	0.491007	0.506242	0.0324954	0.038043	0.734939	0	0	0.627765	0.265061	2.77271	0	0	2.41552	0.418997	0	0.0417508	0	0.75848	2.86153	1.03203	0	-0.246689	0	-439.188	0	0.626038	0.490907	0.317801	0.173106	0.0238821
2021	L82505601P	ANGEL	NDERTIMI	1.90002	0.971287	0.00691706	0.00582391	0.00306518	12.6631	0.0460138	0.0461001	0.0388147	0.0913214	1.61423	0.250977	0.21171	0.0563438	3.15214	2.02936	0.421226	0.185621	0.14532	0.14532	0.816661	0	0	0.816661	0.183339	4.45438	0	0	0	0.0227452	0	0.0331242	277.173	6.6647	36.3518	8.16092	0	-0.0937059	0	-20.7576	0.0240453	0.495589	0.376912	0.15159	0.225322	0.118677
2022	L82505601P	ANGEL	NDERTIMI	1.91863	0.973419	0.00287909	0.00243349	0.00126835	14.4943	0.055092	0.0217502	0.0183839	0.114539	0.776625	0.27362	0.0913057	0.068981	8.7485	0.997249	0.477069	0.172448	0.0896383	0.0896383	0.798655	0	0	0.798655	0.201345	3.9666	0	0	0	0.0182309	0	0.039148	319.14	7.55455	37.5204	9.45908	0	-0.0829089	0	-26.9887	0.0236715	0.51874	0.441196	0.137726	0.30347	0.0715901
2022	J98624801V	" BEQIRI " Sh.p.k	NDERTIM	1.52782	0.764374	0.0696441	0.0586519	0.0383892	1.35907	0.0619513	0.0619517	0.0521736	0.403973	0	0.129552	0.109105	0.118725	0	0.606848	1.61038	0.0121565	0.14311	0.14311	0.521803	0	0	0.521803	0.478197	1.09119	0	0	0	0.00713091	1	0.793309	0	0.889546	1.86021	1.70476	0.00713091	-0.402868	0.0159384	2.7384	0	0.846645	0.77197	0.00634327	0.765627	0.074675
2023	J98624801V	" BEQIRI " Sh.p.k	NDERTIM	1.61404	0.866013	0.0533824	0.0453179	0.0280774	2.00919	0.0657846	0.0664517	0.0564128	0.508688	0	0.143714	0.123241	0.121317	0	0.649516	1.531	0.0746597	0.193311	0.193311	0.542255	0	0	0.542255	0.457745	1.18462	0	0	0	0.0325223	0	0.582709	0	1.24482	2.71947	2.29564	0	-0.332793	0	3.79031	0	0.870678	0.765854	0.0404846	0.725369	0.104824
2021	K17529207A	EURO - BRAHAJ	Shoqeri Koncensionare	1.42168	-0.469527	-0.400897	-0.400897	-0.281988	0.124755	-0.0351795	-0.0351795	-0.0351795	-0.0564336	-0.139306	-0.0612184	-0.0612184	-0.0827081	-6.77408	1.62254	0.853586	0.0318637	0.0826424	0.0826424	0.425345	0	0	0.425345	0.574655	0.740174	0	0	0	0.154447	1	0	0.347486	0.0877518	0.152703	0.206308	0.154447	-0.979218	0.036672	-1.80103	0.252533	0.376622	0.34147	0.013553	0.327917	0.0351515
2022	K17529207A	EURO - BRAHAJ	Shoqeri Koncensionare	0	0	0	0	0	0	-0.103265	-0.103265	-0.103265	-0.165464	-0.404593	-0.216248	-0.216248	-0.197647	-1.98809	1.60566	0.634334	0.0851507	0	0	0.52247	0	0	0.52247	0.47753	1.09411	0	0	0	0	1	0	0	0	0	0	0	0	0.118911	0	0.255231	0.375909	0.375909	0.0444887	0.33142	0
2021	L21926005F	SOLEIL & SEA	Shoqeri Koncensionare	1.16923	1.08395	0.00899407	0.00727773	0.00622438	0.254215	0.00172249	0.0019555	0.00158233	0.00447555	0.00531748	0.274478	0.252144	0.00577833	2.12818	0.88545	1.63402	0.429525	0.111988	0.373321	0.993724	0.69563	0.69563	0.298095	0.00627553	158.349	110.848	110.848	0.553264	0.5889	0.0266822	0.849756	0.73065	0.217421	34.6459	0.218794	0.0157132	-0.820704	0	0.685789	0.297572	0.615133	0.503848	0.128039	0.375809	0.111285
2022	L21926005F	SOLEIL & SEA	Shoqeri Koncensionare	1.39495	1.44576	0.0238647	0.0198397	0.0142226	0.231175	0.00414479	0.00395493	0.0032879	0.00623467	0.00575399	0.432618	0.343179	0.0125594	1.50961	0.719485	0.551434	0.279976	0.0909883	0.273069	0.990419	0.695506	0.660405	0.330014	0.00958072	103.376	72.5944	68.9307	1.00665	0.557534	0.00228397	0.495656	0.290023	0.165723	17.2976	0.167326	0.00127339	-0.582332	0	-2.97866	0.571413	0.274377	0.184261	0.0923961	0.0918645	0.0901165
2021	L71507037J	NEW OPPORTUNITIES	Shoqeri Koncensionare	1.75444	1.2108	0.0257516	0.0218888	0.0124763	4.82286	0.0707898	0.0707898	0.0601713	0.193637	0	0.577631	0.490986	0.0874234	0.652904	2.06355	0.665201	0.11829	0.0050447	0.00546656	0.877448	0	0	0.809735	0.122552	7.15981	0	0	5.39894	0.0348437	1	0.183886	0	2.74895	22.4309	3.13289	0.0348437	-0.219813	0.127916	-15.6801	0	0.63442	0.629994	0.0957835	0.53421	0.00442647
2022	L71507037J	NEW OPPORTUNITIES	Shoqeri Koncensionare	1.53073	1.12472	0.0115303	0.00980077	0.00640266	3.4811	-0.0342141	0.0262216	0.0222883	-0.116288	0	-0.261998	0.170675	-0.0393532	3.9434	0.831411	0.198625	0.613167	0.13185	0.13185	0.869411	0	0	0.869411	0.130589	6.6576	0	0	0	0.234416	1	0	0	2.27414	17.4145	2.61572	0.234416	-0.43116	0.681877	-13.898	0	0.70578	0.591149	0.533094	0.0580548	0.114632
2021	K31721019N	EUROKONTAKT	Shoqeri Koncensionare	1.39684	1.38694	0.052794	0.0434629	0.0311153	0.209144	-0.00139473	0.00790468	0.00650757	-0.00264684	0.0220235	-0.0528854	0.246754	-0.00181044	-2.68235	0.783491	0.418101	0.195952	0.00179387	0.00226713	0.973627	0.203244	0.203244	0.770384	0.0263727	36.918	7.70658	7.70658	2.59267	1.00822	0	1.29091	0.506719	0.149727	5.67733	0.153782	0	-0.48826	0	-0.503576	0.295483	0.473057	0.358124	0.150958	0.207166	0.00174656
2022	K31721019N	EUROKONTAKT	Shoqeri Koncensionare	1.33029	1.45731	-0.0679623	-0.0679623	-0.0510883	0.15427	-0.00245755	-0.00788138	-0.00788138	-0.00487257	-0.0274679	-0.138625	-0.444572	-0.00277006	1.34889	0.811792	0.379498	0.179163	0.00209665	0.00232136	0.982272	0.0950884	0.0950884	0.887184	0.017728	55.4079	5.36374	5.36374	5.30416	1.37065	0	2.06724	0.404164	0.115967	6.54146	0.11806	0	-0.784441	0	-0.296175	0.28693	0.495635	0.407508	0.15895	0.248558	0.00205948
2022	L41525007G	ABI CONS	Shoqeri Koncensionare	0	0	0	0	0	0	0	0	0	0	0	0	0	0	0	0.614053	4.74678	1.56205	0.11778	0.179403	0.212904	0.0731304	0.0731304	0.139774	0.787096	0.270494	0.0929117	0.0929117	1.61615	0	1	0	0	0	0	0	0	0	2.92881	0	0	0.88181	0.856734	0.218334	0.638401	0.0250758
2021	L41525007G	ABI CONS	Shoqeri Koncensionare	0	0	0	0	0	0	0	0	0	0	0	0	0	0	0	0.558661	2.44556	0.209249	0.00197803	0.00286171	0.516656	0.15954	0.15954	0.357116	0.483344	1.06892	0.330075	0.330075	0.325461	0	1	0	0	0	0	0	0	0	0.231264	0	0	0.948076	0.947054	0.0747262	0.872328	0.00102196
2021	K03816401O	ABG NDERTIM	Shoqeri Koncensionare	1.50145	0.820336	0.242651	0.189344	0.126107	0.875918	0.141595	0.141558	0.11046	12.0141	0	0.211295	0.164833	0.429249	3.19347	6.30883	2.77091	0.22488	0.000780723	0.000780723	0.329868	0	0	0.329868	0.670132	0.492242	0	0	0	0.127156	1	0.961682	0	0.58338	0.870545	1.76853	0.127156	-0.25596	1.6574	0.886129	0	0.988214	0.987957	0.0741806	0.913776	0.000257535
2022	K03816401O	ABG NDERTIM	Shoqeri Koncensionare	1.66768	0.804753	0.1233	0.103514	0.0620706	0.869258	0.0666286	0.0642684	0.0539554	8.24491	0	0.11159	0.0903651	0.165365	6.95798	2.65481	2.28429	0.177548	0.00793586	0.00793586	0.402918	0	0	0.402918	0.597082	0.674812	0	0	0	0.137246	1	0.917644	0	0.521237	0.872974	1.29365	0.137246	-0.213545	0.730933	0.884952	0	0.991919	0.919797	0.0715375	0.848259	0.0031975
2021	L01410008B	FINPEK PETROLEUM	Shoqeri Koncensionare	1.41719	0.414037	0.289917	0.289917	0.204572	0.235722	0.0482222	0.0482222	0.0482222	0.0577237	2.10259	-0.65493	-0.65493	0.203424	-1.88124	2.99579	0.437938	0.205425	0.0889947	0.403063	1.07363	0	0	0.237053	-0.0736295	-14.5815	0	0	0.998589	0.29277	0	0.0201541	7.25239	0.166331	-2.25902	0.154924	0	-0.292896	0	-1.96744	0.0229346	0.152511	0.0569638	0.0486966	0.00826715	0.0955473
2022	L01410008B	FINPEK PETROLEUM	Shoqeri Koncensionare	1.92542	0.17419	0.0183045	0.0183045	0.00950676	1.07031	0.0101752	0.0101752	0.0101752	0.0131512	0.484089	-0.177561	-0.177561	0.0348112	-8.171	2.46184	0.458781	0.277497	0.122735	0.443961	1.05731	0	0	0.292296	-0.0573051	-18.4504	0	0	1.01137	0.145914	0	0.00699665	26.4464	0.555883	-9.70041	0.525755	0	-0.0562735	0	-7.2113	0.0210192	0.215211	0.0854428	0.0811111	0.00433164	0.129768
2021	K07924803N	SHENDELLI	Shoqeri Koncensionare	1.85222	0.776094	0.0472324	0.0401169	0.0216589	2.83608	0.0477177	0.0723213	0.0614263	0.287631	0.622758	0.122352	0.157501	0.0866806	0.937449	0.643363	1.5014	0.0135022	0.0784965	0.0869797	0.609995	0.126854	0	0.550501	0.390005	1.56407	0.325262	0	2.78851	0.00485442	1	0.457596	15.5236	1.53118	3.92605	2.51016	0.00485442	-0.084483	0.0226753	5.40182	0.0986359	0.833957	0.786075	0.007433	0.778642	0.0478824
2022	K07924803N	SHENDELLI	Shoqeri Koncensionare	1.57207	0.869462	0.0243855	0.0201624	0.0128254	2.23709	0.0416699	0.0347011	0.0286915	0.304534	0.399637	0.137016	0.0943414	0.0660779	3.17804	0.736277	1.25595	0.112707	0.00207232	0.00228677	0.695876	0.139368	0.000112282	0.630618	0.304124	2.28813	0.458262	0.000369198	2.09679	0.0499464	0.522945	0.513581	19.8209	1.42302	4.67908	2.04494	0.0261192	-0.406718	0.0914615	6.12099	0.0717939	0.8631	0.861658	0.0710748	0.790584	0.00144208
2022	J71317005O	SONA	Shoqeri Koncensionare	0	-54.257	0	0	-30.1073	0.00413971	-0.145306	-0.124636	-0.124636	-15.4057	0	-0.147202	-0.126263	-11.276	-5.31787	1.51491	64.0888	4.04522	5.00114	5.00114	0.0128862	0	0	0.0128862	0.987114	0.0130545	0	0	0	0	0.515194	0	0	0	0	0	0	0	2.17005	0	0	0.877992	0.717155	0.0521277	0.665027	0.0644458
2022	J71317005O	SONA	Shoqeri Koncensionare	0	-54.257	0	0	-30.1073	0.00413971	-0.145306	-0.124636	-0.124636	-15.4057	0	-0.147202	-0.126263	-11.276	-5.31787	1.36866	64.0888	4.04522	5.00114	5.00114	0.0128862	0	0	0.0128862	0.987114	0.0130545	0	0	0	0	0.515194	0	0	0	0	0	0	0	2.17005	0	0	0.877992	0.717155	0.0521277	0.665027	0.0644458
2020	K32125001P	BIG - MARKET		0	0.942132	0	0	0.0387649	2.89989	0.133844	0.133844	0.112414	2.33154	0	0.6441	0.540972	0.168952	0	68.1341	0.365392	0.824452	0.114209	0.114209	0.7922	0	0	0.7922	0.2078	3.81232	0	0	0	0	0	0	0	0	0	0	0	0	0	0	0	0.942594	0.852118	0.65313	0.198988	0.0904762
2021	K32125001P	BIG - MARKET		0	0.943388	0	0	0.0734519	3.15453	0.275541	0.275541	0.231706	4.07768	0	0.842318	0.708316	0.409496	0	68.1341	0.492333	0.893397	0.0917812	0.0917812	0.672878	0	0	0.672878	0.327122	2.05696	0	0	0	0	0	0	0	0	0	0	0	0	0	0	0	0.932427	0.87067	0.601147	0.269522	0.0617575
2021	J61826509U	Albanian Travel and Hospitality Service"(A.T.H.S.)		0	0	0	0	0	0	0.0306356	0.0503465	0.0503465	1.77735	0	0.091331	0.150093	0.0460987	3.62042	1.18984	1.47881	0	0.0125283	0.0125283	0.664565	0.59527	0	0.664565	0.335435	1.9812	1.77462	0	0	0	0	0	0	0	0	0	0	0	0	0	0	0.982763	0.974437	0	0.974437	0.0083259
2022	J61826509U	Albanian Travel and Hospitality Service"(A.T.H.S.)		0	0	0	0	0	0	0.146604	0.146604	0.135775	6.44953	0	0.253636	0.234901	0.347412	2.25879	1.38573	2.31586	0	0.114981	0.114981	0.42199	0.301985	0	0.42199	0.57801	0.730074	0.522457	0	0	0	0	0	0	0	0	0	0	0	0	0	0	0.977269	0.928748	0	0.928748	0.0485208
2021	K81917006T	LEL-Medical		0	0.673102	0	0	1.86419	0.151819	0.33261	0.332964	0.283019	8.23659	0	0.35475	0.301858	5.32948	2.05662	1.47881	15.3761	0	14.5558	14.5558	0.0624095	0	0	0.0624095	0.93759	0.0665638	0	0	0	0	0	0	0	0	0	0	0	0	0	0	0	0.959618	0.0511965	0	0.0511965	0.908421
2022	K81917006T	LEL-Medical		0	0	0	0	0	0	0	0	0	0	0	0	0	0	0	2.31586	215.604	0	192.277	192.277	0.00448085	0	0	0.00448085	0.995519	0.00450102	0	0	0	0	0	0	0	0	0	0	0	0	0	0	0	0.96609	0.104526	0	0.104526	0.861564
2021	K74727401G	Green Farm shpk		1.29828	0.265818	0.0778397	0.0660228	0.0508542	0.354482	0.0206656	0.0212534	0.0180269	0.0548646	0.0653473	0.417747	0.364407	0.0217411	0	15.3761	0.31734	0.338435	0.0813515	0.0813515	0.950531	0.00111632	0	0.950531	0.0494692	19.2146	0.0225659	0	0	1.17819	0.0425631	0.821542	0.989769	0.273041	5.51941	0.287251	0.0501472	-0.621731	0.0612849	-0.834486	0.275863	0.623334	0.546007	0.321693	0.224314	0.0773271
2022	K74727401G	Green Farm shpk		1.26412	-0.221815	0.0776918	0.0642475	0.0508237	0.264579	0.0191228	0.0162608	0.0134469	0.0499347	0.0475706	0.297585	0.209257	0.0204361	0	215.604	0.25502	0.404397	0.000530158	0.000530158	0.93574	0.0153168	0	0.93574	0.06426	14.5618	0.238357	0	0	1.808	0.0560558	1.1364	0.740428	0.209298	3.25705	0.223671	0.101349	-0.671858	0.0870313	-0.656731	0.282672	0.617043	0.616547	0.37841	0.238137	0.00049609
2021	L71312503F	MIRA & SEBASTIAN CORPORATION		1.59406	0.914721	0.0874467	0.0739528	0.0463929	1.53272	0.0667788	0.084082	0.0711073	0.917311	0	0.238492	0.253951	0.117378	0	0.655775	0.177688	1.44913	0.0590442	0.0747232	0.719996	0.296975	0.151076	0.56892	0.280004	2.57138	1.06061	0.539548	0.481868	0.857433	0.0218786	0.0130324	0	0.961523	3.43396	1.33546	0.0187595	-0.300502	0.104346	2.69628	0	0.925531	0.883019	0.824441	0.0585785	0.0425116
2022	L71312503F	MIRA & SEBASTIAN CORPORATION		1.40845	0.809502	0.0485644	0.0412304	0.0292737	1.29994	0.02806	0.0448232	0.0380542	0.578845	0	0.106892	0.144963	0.0563749	0	0.659417	0.381863	1.52749	0.0509243	0.0754535	0.737491	0.390455	0.239751	0.49774	0.262509	2.80939	1.4874	0.913303	0.202193	0.823753	0	0.120489	0	0.922963	3.51593	1.25149	0	-0.524827	0	2.03915	0	0.950363	0.912806	0.760294	0.152513	0.0375562
2021	K49322506W	KLIMA TEKNIKA TB2 SHPK		0	0	0	0	0	0	0	0	0	0	0	0	0	0	0	1.62682	0.601439	0.562751	0.220252	0.266225	0.857911	0.0593458	0.0584444	0.70976	0.142089	6.03784	0.417666	0.411322	1.17211	0	0	0	0	0	0	0	0	0	0	0	0.059764	0.826296	0.636815	0.399418	0.237396	0.188956
2022	K49322506W	KLIMA TEKNIKA TB2 SHPK		0	0	0	0	0	0	0	0	0	0	0	0	0	0	0	1.90935	0.420917	0.86315	0.12626	0.159983	0.818064	0.0363686	0.0328927	0.645624	0.181936	4.49643	0.199897	0.180793	0.991229	0	0	0	0	0	0	0	0	0	0	0	0.0521078	0.829024	0.725274	0.55727	0.168004	0.103289
2021	K52526202I	A&M TEKSTIL SHPK		1.61175	-1.6608	-0.172433	-0.172433	-0.106985	1.42353	-0.150569	-0.152296	-0.152296	-0.914131	-1.55043	0.962199	0.973233	-0.143539	0	1.16419	0.124311	0.671974	0.00020586	0.000226958	1.15648	0.0718488	0	1.04898	-0.156485	-7.39041	-0.459143	0	1.53215	0.798088	0.283305	0.13286	8.99151	0.88322	-5.64413	0.763711	0.226102	-0.55552	1.53399	-4.13312	0.0982282	0.835287	0.835049	0.704887	0.130162	0.000238074
2022	K52526202I	A&M TEKSTIL SHPK		1.43002	-1.5355	-0.0674997	-0.0674997	-0.0472021	0.954118	-0.041825	-0.0450364	-0.0450364	-0.242171	-0.519469	0.228364	0.245898	-0.036798	0	1.28407	0.126936	0.600922	0.000165544	0.000172322	1.18315	0.052722	0	1.13661	-0.183151	-6.45998	-0.287861	0	3.71095	1.02369	0.18751	0.215946	7.69587	0.667208	-3.64295	0.563925	0.191952	-0.63586	0.62958	-2.15702	0.0866969	0.827291	0.827095	0.683014	0.144081	0.000195863
2021	K21915002R	A.E. DISTRIBUTION		1.73756	-2.44979	0.0383105	0.0325639	0.0187412	1.66857	-0.0188877	0.0367893	0.0312709	-0.067481	0.341033	-0.038045	0.0629881	-0.0399331	0	0.796285	0.952218	0.570248	0.0560563	0.0596779	0.503542	0.0305575	0.0305575	0.472985	0.496458	1.01427	0.0615511	0.0615511	9.15966	0.280871	0.98998	0.369358	10.4727	0.960293	1.93429	1.90707	0.278057	-0.166148	0.567564	3.88596	0.0916946	0.720103	0.62441	0.269719	0.354691	0.0282267
2022	K21915002R	A.E. DISTRIBUTION		1.69134	3.59704	0.0295969	0.0251574	0.0148742	1.2862	-0.0566867	0.0225074	0.0191313	-0.247651	0.257488	-0.134517	0.0453983	-0.113085	0	0.727858	0.968215	0.570061	0.0515316	0.0594795	0.57859	0.0773133	0.0773133	0.501277	0.42141	1.37299	0.183463	0.183463	2.96065	0.375768	0.808837	0.519867	10.2351	0.760465	1.80457	1.31434	0.303935	-0.174926	0.483155	2.81836	0.0742999	0.771102	0.681099	0.285758	0.39534	0.0298157
2021	L32203043A	ADON		1.15273	0	0.660213	0.560123	0.485911	0.451197	0.256139	0.258419	0.219241	47.1593	0	0.27226	0.23304	4.32578	0.858044	1.52247	16.7967	0	14.0384	14.0384	0.0592122	0	0	0.0592122	0.940788	0.0629389	0	0	0	0	0	0.404341	0	0.391417	0.416052	6.61041	0	-0.181235	0	0.418468	0	0.994569	0.163324	0	0.163324	0.831245
2022	L32203043A	ADON		1.13532	0	0.70968	0.603228	0.531328	0.558071	0.348845	0.348845	0.296518	27.0493	0	0.351145	0.298473	53.2653	0	1.53828	150.721	0	150.119	150.119	0.0065492	0	0	0.0065492	0.993451	0.00659238	0	0	0	0	0	0.000403747	0	0.491552	0.494793	75.0553	0	-0.154996	0	0.5013	0	0.987103	0.0039466	0	0.0039466	0.983157
2021	L52230020G	DAS OIL		1.88613	0.958203	0.000310411	-0.000183202	-9.71316e-05	1.34624	-0.000384254	0.000221559	-0.000130763	-0.00194384	-0.00105396	-0.20451	-0.0695952	-0.000624417	-10.801	16.7967	1.25846	0.0442755	0.00360936	0.00585424	0.998121	0.382742	0.382742	0.61538	0.0018789	531.226	203.705	203.705	0.516478	0.0381729	0	0.234743	5.75301	0.71376	379.881	0.715104	0	-0.112716	0	3.83129	0.124067	0.801677	0.641782	0.0272463	0.614535	0.00360258
2022	L52230020G	DAS OIL		1.94045	0.966784	0.000134275	6.52289e-05	3.36153e-05	2.01439	8.06996e-05	0.000139392	6.77146e-05	0.000401727	0.000549888	0.0417568	0.0350378	0.000125726	27.5401	150.721	1.20025	0.0437426	0.00622225	0.00967523	0.998067	0.414876	0.356199	0.641868	0.00193261	516.434	214.671	184.31	0.56396	0.0270464	0	0.181649	8.43012	1.03811	537.152	1.04012	0	-0.0593586	0	6.62864	0.123143	0.798478	0.638365	0.028077	0.610288	0.00621023
2021	L71905014T	ART-TECH		0	0.874322	0	0	0.308201	0.122213	0.0443951	0.0443951	0.0376663	5.06651	0	0.743501	0.630812	4.41836	0	1.30274	27.3348	71.3166	0.170454	15.9513	0.940289	0.0747012	0.0747012	0.0100479	0.0597109	15.7474	1.25105	1.25105	0.00941956	0	0.00333301	0	0	0	0	0	0	0	0.53024	0	0	0.991238	0.830961	0.716581	0.11438	0.160276
2022	L71905014T	ART-TECH		0	0.985608	0	0	0.254319	2.43158	0.727645	0.727645	0.618398	9.14295	0	1.08718	0.923951	7.66586	0	1.24399	9.29781	0.398906	0.65158	2.27011	0.330703	0.116864	0.116864	0.0949203	0.669297	0.494105	0.174607	0.174607	0.337537	0	0.36372	0	0	0	0	0	0	0	0.781597	0	0	0.920415	0.704935	0.0378643	0.667071	0.21548
2021	J62904138T	BUJARI		1.70246	0.883634	0.0546849	0.0463174	0.0272061	0.618046	0.0167455	0.0198523	0.0168146	0.109318	0.203728	0.0565747	0.0568083	0.0793963	0	98.6514	0.269257	3.74582	0.0338044	0.112838	0.704011	0.115162	0.115162	0.21091	0.295989	2.37851	0.389074	0.389074	0.310648	2.17621	0.308323	0.0108352	4.39853	0.36303	1.2265	0.515659	0.670976	-0.234294	1.18821	0.570883	0.0825345	0.846819	0.813156	0.79003	0.0231258	0.0237987
2022	J62904138T	BUJARI		1.69728	0.835753	0.0586563	0.0498517	0.0293715	0.501743	0.0123905	0.0173397	0.0147369	0.0805099	0.187523	0.0426964	0.0507819	0.0479506	0	9.69671	0.125575	3.14878	0.00721701	0.0198243	0.7098	0.0881154	0.0881154	0.258402	0.2902	2.44589	0.303636	0.303636	0.340942	2.75239	0.338938	0.010267	3.76163	0.295616	1.01866	0.416478	0.932891	-0.227321	1.08614	0.503007	0.0785872	0.8461	0.831495	0.813651	0.0178445	0.00512263
2021	K72002014B	OKTAPUS 1 SECURITY		1.45178	0	0.0712056	0.0604425	0.0416335	0.592434	0.0290573	0.0290573	0.0246651	0.0522188	0.432052	0.770328	0.653889	0.0301963	0	4.01508	0.460934	0	0.0271456	0.0271456	0.962279	0	0	0.962279	0.0377206	25.5107	0	0	0	0	0	1.02291	7.14814	0.408075	10.8184	0.424072	0	-0.475167	0	-0.786679	0.0570883	0.443547	0.417426	0	0.417426	0.0261216
2022	K72002014B	OKTAPUS 1 SECURITY		1.5076	0	0.0690879	0.0585694	0.0388495	0.508109	0.0232849	0.0232849	0.0197398	0.0497402	0.4577	0.786576	0.666822	0.0239952	0	3.27436	0.548096	0	0.00451278	0.00451278	0.970397	0	0	0.970397	0.0296028	32.7806	0	0	0	0	0	1.56511	7.81465	0.337032	11.3851	0.347314	0	-0.42136	0	-0.768556	0.0431282	0.531871	0.527491	0	0.527491	0.00437919
2021	K52213022F	IDEAL MARKET		1.803	0.932639	0.0601728	0.0509634	0.0282658	9.14903	0.299131	0.305336	0.258605	2.78315	0	0.887961	0.76766	0.451093	0	0.460934	0.535853	0.810076	0.2913	0.2913	0.663126	0	0	0.663126	0.336874	1.96847	0	0	0	0.105863	0	0.0297489	0	5.07432	15.0629	7.65213	0	-0.1356	0	22.1205	0	0.89252	0.699352	0.537182	0.16217	0.193168
2022	K52213022F	IDEAL MARKET		1.80046	0.932814	0.0707144	0.0599375	0.0332902	8.90756	0.344255	0.349852	0.296535	2.50839	0	0.945588	0.81451	0.541337	0	0.548096	0.582884	0.773793	0.346115	0.346115	0.635935	0	0	0.635935	0.364065	1.74676	0	0	0	0.099463	0	0.0304342	0	4.94739	13.5893	7.77971	0	-0.127698	0	21.8116	0	0.862759	0.642652	0.492082	0.15057	0.220106
2019	J81603502G	Ataushi (Ish-Cama)	Ndertim	0	0	0	0	0	0	-0.0357226	-0.0357201	-0.0357201	-0.482442	0	-0.051309	-0.0513054	-0.117595	0	1.34593	3.02049	0.0276633	0.604442	0.604442	0.303775	0	0	0.303775	0.696225	0.436318	0	0	0	0	0.979216	0	0	0	0	0	0	0	0.0385657	0	0	0.925955	0.74234	0.00840342	0.733937	0.183614
2020	J81603502G	Ataushi (Ish-Cama)	Ndertim	1.44652	-2.10445	-0.65588	-0.65556	-0.453199	0.0264104	-0.011975	-0.011975	-0.0119692	-0.182005	0	-0.0175226	-0.017514	-0.0378244	0	1.35668	2.91889	0.0318972	0.539148	0.539148	0.316595	0	0	0.316595	0.683405	0.463261	0	0	0	0.553101	1	19.657	0	0.0182579	0.0267161	0.0576697	0.553101	-1.2092	0.0473864	0.0295623	0	0.934205	0.763513	0.0100985	0.753415	0.170692
2021	K81321002M	A V E Consulting	Ndertim	1.18821	0	0.451892	0.383618	0.322854	0.818523	0.308053	0.311296	0.264264	2.53309	27.8608	0.538778	0.462192	0.938665	0.921178	3.04816	2.67653	0	0.296616	0.387049	0.428238	0.0215024	0.0215024	0.328182	0.571762	0.74898	0.0376073	0.0376073	1.21543	0	0	0.508864	72.6264	0.688872	1.20482	1.60862	0	-0.553212	0	1.25202	0.00948514	0.878388	0.357487	0	0.357487	0.127022
2022	K81321002M	A V E Consulting	Ndertim	1.15567	0	0.321375	0.272954	0.236186	0.398787	0.104706	0.110897	0.094188	1.44672	14.4442	0.260044	0.233923	0.196518	2.8073	2.95079	1.74103	0	0.120592	0.135202	0.597355	0.00998269	0.00998269	0.532803	0.402645	1.48358	0.0247928	0.0247928	1.12119	0	0	0.648611	52.918	0.34507	0.857007	0.577663	0	-0.50501	0	0.873988	0.00652083	0.927626	0.242725	0	0.242725	0.0720359
2020	J77304712J	Grama	Ndertim	1	0	0.014268	0.0106729	0.0106729	0.386812	0.00551904	0.00551904	0.0041284	0.0216561	0.047874	0.023508	0.0175846	0.0072123	28.5834	2.67653	0.447658	0.526107	0.219359	0.219359	0.765227	0.303441	0	0.765227	0.234773	3.25943	1.29249	0	0	1.04079	0	0.302345	4.48557	0.386812	1.6476	0.505486	0	-0.985732	0	-19.2676	0.0862347	0.745151	0.562273	0.402591	0.159682	0.167859
2021	J77304712J	Grama	Ndertim	1	0	0.241407	0.203718	0.203718	0.715321	0.172683	0.172683	0.145724	0.815988	2.03831	0.708118	0.597565	0.228376	0	1.74103	0.577993	0.464641	0.341431	0.341431	0.756138	0.20075	0	0.756138	0.243862	3.10067	0.82321	0	0	0.491154	0	0.238261	10.0055	0.715321	2.9333	0.94602	0	-0.758593	0	22.189	0.0714925	0.788375	0.530206	0.351333	0.178874	0.258169
2019	K41614010T	Bi-Servis (Ish Bi-Security)	Ndertim	1.96049	0.985564	0.00913734	0.00773026	0.00394302	2.58627	0.0120539	0.0120539	0.0101977	0.114412	0	-0.135694	-0.114799	0.0110705	-13.739	0.973765	0.821656	0	5.09115e-05	5.09115e-05	1.08883	0.0571387	0	1.08883	-0.0888313	-12.2573	-0.643227	0	0	0	0	0.668951	0	1.31919	-14.8505	1.21157	0	-0.0303719	0	-6.79344	0	0.894645	0.89459	0	0.89459	5.5434e-05
2020	K41614010T	Bi-Servis (Ish Bi-Security)	Ndertim	1.91167	0.942014	-0.00789445	-0.00856746	-0.00448167	3.92991	-0.016229	-0.016229	-0.0176125	-0.0565773	0	0.101968	0.110661	-0.0140007	11.7528	1.04263	0.586679	0.0285561	0.00307514	0.00307514	1.15916	0	0	1.15916	-0.159157	-7.2831	0	0	0	0.0161017	1	0.329072	0	2.05575	-12.9165	1.77349	0.0161017	-0.0962269	0.0287112	-4.60927	0	0.713154	0.709589	0.033101	0.676488	0.00356458
2019	K82509006P	Ardmir	Ndertim	1.04981	0.924777	0.153509	0.130482	0.124291	0.175476	0.0226844	0.025659	0.0218102	0.044013	1.1655	0.0917583	0.088222	0.0312832	5.84581	0.821656	0.618298	0.0499938	0.196702	0.204202	0.752781	0.0276511	0.0276511	0.72513	0.247219	3.045	0.111848	0.111848	18.6395	0.216882	0.591317	1.79643	8.93227	0.16715	0.676122	0.222044	0.128246	-0.778885	0.0308726	-0.69492	0.0187131	0.484598	0.336525	0.036252	0.300273	0.148073
2020	K82509006P	Ardmir	Ndertim	1.9086	0.437938	0.0238706	0.02029	0.0106308	2.02494	0.0233408	0.0253256	0.0215268	0.0404874	1.15382	0.0857543	0.0790894	0.0339118	7.03236	0.615235	0.536863	0.0784451	0.444734	0.470281	0.727818	0.0395369	0.0395369	0.688281	0.272182	2.67401	0.145259	0.145259	14.5812	0.0508903	0.865116	0.0313341	56.8663	1.06095	3.89795	1.45772	0.044026	-0.065655	0.0705557	-4.00698	0.018657	0.423504	0.0998191	0.0539922	0.0458269	0.323685
2019	K53210201F	Devolli-2005	Ndertim	1.8418	0.95695	0.0111249	-0.00242071	-0.00131432	1.00978	-0.00331626	0.00609933	-0.00132718	-0.0123023	-0.016691	-0.0272148	-0.0108914	-0.0170643	-18.6303	0.668292	1.28074	2.47783	0.0549226	0.248175	0.878145	0.1345	0	0.194339	0.121855	7.20646	1.10377	0	0.394212	0.878303	0.377685	0.366006	6.89507	0.548261	4.49928	0.62434	0.331722	-0.0518282	3.56631	1.02269	0.0795148	0.730435	0.682205	0.481539	0.200666	0.04823
2020	K53210201F	Devolli-2005	Ndertim	1.73142	0.842573	0.165964	0.140855	0.081352	1.52942	0.140493	0.146602	0.124422	0.322582	1.05546	0.676438	0.599057	0.49702	0.128516	0.615308	1.32297	0.673946	0.0192536	0.0539664	0.792304	0.066005	0	0.282671	0.207696	3.81473	0.317796	0	0.854592	0.215666	0	0.375934	7.49325	0.883334	4.25302	1.11489	0	-0.0545064	0	3.1346	0.117884	0.564472	0.549217	0.190505	0.358712	0.0152547
2021	J62903833Q	Kap	Ndertim	0	-6.57954	0	0	-13.0224	0.00276148	-0.0359611	-0.0359611	-0.0359611	-0.0397348	-0.0513422	0.0371272	0.0371272	-0.150432	0	3.75857	0.393742	0.00354249	1.23301e-05	0.000101538	1.96859	0	0	0.239053	-0.968592	-2.03243	0	0	0.523277	0	0.250123	0	0	0	0	0	0	0	0.0241429	0	0.700419	0.0949719	0.0949476	0.00084684	0.0941008	2.4273e-05
2022	J62903833Q	Kap	Ndertim	0	-10.6887	0	0	-14.4924	0.00186037	-0.0269612	-0.0269612	-0.0269612	-0.0297905	-0.038493	0.0270816	0.0270816	-0.104041	0	1.99692	0.363221	0.00326789	1.21636e-05	9.36676e-05	1.99555	0	0	0.25914	-0.995553	-2.00447	0	0	0.521205	0	0.250123	0	0	0	0	0	0	0	0.0563333	0	0.700419	0.0949719	0.0949476	0.00084684	0.0941008	2.4273e-05
2018	K26813201S	Baitel (Bojo Resort)	Ndertim	1.6055	-0.579919	0.135041	0.114645	0.0714079	1.4462	0.121642	0.121642	0.10327	0.397758	0	0.126532	0.107421	3.14746	7.97388	0.397285	14.8324	3.07093	4.16368	4.16368	0.0386475	0	0	0.0386475	0.961352	0.0402012	0	0	0	0.131757	0.468076	0.395514	0	0.900778	0.936991	23.3075	0.0616724	-0.260753	1.79902	1.37887	0	0.691921	0.476285	0.118684	0.357601	0.160916
2019	K26813201S	Baitel (Bojo Resort)	Ndertim	1.62394	-4.02316	0.130549	0.110947	0.0683194	1.74694	0.140437	0.140437	0.11935	0.435999	0	0.148931	0.126569	2.46239	6.63746	0.366489	10.0146	1.8204	0.600611	0.600611	0.0570327	0.0302976	0	0.0570327	0.942967	0.0604822	0.0321301	0	0	0.096512	0.468971	0.452917	0	1.07574	1.14081	18.8619	0.0452614	-0.205011	3.42752	1.74082	0	0.674985	0.591045	0.103822	0.487223	0.0342545
2021	M11308002L	Prime Investment Group	Ndertim	-87.1942	-99.411	115.107	115.107	-1.32012	0.0165267	-0.0218172	-0.0218172	-0.0218172	0	0	-0.026068	-0.026068	-0.133795	0	17.9034	6.13254	0	0.866205	0.866205	0.163065	0.00625663	0	0.163065	0.836935	0.194835	0.00747564	0	0	0	0	0	0	-0.000189539	-0.000226468	-0.00116236	0	25.9126	0	-0.000226468	0	1	0.858753	0	0.858753	0.141247
2022	M11308002L	Prime Investment Group	Ndertim	-63.9854	-93.0375	132.994	132.979	-2.07827	0.0114397	-0.0237774	-0.0237774	-0.0237748	0	0	-0.0239535	-0.0239509	-3.23307	1.11446	11.835	135.973	0	19.4874	19.4874	0.00735442	0	0	0.00735442	0.992646	0.00740891	0	0	0	0	0	0	0	-0.000178786	-0.00018011	-0.02431	0	67.0083	0	-0.00018011	0	1	0.856681	0	0.856681	0.143319
2021	K92223011V	Gjoni-An	Ndertim	1.5581	0.710431	0.0845965	0.0719073	0.0461507	0.285565	0.0113941	0.0155047	0.013179	0.0615385	0.1503	0.0813547	0.0940996	0.0141357	0	6.13254	0.522857	0.488059	0.0307354	0.0327906	0.859946	0.054719	0.0538986	0.806047	0.140054	6.1401	0.390699	0.384842	3.43522	2.14646	0.849749	2.15529	2.0902	0.183278	1.30862	0.213127	1.82395	-0.334879	0.555696	20.8287	0.0876846	0.814847	0.788416	0.393399	0.395017	0.0264308
2022	K92223011V	Gjoni-An	Ndertim	1.79689	0.879895	0.0667924	0.0667924	0.0371711	0.400442	0.0120634	0.0148849	0.0148849	0.0684355	0.179064	0.0816977	0.100806	0.0146604	0	135.973	0.510078	0.490984	0.0285625	0.0295861	0.852341	0.0294887	0.0294887	0.822853	0.147659	5.77237	0.199708	0.199708	5.97767	1.81289	0.860098	1.77415	2.6809	0.222853	1.50924	0.26146	1.55926	-0.11187	0.600073	255.021	0.0831262	0.823726	0.799381	0.404008	0.395374	0.024345
2021	M114105001A	Albi Stone 97	Ndertim	1.66085	0.964814	0.0755675	0.0642324	0.0386743	2.04419	0.0857037	0.0930089	0.0790576	1.00511	0	0.245471	0.226435	0.778029	0	1.01092	2.75374	5.55031	0.0872937	0.515782	0.65086	0	0	0.110155	0.34914	1.86418	0	0	0.157698	0.496742	0	0.085665	0	1.23081	3.52525	1.89105	0	-0.257643	0	1.52976	0	0.914732	0.857916	0.611394	0.246522	0.0568159
2022	M114105001A	Albi Stone 97	Ndertim	1.7069	0.972566	0.0568033	0.0482828	0.0282869	2.98852	0.0924801	0.0994541	0.0845359	1.82041	0	0.321391	0.293783	0.684951	0	1.00106	1.69901	5.33119	0.0503608	0.265666	0.712251	0	0	0.135017	0.287749	2.47525	0	0	0.0880093	0.411116	0	0	0	1.75085	6.08464	2.45819	0	-0.232315	0	2.15044	0	0.949198	0.913329	0.719802	0.193526	0.0358695
2021	K37321001L	Dedi-Ma (Ish Dedi)	Ndertim	1.76674	0.683271	0.0751136	0.0638466	0.036138	1.72075	0.0680236	0.0731581	0.0621844	0.155356	0	0.166918	0.15259	0.16578	0	8.30405	1.27798	0.0920198	0.0787694	0.113736	0.592474	0.0427717	0.0427717	0.410324	0.407526	1.45383	0.104954	0.104954	2.40383	0.0387672	0	0.476363	0	0.973966	2.38994	1.6439	0	-0.152871	0	6.41532	0	0.562142	0.515474	0.0377579	0.477716	0.0466688
2022	K37321001L	Dedi-Ma (Ish Dedi)	Ndertim	1.74009	0.663104	0.0726108	0.0617192	0.0354689	1.65053	0.0651401	0.0688734	0.0585424	0.12432	0	0.115956	0.104212	0.342039	0	7.0302	1.97221	0.527346	0.00622475	0.0143238	0.438236	0.0353903	0.0353903	0.190446	0.561764	0.780106	0.0629985	0.0629985	2.11457	0.105881	0.0644629	0.38963	0	0.948528	1.68848	2.16442	0.00682539	-0.18336	0.0387105	3.32136	0	0.476031	0.473303	0.100431	0.372872	0.00272791
2021	M11425502O	Arb Express	Ndertim	0	0	0	0	0	0	-0.118168	-0.116081	-0.116081	0	0	-0.119157	-0.117053	-14.2362	0	1.37	17.7397	0	0	0	0.00830052	0	0	0.00830052	0.991699	0.00837	0	0	0	0	0	0	0	0	0	0	0	0	0	0	0	0.147249	0.0299499	0	0.0299499	0
2022	M11425502O	Arb Express	Ndertim	1	0	0.508513	0.508513	0.508513	0.660183	0.302065	0.335711	0.335711	0	0	0.413328	0.459367	1.12214	0	2.49955	2.45278	0	1.43633	1.43633	0.269186	0	0	0.269186	0.730814	0.368338	0	0	0	0	0	0.414455	0	0.660183	0.903353	2.45251	0	-0.440523	0	1.68815	0	0.660256	0.273616	0	0.273616	0.38664
2021	L81502032O	Prodekor	Ndertim	1.50988	-0.264172	-0.65979	-0.65979	-0.436981	0.708093	-0.315364	-0.309423	-0.309423	-0.801122	0	3.30571	3.24344	-0.30227	0.292252	17.7397	0.337616	0.243555	0.00236392	0.00248192	1.0954	0.0520803	0.0520803	1.04332	-0.0953997	-11.4822	-0.545917	-0.545917	7.55857	0.541835	0	0.535331	0	0.468972	-4.91587	0.428129	0	-1.14034	0	-1.07323	0	0.606347	0.603758	0.254106	0.349652	0.00258944
2022	L81502032O	Prodekor	Ndertim	1.39202	-0.234639	-0.268379	-0.257868	-0.185247	0.741078	-0.149686	-0.142878	-0.137283	-0.373636	0	0.666916	0.611652	-0.129939	2.66115	2.45278	0.280568	0.23974	0.0212839	0.022623	1.22445	0.0724762	0.0724762	1.15197	-0.224446	-5.45542	-0.322912	-0.322912	5.52761	0.518758	0	0.53813	0	0.532374	-2.37195	0.434788	0	-0.863566	0	-0.963417	0	0.59938	0.573319	0.276174	0.297145	0.026061
2022	M11612029S	KiiZ	Ndertim	1.60936	0.993538	0.0838473	0.0725818	0.0450997	2.02552	0.105074	0.105529	0.0913504	2.57443	0	1.01495	0.882385	0.196491	0.145213	0.581171	1.67174	0.121956	0.0188303	0.0315675	0.896473	0.0154833	0.0154833	0.534755	0.103527	8.65934	0.149559	0.149559	0.112835	0.0518173	0.575395	0.696883	0	1.25859	12.1571	1.40393	0.0298154	-0.30643	0.0732993	2.96535	0	0.959185	0.942305	0.0652165	0.877088	0.0168809
2023	M11612029S	KiiZ	Ndertim	1.69149	0.986846	0.0938385	0.0799928	0.0472913	1.07183	0.0588925	0.0594615	0.050688	1.21555	0	0.477776	0.411216	0.0865973	1.32074	0.520309	1.31886	0.0803272	0.00498292	0.00642388	0.876736	0.00766927	0.00766927	0.680073	0.123264	7.11268	0.0622183	0.0622183	0.246357	0.0862112	0.439911	1.40741	0	0.633657	5.14066	0.722746	0.0379253	-0.213772	0.0359621	2.33411	0	0.951551	0.947182	0.0546284	0.892554	0.00436871
2022	M19308501D	Agron Shpk	Ndertim	1	0	1	-0.713821	-0.713821	1.83845	1.83845	1.83845	-1.31232	0	0	-1.97829	1.41214	0.952903	0	1.79369	0.51832	0	0.101305	0.101305	1.92931	0	0	1.92931	-0.929312	-2.07607	0	0	0	0	0	0	0	1.83845	-1.97829	0.952903	0	0	0	-1.97829	0	1	0	0	0	0.19545
2023	M19308501D	Agron Shpk	Ndertim	0	0	0	0	0	0	0	0	0	0	0	0	0	0	0	1.39919	0.756503	0	0.00371919	0.00371919	1.32187	0	0	1.32187	-0.321873	-4.10682	0	0	0	0	0	0	0	0	0	0	0	0	0	0	0	1	0	0	0	0.00491629
2022	M21621045A	Capital One Investments	Ndertim	0	0	0	0	0	0	-0.174106	-0.155545	-0.155545	-0.185338	0	-0.464138	-0.414657	-2.42504	0	0.51832	0.844131	0	0.0670043	0.583187	0.624884	0.549551	0.549551	0.0717949	0.375116	1.66584	1.46501	1.46501	1.69845	0	0	0	0	0	0	0	0	0	0	0	0	0.0606043	0.0187345	0	0.0187345	0.0418699
2023	M21621045A	Capital One Investments	Ndertim	0	0	0	0	0	0	-0.466804	-0.441061	-0.441061	-0.566858	0	8.1983	7.74618	-3.13624	0.361126	0.756503	1.18586	0	0.121056	0.859632	1.05694	0.448019	0.448019	0.148842	-0.0569391	-18.5626	-7.86838	-7.86838	0.906835	0	0	0	0	0	0	0	0	0	0	0	0	0.176506	0.0485568	0	0.0485568	0.127949
2021	K71605001B	S.L.M	Tregtimi dhe furnizimi me mallra per pastrimin e	0	0	0	0	0	0	0	0	0	0	0	0	0	0	0	0.844131	2.5815	1.63255	2.18906	2.18906	0.229563	0	0	0.229563	0.770437	0.297964	0	0	0	0	0	0	0	0	0	0	0	0	0	0	0	0.967389	0.46426	0.374773	0.0894871	0.502527
2022	K71605001B	S.L.M	ambjenteve, prodhimin e detergjenteve	0	0	0	0	0	0	0	0	0	0	0	0	0	0	0	1.18586	2.85102	1.29811	2.48416	2.48416	0.235961	0	0	0.235961	0.764039	0.308834	0	0	0	0	0	0	0	0	0	0	0	0	0	0	0	0.979035	0.39278	0.306303	0.086477	0.586166
2021	J81426001I	MILIFAR	Tregtim te barnave veterinare	0	0	0	0	0	0	0	0	0	0	0	0	0	0	0	4.21405	0.284631	4.15245	0.00366315	0.00576559	0.289216	0.105463	0.105463	0.183753	0.710784	0.406897	0.148376	0.148376	1.75107	0	0	0	0	0	0	0	0	0	0	0	0.168796	0.815326	0.814266	0.763024	0.0512422	0.00105944
2022	J81426001I	MILIFAR	Tregtim te barnave veterinare	0	0	0	0	0	0	0	0	0	0	0	0	0	0	0	4.14913	0.267037	4.4254	0.00392439	0.00622035	0.2766	0.102094	0.102094	0.174505	0.7234	0.38236	0.141131	0.141131	1.77428	0	0	0	0	0	0	0	0	0	0	0	0.155233	0.818856	0.81777	0.772256	0.045514	0.00108549
2021	K01621001F	EKSPO SISTEM	Tregti mallrash industriale,tregtim mallra:, ushqimore, bujqesore	1.55463	0.376882	-0.349523	-0.349431	-0.224768	0.119836	-0.0269495	-0.0269424	-0.0269353	-0.280257	0	-0.0277145	-0.0277	-0.976255	1.20005	4.43708	31.8069	0.935015	2.92921	2.92921	0.027605	0	0	0.027605	0.972395	0.0283886	0	0	0	0.334846	0	4.58524	0	0.0770834	0.0792717	2.79238	0	-0.830071	0	0.0879712	0	0.90384	0.82298	0.025811	0.797169	0.0808606
2022	K01621001F	EKSPO SISTEM	Tregti mallrash industriale,tregtim mallra:, ushqimore, bujqesore	1.47624	0.485908	-0.957539	-0.957626	-0.648693	0.128143	-0.0831179	-0.0831179	-0.0831255	-2.87241	0	-0.0873834	-0.0873913	-1.70279	0.758279	4.69244	19.3312	0.562437	0.415076	0.415076	0.0488129	0	0	0.0488129	0.951187	0.0513178	0	0	0	0.316279	0	4.80367	0	0.0868037	0.0912583	1.7783	0	-1.48795	0	0.0941216	0	0.971063	0.950802	0.0274542	0.923348	0.020261
2021	K81607050Q	MEGATEK	Tregtimin me shumice te produkteve industriale, prodhimin e produkteve industriale,	0	0	0	0	0	0	0	0	0	0	0	0	0	0	0	32.7419	0.157915	0.399879	0.0131893	0.0141286	0.781928	0.26454	0.0519834	0.729945	0.218072	3.58564	1.21309	0.238377	11.313	0	0	0	0	0	0	0	0	0	0	0	0	0.407159	0.292489	0.29189	0.000598863	0.0103131
2022	K81607050Q	MEGATEK	Tregtimin me shumice te produkteve industriale, prodhimin e produkteve industriale,	0	0	0	0	0	0	0	0	0	0	0	0	0	0	0	19.8936	0.163626	0.459818	0.0423867	0.0442164	0.727667	0.217864	0.0301122	0.697555	0.272333	2.67198	0.799993	0.110572	18.5627	0	0	0	0	0	0	0	0	0	0	0	0	0.434887	0.321324	0.320749	0.000575709	0.0308434
2021	K21405001N	FLORFARMA	Tregti me shumice dhe pakice e barnave,import-eksport te	1.70571	0.890274	0.0787754	0.0669591	0.0392558	1.32103	0.0588101	0.0610096	0.0518582	0.19504	0.345654	0.138204	0.121867	0.102373	1.30368	0.557795	0.706513	0.509343	0.0446393	0.0446393	0.574469	5.92077e-05	0	0.574469	0.425531	1.35	0.000139138	0	0	0.377807	0.300306	0.471092	5.16217	0.774475	1.82002	1.34816	0.113458	-0.212672	0.60792	6.24563	0.150029	0.698472	0.672828	0.292602	0.380226	0.0256439
2022	K21405001N	FLORFARMA	Tregti me shumice dhe pakice e barnave,import-eksport te	1.7186	0.886675	0.0643778	0.0547212	0.0318406	1.29171	0.0463451	0.048387	0.0411289	0.164832	0.272169	0.112849	0.100147	0.0918084	2.87156	0.623444	0.724472	0.699518	0.0357632	0.0417506	0.589317	0.0845728	0.0845142	0.504802	0.410683	1.43497	0.205932	0.205789	3.32685	0.469817	0.279071	0.449045	4.97375	0.751609	1.83014	1.27539	0.131112	-0.214308	0.607521	3.51168	0.151115	0.718834	0.697758	0.353118	0.344639	0.0210758
2021	K81330018U	ILLYRIA GEOTECHNOLOGIES (AL)	Import-eksport, produktesh te ndryshme, prodhim, instalim,	1.30942	-0.300686	0.192973	0.163791	0.125086	0.716403	0.0923543	0.105578	0.0896122	0.134754	0.161216	0.17491	0.169716	0.361738	1.37835	1.21586	0.796475	0.435949	0.113946	0.210653	0.471988	0.232833	0.140446	0.255307	0.528012	0.893896	0.440962	0.26599	3.16296	0.203433	0.0275847	0.207493	0.984278	0.547113	1.03618	1.15917	0.00561163	-0.476648	0.0248473	9.22004	0.555853	0.314647	0.260866	0.111301	0.149565	0.0537813
2022	K81330018U	ILLYRIA GEOTECHNOLOGIES (AL)	Import-eksport, produktesh te ndryshme, prodhim, instalim,	1.33007	0.0184998	0.114084	0.0964261	0.0724971	0.913824	0.0671164	0.0783817	0.0662496	0.161326	0.180997	0.133015	0.131298	0.256281	2.67063	1.42399	2.10202	0.127851	0.00720436	0.0136289	0.495424	0.237103	0.161081	0.261885	0.504576	0.981863	0.469906	0.319241	1.78142	0.0487334	0	0.639729	1.87705	0.687051	1.36164	1.38679	0	-0.539768	0	2.13314	0.366026	0.58397	0.5804	0.0334823	0.546918	0.00356922
2021	J91419001U	REJSI FARMA	Tregti te barnave dhe mallrave farmaceutike, import-eksport	1.86759	0.975182	0.0535671	0.0441871	0.02366	1.61363	0.0452502	0.0462829	0.0381785	0.100386	0.106951	0.062699	0.0529004	0.175667	7.21563	1.23242	1.12511	1.00711	0.362824	0.391986	0.278295	0.0207042	0.0207042	0.257591	0.721705	0.385608	0.0286879	0.0286879	21.7715	0.30025	0	0.19904	2.42041	0.864017	1.19719	3.10468	0	-0.0806607	0	2.96253	0.356971	0.549239	0.448267	0.259421	0.188846	0.100972
2022	J91419001U	REJSI FARMA	Tregti te barnave dhe mallrave farmaceutike, import-eksport	1.87732	0.975625	0.0581986	0.0485704	0.0258722	1.6508	0.0504027	0.0511763	0.0427098	0.124324	0.134577	0.0736197	0.0623831	0.173077	6.51058	2.22987	1.08037	0.961359	0.35173	0.380895	0.315363	0.0241471	0.0241471	0.291216	0.684637	0.460629	0.0352699	0.0352699	16.7894	0.318379	0	0.228236	2.77077	0.879338	1.28439	2.78833	0	-0.0708498	0	2.89859	0.317362	0.594584	0.483661	0.279963	0.203698	0.110923
2021	K72228008B	PHARMA ONE sh.p.k.	Tregtimin me shumice dhe pakice i barnave dhe pajisjeve mjekesore	1.49903	0.957852	0.106461	0.067905	0.0452993	0.208811	0.0148298	0.0148298	0.009459	0.0413264	0.124926	0.112065	0.0714793	0.0171427	0	2.13222	0.444898	0.287461	0.0436946	0.0438256	0.867668	0.342411	0.0025931	0.865075	0.132332	6.55674	2.58751	0.0195954	138.384	1.78521	0	0	1.83972	0.139298	1.05264	0.160543	0	-0.39451	0	-0.601639	0.0757168	0.633545	0.248675	0.248675	0	0.0379124
2022	K72228008B	PHARMA ONE sh.p.k.	Tregtimin me shumice dhe pakice i barnave dhe pajisjeve mjekesore	1.43713	0.971338	-0.0304145	-0.0310523	-0.0216072	0.161529	-0.00341851	-0.00341851	-0.0034902	-0.0085308	-0.0410609	-0.0198455	-0.0202616	-0.00412992	0	2.04173	0.455179	0.265877	0.0274311	0.0274311	0.827743	0.511181	0	0.827743	0.172257	4.80529	2.96756	0	0	1.95803	0	0	1.32232	0.112398	0.652501	0.135788	0	-0.593289	0	-0.486793	0.0850006	0.596849	0.220078	0.220078	0	0.0227059
2021	K62202046U	DELTA PHARMA-AL SH.P.K	Tregti mallra farmaceutik	1.80488	0.935388	0.070554	0.0599702	0.0332266	2.60937	0.0989342	0.102002	0.0867007	0.292844	0.288249	0.186925	0.163811	0.355568	0	0.732358	1.34704	1.03276	0.0480069	0.0812175	0.470727	0.192485	0.192485	0.278242	0.529273	0.889385	0.363678	0.363678	1.75515	0.198764	0	0.175158	4.80653	1.44573	2.73154	3.07127	0	-0.128859	0	3.76572	0.300784	0.662161	0.639563	0.287358	0.352204	0.0225982
2022	K62202046U	DELTA PHARMA-AL SH.P.K	Tregti mallra farmaceutik	1.79777	0.927845	0.0565978	0.0480781	0.0267433	2.29189	0.0829466	0.0721539	0.0612926	0.287785	0.247786	0.160921	0.118911	0.244319	1.21379	0.721056	1.21973	0.87671	0.0715423	0.102108	0.484549	0.145048	0.145048	0.339501	0.515451	0.940049	0.281401	0.281401	1.98709	0.233473	0	0.218551	5.15381	1.27485	2.47328	2.63101	0	-0.154101	0	3.4248	0.247361	0.711743	0.677077	0.297644	0.379433	0.0346657
2021	L78006801F	L.T.E CONSTRUCTION Sh.p.k	Ndertim	1.24923	0.76789	0.0442887	0.0376204	0.0301148	0.376208	0.0133251	0.0133376	0.0113294	1.46019	0	0.334626	0.284511	0.0216638	0	2.3798	0.702641	0.908313	0.0396321	0.0618677	0.960179	0.0999099	0.0999099	0.615085	0.0398208	24.1125	2.50899	2.50899	0.0264438	1.85518	0.162596	0.653349	0	0.301152	7.56268	0.313641	0.301644	-0.713071	0.362616	0.801385	0	0.990874	0.771707	0.55869	0.213017	0.0380539
2022	L78006801F	L.T.E CONSTRUCTION Sh.p.k	Ndertim	1.60863	0.905159	0.0725216	0.0613514	0.0381389	0.538927	0.023174	0.0242963	0.0205541	2.69868	0	0.994275	0.881866	0.0324849	0	2.09644	0.526873	0.862869	0.0114138	0.0156268	0.976693	0.0748392	0.0487897	0.713379	0.0233075	41.9047	3.21095	2.0933	0.032612	1.83735	0.0158497	0.591434	0	0.335022	14.374	0.343017	0.0291214	-0.319737	0.0670726	1.20497	0	0.991413	0.813696	0.615553	0.198144	0.0111478
2021	L71827005M	MEDICAL-E GROUP SHPK	Sherbime ne fushen e mjekesise te specializuar per okulistiken	1.17088	-0.21993	0.521832	0.521832	0.445675	0.788208	0.345811	0.351284	0.351284	0.498334	0	0.578117	0.587267	0.860585	0.131712	1.61095	0.134212	0.627463	0.0157291	0.0157291	0.401833	0	0	0.401833	0.598167	0.671773	0	0	0	0.374546	0.523634	0.0707249	0	0.673175	1.1254	1.67526	0.196125	-0.299158	0.371319	-7.0293	0	0.306066	0.299745	0.252135	0.0476102	0.00632045
2022	L71827005M	MEDICAL-E GROUP SHPK	Sherbime ne fushen e mjekesise te specializuar per okulistiken	1.13365	-2.06227	0.144661	0.144661	0.127607	0.370371	0.0464449	0.0472618	0.0472618	0.0862537	0	0.115774	0.117811	0.0828951	4.97679	1.38974	0.157753	0.665989	0.0270473	0.0289081	0.598833	0.0385468	0.0385468	0.560286	0.401167	1.49273	0.0960866	0.0960866	13.9692	1.14214	0.0966025	0.0862199	0	0.326706	0.814388	0.545571	0.110334	-0.719187	0.184474	-3.30825	0	0.461531	0.401313	0.373144	0.0281686	0.0161968
2021	K52531415H	SARK	Import-eksport ,tregtim me shumice dhe pakice te mallrave farmaceutike	1.85683	0.778905	0.000969301	0.000969301	0.000522018	0.623949	0.000325713	0.000325713	0.000325713	0.00316243	0.010287	0.0281661	0.0281661	0.0051815	-171.622	0.761674	9.35842	4.91131	0.0201194	0.316363	0.988436	0	0	0.0628607	0.011564	85.4753	0	0	0.111276	0.918757	0.712419	1.68696	10.6128	0.336029	29.0582	0.33996	0.65454	-0.142196	3.79604	0.402842	0.0316626	0.897005	0.877119	0.308729	0.56839	0.0198868
2022	K52531415H	SARK	Import-eksport ,tregtim me shumice dhe pakice te mallrave farmaceutike	0	0	0	0	0	0	0	0	0	0	0	0	0	0	0	0.823742	4.72172	2.77463	0.0252654	0.226289	0.985163	0	0	0.109994	0.0148368	66.3998	0	0	0.200468	0	0.908881	0	0	0	0	0	0	0	2.67412	0	0.106653	0.824557	0.799666	0.305194	0.494473	0.0248905
2021	K53717806Q	ALBANIA NEW FARM SHPK	Tregti me shumice e pakice te artikujve industrial, bujqesor	1.78612	0.987059	0.194189	0.165061	0.092413	1.82618	0.198545	0.198545	0.168763	11.3669	10.9602	0.433447	0.36843	0.410503	0	14.2697	0.531302	1.50014	0.181895	0.203811	0.541939	0	0	0.483663	0.458061	1.18312	0	0	0.299723	0.709644	0	0.151169	66.4013	1.02243	2.23209	1.88662	0	-0.0232629	0	2.04949	0.0153978	0.982533	0.883957	0.725562	0.158395	0.0985759
2022	K53717806Q	ALBANIA NEW FARM SHPK	Tregti me shumice e pakice te artikujve industrial, bujqesor	1.96589	0.983668	0.0266723	0.0226715	0.0115325	2.1107	0.0258988	0.0286372	0.0243416	1.30176	1.36638	0.0469581	0.0441347	0.0681279	0	7.49635	0.869217	1.70899	0.204777	0.241579	0.44847	0	0	0.38015	0.55153	0.813138	0	0	0.291206	0.605098	0.000336516	0.19946	60.2684	1.07366	1.9467	2.39406	0.000203625	-0.0417394	0.00057886	1.78958	0.0178147	0.980105	0.888268	0.649672	0.238596	0.0918364
2021	K62220004U	GEN - ALB FARMA	Importim dhe shperndarje barnash, import-eksport I medikamenteve mjeksore.	1	0	0.280075	0.238027	0.238027	0.8365	0.234282	0.234282	0.19911	9.92606	71.4903	0.44104	0.374827	0.553368	1.13583	2.03144	1.6598	0.64642	0.40462	0.448028	0.468796	0.0454201	0.0454201	0.423376	0.531204	0.882515	0.0855041	0.0855041	0.519654	0.327171	0	0.613311	300.345	0.8365	1.57472	1.78436	0	-0.719925	0	1.5126	0.00278513	0.976397	0.786713	0.273678	0.513035	0.189684
2022	K62220004U	GEN - ALB FARMA	Importim dhe shperndarje barnash, import-eksport I medikamenteve mjeksore.	1.61208	0.928922	0.288374	0.245118	0.15205	1.47853	0.261782	0.264483	0.224811	5.21094	106.662	0.45126	0.387529	0.701613	1.16788	2.57821	1.72637	0.819124	0.175172	0.197131	0.419886	0.0467717	0.0467717	0.373115	0.580114	0.7238	0.080625	0.080625	1.07409	0.333234	0	0.622124	435.148	0.917154	1.58099	2.18429	0	-0.102121	0	1.59049	0.00210768	0.949763	0.876211	0.305627	0.570583	0.0735524
2019	L61607041Q	ARREDO - DUE		1.75706	0.91287	0.0820573	0.0686952	0.0390967	1.87801	0.0846389	0.0877057	0.0734238	4.65291	0	0.506434	0.439329	0.101623	0	2.30622	0.320136	0.858686	0.0410842	0.0410842	0.832873	0	0	0.832873	0.167127	4.98347	0	0	0	0.669118	0	0.177603	0	1.06883	6.39534	1.28331	0	-0.158012	0	7.17644	0	0.981809	0.947592	0.715177	0.232415	0.0342179
2020	L61607041Q	ARREDO - DUE		1.74664	0.88623	0.0518219	0.0433988	0.024847	1.50905	0.0414751	0.0447726	0.0374953	1.81628	0	0.22378	0.202307	0.0509108	0	2.5455	0.319741	0.879732	0.0721437	0.0721437	0.814662	0.0893594	0	0.814662	0.185338	4.39554	0.482142	0	0	0.829524	0	0.211813	0	0.86397	4.66159	1.06053	0	-0.197718	0	5.31664	0	0.977165	0.918392	0.716684	0.201708	0.0587727
2018	L62801001M	VEGA FRESH		1.84075	0.791786	0.0605454	0.0552469	0.0300132	2.15356	0.0464141	0.0708342	0.0646352	166.705	0	2.56849	3.57682	0.0472683	0	1.17882	1.0073	0.0108175	0.470654	0.470654	0.981929	0.148078	0	0.981929	0.0180706	54.3386	8.19441	0	0	0.00907917	0	0.253238	0	1.16993	64.7426	1.19147	0	-0.0778278	0	65.7557	0	0.999722	0.537573	0.010622	0.526951	0.462149
2019	L62801001M	VEGA FRESH		1.96508	0.89837	-0.0568448	-0.0568448	-0.0289274	1.53666	-0.0450844	-0.0444514	-0.0444514	-59.418	0	1.4205	1.40056	-0.0436975	0	1.19947	0.968503	0	0.142816	0.142816	1.03174	0.0745663	0	1.03174	-0.0317383	-32.5076	-2.34941	0	0	0	0	0.837406	0	0.78198	-24.6383	0.757924	0	-0.0909522	0	-24.0631	0	0.999241	0.851893	0	0.851893	0.147348
2019	L68120001G	COLONY BERRY FARM		0	0	0	0	0	0	0	0.0273456	0.0273456	0	0	0	-0.0928671	0	-11.8618	1.01812	0.047853	0	0.047853	0.047853	1.29446	1.0963	0	1.29446	-0.29446	-4.39605	-3.72309	0	0	0	0	0	0	0	0	0	0	0	0	0	0	0.0619438	0	0	0	0.0619438
2020	L68120001G	COLONY BERRY FARM		0	0	0	0	0	0	-0.0636571	-0.0636571	-0.0636571	0	0	0.168601	0.168601	-0.04621	5.98336	0.968503	0	0	0	0	1.37756	1.16869	0	1.37756	-0.377561	-3.64858	-3.09538	0	0	0	0	0	0	0	0	0	0	0	0	0	0	0	0	0	0	0
2019	L61821022R	ALKALOID		1	43.7561	0.0758618	0.0713194	0.0713194	3.23814	0.245651	0.245651	0.230942	1.38776	0	0.26951	0.253373	2.77481	1.87862	0.047853	9.29628	0	3.63247	3.63247	0.0885287	0	0	0.0885287	0.911471	0.0971272	0	0	0	0	0	0.0995384	0	3.23814	3.55265	36.5773	0	-0.924138	0	4.40887	0	0.822988	0.50141	0	0.50141	0.321578
2020	L61821022R	ALKALOID		1	37.288	0.0285588	0.0219591	0.0219591	4.01347	0.11462	0.11462	0.0881323	0.942206	0	0.249156	0.191578	0.212273	3.07778	0	1.62667	0	0.990303	0.990303	0.539967	0	0	0.539967	0.460034	1.17375	0	0	0	0	0	0.0794511	0	4.01347	8.72431	7.43282	0	0.161262	0	11.8608	0	0.878349	0.343619	0	0.343619	0.534731
2020	L62114039D	DYNAMIK		1.93954	0.853637	-0.595398	-0.595398	-0.306979	0.255406	-0.0864151	-0.0784044	-0.0784044	-0.556765	0	-0.998251	-0.905713	-0.105775	-2.06021	9.29628	0.28833	0.589883	0.00510608	0.00570899	0.913433	0.0964646	0.0964646	0.816969	0.0865666	10.5518	1.11434	1.11434	1.60898	3.65964	0	1.6981	0	0.131684	1.52119	0.144164	0	-0.595028	0	-1.32351	0	0.717473	0.712809	0.481916	0.230893	0.00466407
2021	L62114039D	DYNAMIK		1.41713	0.709962	0.0486546	0.0486546	0.0343333	0.216673	-5.60919e-05	0.00743911	0.00743911	-0.000339605	0	-0.000565504	0.0749992	-6.80619e-05	11.8432	1.62667	0.305471	0.543775	0.00444028	0.00485341	0.900811	0.0766789	0.0766789	0.824132	0.0991892	9.08174	0.773057	0.773057	2.15402	2.93102	0	1.55009	0	0.152896	1.54146	0.169732	0	-0.485198	0	-1.23064	0	0.69989	0.695891	0.448142	0.247748	0.00399985
2020	L62120006L	TechDigit		1.85744	0.860991	-0.189085	-0.189085	-0.101799	0.915904	-0.0846874	-0.0932377	-0.0932377	-0.528748	0	-0.0867942	-0.0955573	-3.48885	0	0.878213	34.5985	0	23.5657	23.5657	0.0242737	0	0	0.0242737	0.975726	0.0248776	0	0	0	0	0	0.440366	0	0.4931	0.505368	20.3142	0	-0.348985	0	0.604616	0	0.839834	0.255449	0	0.255449	0.572028
2021	L62120006L	TechDigit		1.87954	0.931084	0.0076142	0.0076142	0.0040511	2.05389	0.00284802	0.0083205	0.0083205	0.0203844	0	0.00311043	0.00908714	0.0337581	-10.4887	0.849246	10.1971	0	3.51658	3.51658	0.0843655	0	0	0.0843655	0.915635	0.0921388	0	0	0	0	0	0.472369	0	1.09276	1.19345	12.9527	0	-0.107841	0	1.40835	0	0.860284	0.55204	0	0.55204	0.296678
2021	L62211021M	APIPHARMA		0	0	0	0	0	0	-0.0677184	-0.0481274	0.0406771	-0.231168	0	-0.339905	0.204174	-0.0938746	0	34.5985	0.457144	0.523017	0.0452391	0.0502186	0.800772	0.378973	0	0.721371	0.199228	4.01938	1.90221	0	3.68936	0	1	0	0	0	0	0	0	0	0	0	0	0.70706	0.626203	0.37729	0.248914	0.0362262
2022	L62211021M	APIPHARMA		0	0	0	0	0	0	-0.0782625	-0.0572432	0.0483684	-0.302508	0	-0.354822	0.21929	-0.192654	0	10.1971	0.702806	1.12197	0.0207881	0.0398855	0.779432	0.361843	0	0.406234	0.220568	3.53374	1.6405	0	0.693231	0	1	0	0	0	0	0	0	0	0	0	0	0.741288	0.717078	0.455784	0.261294	0.0162029
2016	L62217007H	BIOGENIS		1	1.12791	-0.244253	-0.244253	-0.244253	0.722117	-0.184666	-0.17638	-0.17638	0	0	21.8658	20.8847	-0.183119	0	0.980161	0.991625	0	0.126346	0.126346	1.00845	0	0	1.00845	-0.00844542	-119.407	0	0	0	0	0	1	0	0.722117	-85.5041	0.71607	0	-1.23278	0	-85.5041	0	1	0.872587	0	0.872587	0.127413
2017	L62217007H	BIOGENIS		0	0	0	0	0	0	-48.3512	-46.8219	-46.8219	0	0	1.02006	0.987801	-0.998988	0.257923	1.82478	0.0206611	0	0.0121087	0.0121087	48.4001	0	0	48.4001	-47.4001	-1.0211	0	0	0	0	0	0	0	0	0	0	0	0	0	0	0	1	0.413936	0	0.413936	0.586064
2021	L56503401V	DRITAN XHEKA		1.95574	0.986536	0.0195164	0.0195164	0.00997903	2.23422	0.0222954	0.0222954	0.0222954	0	0	0.0700764	0.0700764	0.0326988	13.2701	0.991625	0.286737	1.17988	0.0542435	0.0542435	0.681842	0	0	0.681842	0.318158	2.14309	0	0	0	0.704215	0.154501	0.0986253	0	1.14239	3.59064	1.67545	0.108802	-0.0247441	0.212545	3.59064	0	1	0.963015	0.804491	0.158524	0.0369855
2022	L56503401V	DRITAN XHEKA		1.94895	0.99559	0.0176542	0.0176542	0.00905831	2.93813	0.0265999	0.0266145	0.0266145	0	0	0.136589	0.136664	0.0330329	6.31722	0.0206611	0.55753	0.684312	0.388683	0.388683	0.805256	0	0	0.805256	0.194744	4.13494	0	0	0	0.365524	0	0.0416082	0	1.50755	7.74117	1.87214	0	-0.033389	0	7.74117	0	1	0.687011	0.551046	0.135965	0.312989
2021	L42314015H	TUFIK KURTI		1.91929	0.967251	0.0343342	0.0343342	0.017889	4.61951	0.0784704	0.0826384	0.0826384	0.808407	0	0.18017	0.18974	0.139017	4.04922	1.46662	0.239846	1.35978	0.0302382	0.0302382	0.564466	0.0766327	0	0.564466	0.435534	1.29603	0.175951	0	0	0.318897	0	0.0491575	0	2.40688	5.52627	4.264	0	-0.044643	0	7.11114	0	0.902932	0.885864	0.767548	0.118316	0.0170684
2022	L42314015H	TUFIK KURTI		1.96668	0.795392	0.0135979	0.0135979	0.00691413	6.72114	0.041228	0.0464708	0.0464708	0.347544	0	0.0579204	0.065286	0.143055	13.7165	1.24184	1.21773	1.84051	0.00686706	0.00686706	0.288196	0.181392	0	0.288196	0.711804	0.40488	0.254834	0	0	0.15521	0	0.102112	0	3.4175	4.80118	11.8583	0	-0.0181848	0	5.76134	0	0.881373	0.879394	0.530428	0.348966	0.00197906
2021	L64703403R	LUIS CO		1.65539	0.872256	0.0820269	0.0695567	0.0420183	0.991415	0.0356842	0.049126	0.0416575	0.217385	0	0.0536974	0.062686	0.419178	14.8875	1.59962	6.77788	3.04072	0.383227	1.51014	0.335457	0.250328	0.250328	0.0851291	0.664543	0.504794	0.376693	0.376693	0.655747	0.432214	0.513145	0.644744	0	0.598901	0.901223	1.78533	0.221788	-0.240187	6.60126	0.79777	0	0.835848	0.707292	0.258853	0.448438	0.128556
2022	L64703403R	LUIS CO		1.5248	0.717457	0.119219	0.100777	0.066092	0.663223	0.039764	0.0518551	0.0438337	0.235972	0	0.0520868	0.0574177	0.493512	16.3493	3.05825	5.63667	4.68295	0.0681773	0.200184	0.236582	0.156079	0.156009	0.0805735	0.763418	0.309899	0.204448	0.204356	1.08014	0.86749	0.755143	0.832956	0	0.434959	0.569752	1.83851	0.655079	-0.38018	18.9279	0.579238	0	0.831489	0.815359	0.377322	0.438037	0.0161295
2021	L6221001C	ER-LI FARMA		1.65542	0.511656	-0.229531	-0.23079	-0.139415	2.23937	-0.310498	-0.310498	-0.312202	-7.51237	0	0.492479	0.495181	-0.677503	1.13503	9.8186	0.264324	1.82748	0.00873503	0.0310765	1.63048	0	0	0.458298	-0.63048	-2.58609	0	0	0.0352604	0.61913	0	0.0680145	0	1.35275	-2.14559	0.829665	0	-0.574115	0	2.7035	0	0.958668	0.944426	0.837529	0.106897	0.0142423
2022	L6221001C	ER-LI FARMA		1.61916	0.649106	0.00785673	0.00625345	0.00386215	4.26968	0.0207179	0.0207179	0.0164901	0.192583	0	-0.0299884	-0.0238688	0.0349902	-45.3505	10.3196	0.187285	1.31991	0.00355831	0.0101614	1.69086	0	0	0.592107	-0.690865	-2.44746	0	0	0.09791	0.296374	0	0.0391455	0	2.63697	-3.81691	1.55954	0	-0.372957	0	8.7807	0	0.892421	0.886404	0.781528	0.104876	0.00601661
2021	L42103023G	BESIM KAMBERI		1	0.755333	0.231472	0.231472	0.231472	1.01429	0.23478	0.23478	0.23478	0.541883	0	1	1	0.306813	0	2.0918	0.356077	0.384538	0.0226018	0.0226018	0.76522	0.422651	0	0.76522	0.23478	3.25931	1.8002	0	0	0.29011	0	0	0	1.01429	4.32018	1.32549	0	-0.768528	0	-5.11013	0	0.566734	0.549438	0.294256	0.255182	0.0172954
2022	L42103023G	BESIM KAMBERI		1	0.970061	0.742891	0.631458	0.631458	1.20078	0.892049	0.892049	0.758242	3.74947	0	1.17647	1	3.68983	0	1.5072	3.15226	0	3.06365	3.06365	0.241758	0	0	0.241758	0.758242	0.318841	0	0	0	0	0	0	0	1.20078	1.58364	4.96686	0	-0.257109	0	2.30774	0	0.762087	0.0214231	0	0.0214231	0.740664
2021	L67508901K	FARMACI RAMI		1.89	1	0.068051	0.068051	0.0360058	2.86788	0.10326	0.10326	0.10326	0	0	0.55249	0.55249	0.126996	0	0.740615	0.482463	0.747398	0.465426	0.465426	0.8131	0	0	0.8131	0.1869	4.35045	0	0	0	0.400495	0	0	0	1.5174	8.11876	1.86619	0	-0.041949	0	8.11877	0	1	0.621562	0.60771	0.0138526	0.378438
2022	L67508901K	FARMACI RAMI		1.87	1	0.103597	0.103597	0.0553996	4.71428	0.261169	0.261169	0.261169	0	0	0.64096	0.64096	0.440767	0	3.15226	0.311093	1.37657	0.221956	0.221956	0.592534	0	0	0.592534	0.407466	1.45419	0	0	0	0.323548	0	0	0	2.52101	6.18704	4.25462	0	-0.0264028	0	6.18704	0	1	0.868483	0.815666	0.0528168	0.131517
2021	L61321012S	GRIFIN ALBANIA		1.69798	-1.04026	0.126123	0.126123	0.0742782	3.08295	0.224056	0.228996	0.228996	1.24666	0	0.460548	0.470704	0.436328	1.0495	1.22986	1.3778	0.219612	0.68204	0.68204	0.513502	0	0	0.513502	0.486498	1.05551	0	0	0	0.0621105	0	0.125269	0	1.81565	3.73209	3.53583	0	-0.173172	0	5.91856	0	0.820276	0.470046	0.112771	0.357275	0.350229
2022	L61321012S	GRIFIN ALBANIA		1.53569	-4.29904	0.150429	0.150429	0.097955	2.2707	0.218326	0.222427	0.222427	1.54664	0	0.479264	0.488265	0.401	0.978186	1.68767	0.941045	0.636383	0.372761	0.372761	0.544455	0	0	0.544455	0.455545	1.19517	0	0	0	0.234328	0	0.129762	0	1.47862	3.24582	2.71578	0	-0.311106	0	4.70323	0	0.858839	0.655887	0.346482	0.309405	0.202951
2021	L61313035Q	AMICUS PHARMA		1	0	0.052873	0.052873	0.052873	1.09029	0.0122852	0.057647	0.057647	0.016103	0	-0.0584584	-0.274309	0.0865797	-4.64599	1.59741	1.67086	0	0.0428152	0.36515	1.21015	1.06826	1.06826	0.141895	-0.210153	-5.75843	-5.08324	-5.08324	0.714166	0	0	0	0	1.09029	-5.18808	0.900953	0	-0.930556	0	11.4537	0	0.237086	0.185273	0	0.185273	0.0518129
2022	L61313035Q	AMICUS PHARMA		1	0	0.0612269	0.0520312	0.0520312	6.05661	0.347045	0.370827	0.315133	1.75142	0	1.34013	1.2169	0.75751	-0.180414	1.57743	1.75023	0	0.826826	1.33738	0.741036	0.282897	0.282897	0.458139	0.258964	2.86155	1.09242	1.09242	0.700434	0	0	0.0144849	0	6.05661	23.3879	8.17316	0	-0.934846	0	17.6213	0	0.801849	0.137846	0	0.137846	0.612708
2020	L61509020B	ITALIAN MEDICAL CENTER		1.33782	0.045787	0.112787	0.107147	0.0800909	0.806544	0.0679967	0.0679967	0.0645969	0.1055	0	-0.199274	-0.18931	0.0551793	-6.36857	1.67086	0.227038	0.0614376	0.107337	0.116825	1.34122	0.108936	0.108936	1.23229	-0.341222	-3.93064	-0.319253	-0.319253	5.91646	0.125579	0	0	0	0.602879	-1.76682	0.4495	0	-0.549393	0	-0.687589	0	0.355484	0.211522	0.0757087	0.135813	0.143962
2021	L61509020B	ITALIAN MEDICAL CENTER		2.12246	0.827092	-0.83641	-0.83641	-0.394076	0.449484	-0.177131	-0.177131	-0.177131	-0.177131	0	0.276018	0.276018	-0.107892	2.66577	1.75023	0	0	0	0	1.64174	0	0	1.64174	-0.641736	-2.55827	0	0	0	0	0	0	0	0.211775	-0.330003	0.128995	0	-0.71395	0	-0.128995	0	0	0	0	0	0
2021	L61521002R	IMLS		1.04504	-44.147	0.123225	0.104869	0.100349	0.93636	0.084379	0.11041	0.0939629	0.0985562	0	0.356157	0.39661	0.518668	0	0.288475	0.823698	0.016833	0.0697612	0.327221	0.763085	0.6004	0.6004	0.162684	0.236915	3.22092	2.53424	2.53424	1.42597	0.00305632	1	0.00889448	0	0.896003	3.78195	1.17419	0.00305632	-0.802681	0.0210108	-34.5372	0	0.136741	0.0725699	0.00273847	0.0698314	0.0532337
2022	L61521002R	IMLS		1.05936	-59.988	0.0642497	0.0548291	0.051757	1.15893	0.0244388	0.0702888	0.0599828	0.02834	0	0.0926238	0.227337	0.0870185	0	0	0.451419	0.00839495	0.0612306	0.160497	0.73615	0.682956	0.455304	0.280846	0.26385	2.79003	2.58842	1.72561	1.894	0.00215512	1	0.000430717	0	1.09399	4.14627	1.4861	0.00215512	-0.834483	0.787426	-7.21113	0	0.129137	0.0664519	0.00235769	0.0640942	0.0450749
2021	L41825004O	D&J	FARMACI	1.00431	0.891723	0.0481646	0	0	1.12793	0.0540934	0.0540934	0	3.97293	0	0.121275	0	0.0976482	0	0.840531	1.4475	0.333098	1.34924	1.34924	0.553962	0.522988	0	0.553962	0.446038	1.24196	1.17252	0	0	0.1643	0	0	0	1.12309	2.51794	2.02738	0	-0.94495	0	2.59722	0	0.986384	0.238956	0.184524	0.0544325	0.747428
2022	L41825004O	D&J	FARMACI	1.03379	0.811881	-0.204561	0	0	0.304163	-0.0601859	-0.0601859	0	-2.47964	0	-0.0601859	0	0	0	0.459814	0	0	0	0	0	0	0	0	1	0	0	0	0	1.22107	0	0	0	0.29422	0.29422	0	0	-1.07049	0	0.301539	0	0.975728	0.662315	0.359264	0.303051	0.313413
2021	L12107043O	PETER PHARMA	FARMACI	-0.387259	0.56434	0.190081	0.161569	-0.417211	-0.278147	0.13714	0.136525	0.116046	7.65509	0	0.155108	0.13125	1.18389	6.60335	1.7806	8.39971	0.0625808	1.43431	1.43431	0.115839	0	0	0.115839	0.884161	0.131015	0	0	0	0.0100931	0	0.087389	0	0.718244	0.812345	6.20037	0	0.115432	0	0.830894	0	0.980261	0.604131	0.00724929	0.596882	0.166149
2022	L12107043O	PETER PHARMA	FARMACI	-0.333915	0.562236	0.194122	0.165004	-0.494148	-0.204396	0.12443	0.118826	0.101002	8.68443	0	0.135375	0.109886	1.53901	8.08362	0	12.0899	0.0804885	0.646317	0.646317	0.0808504	0	0	0.0808504	0.91915	0.0879622	0	0	0	0.0106311	0	0.0932987	0	0.612119	0.665963	7.57101	0	0.129765	0	0.677772	0	0.983985	0.115269	0.00650753	0.108762	0.052255
2021	M01412004D	ALBSTRUKTUR	NDERTIM	1.60007	1.64001	0.0930863	0	0	1.46337	0.0851338	0.0851338	0	0.454415	0	0.543772	0	0.100937	0	8.46229	0.860938	0.102561	0.159735	0.159735	0.843439	0	0	0.843439	0.156561	5.38727	0	0	0	0.0945845	1	0.644027	0	0.914568	5.8416	1.08433	0.0945845	-0.306848	0.926178	-29.7068	0	0.812652	0.677925	0.086504	0.591421	0.134727
2022	M01412004D	ALBSTRUKTUR	NDERTIM	1.5396	1.79816	0.0105602	0	0	0.897651	0.006157	0.006157	0	0.0484128	0	0.0487063	0	0.00704793	0	12.1704	0.883853	0.11527	0.405105	0.405105	0.873589	0	0	0.873589	0.126411	6.91072	0	0	0	0.172712	1	0.660873	0	0.58304	4.61227	0.667408	0.172712	-0.449836	1.61523	-760.825	0	0.872823	0.518927	0.100698	0.418229	0.353896
2021	L62030021J	FARMACIA BRITANIKE	FARMACI	1.63792	0.570079	0.149914	0	0	4.35006	0.350398	0.398149	0	23.8013	0	0.840828	0	0.600746	0	0.963499	0.111513	1.57772	0.0953127	0.0953127	0.583271	0	0	0.583271	0.416729	1.39964	0	0	0	0.346495	0	0	0	2.65584	6.37307	4.55336	0	-0.194186	0	6.60646	0	0.985278	0.929685	0.920236	0.00944916	0.0555931
2022	L62030021J	FARMACIA BRITANIKE	FARMACI	1.54903	-0.257778	0.185232	0	0	3.76311	0.430947	0.449989	0	26.1835	0	1.01076	0	6.99556	0	0.999123	0.972095	14.9937	0.0795729	0.740976	0.573641	0	0	0.0616029	0.426359	1.34544	0	0	0.0321435	0.38021	0	0	0	2.42933	5.69786	4.23494	0	-0.257902	0	2.63503	0	0.983541	0.937895	0.923657	0.0142376	0.0456463
2021	J93610823R	MEDFAU	FARMACI	1.73252	1	0.18177	0	0	1.19794	0.125683	0.125683	0	0.77573	0	0.213031	0	0.4427	0	1.68923	2.26532	0.686335	0.0521944	0.0753813	0.410023	0.225923	0.107509	0.283902	0.589977	0.694981	0.382936	0.182225	1.28464	0.281805	0	0	0	0.691442	1.17198	1.68635	0	-0.0857086	0	1.24791	0	0.83798	0.816531	0.194852	0.62168	0.0214009
2022	J93610823R	MEDFAU	FARMACI	1.73	1	0.185208	0	0	1.22404	0.131042	0.131042	0	0.964252	0	0.215772	0	0.469685	0	15.9658	2.29328	0.803845	0.0346758	0.0488048	0.392682	0.191498	0.0965381	0.279	0.607318	0.646583	0.315318	0.158958	1.19545	0.316976	0	0	0	0.707541	1.16503	1.80182	0	-0.0847955	0	1.20927	0	0.864099	0.850483	0.224273	0.62621	0.0136165
2021	K78416901D	B.F.B.-2007 sh.p.k.	FARMACI	1.53418	0.585768	0.138202	0.138202	0.0900822	1.67032	0.150466	0.150466	0.150466	0.834341	0	0.725728	0.725728	0.189823	0	2.95166	0.667835	0.366215	0.00703031	0.00703031	0.792668	0	0	0.792668	0.207332	3.82319	0	0	0	0.266626	0	0.137097	0	1.08874	5.25121	1.37351	0	-0.327621	0	40.3384	0	0.819659	0.814086	0.290287	0.523799	0.0055727
2022	K78416901D	B.F.B.-2007 sh.p.k.	FARMACI	1.69816	0.835312	0.126877	0.126877	0.0747145	3.86061	0.288443	0.288443	0.288443	0.877147	0	0.425559	0.425559	0.895223	0	3.09713	1.01765	1.06538	0.067667	0.067667	0.322202	0	0	0.322202	0.677798	0.475367	0	0	0	0.150993	0	0.123298	0	2.2734	3.3541	7.05582	0	-0.174959	0	6.51487	0	0.671158	0.649355	0.343267	0.306088	0.0218025
2020	L86322004V	MEDICAL DISTRIBUTION SH.P.K	FARMACI	1.8581	0.869976	0.0659165	0.0626858	0.0337365	4.57473	0.162289	0.162289	0.154335	11.7034	0	1.16482	1.10773	0.188561	0	1.03405	0.359833	0.785935	0.0303159	0.0303159	0.860674	0	0	0.860674	0.139326	6.17744	0	0	0	0.274745	0	0.109053	0	2.46204	17.6712	2.8606	0	-0.0759836	0	19.6244	0	0.986133	0.960041	0.676434	0.283607	0.0260922
2021	L86322004V	MEDICAL DISTRIBUTION SH.P.K	FARMACI	1.81736	0.702532	0.0630453	0.0535885	0.029487	1.66464	0.0429783	0.0577471	0.0490851	6.52276	0	0.350538	0.400346	0.102377	0	2.08303	0.776246	1.59013	0.103395	0.216096	0.877393	0.493597	0.45759	0.419803	0.122607	7.15616	4.02586	3.73218	0.0143993	0.728785	0	0.238802	0	0.915963	7.47074	1.04396	0	-0.165697	0	1.59685	0	0.993411	0.902693	0.66754	0.235153	0.090718
2021	M02202039K	FARMACI KEJDI	FARMACI	1.7713	0.787668	0.0274493	0.0274493	0.0154967	3.38164	0.0524044	0.0524044	0.0524044	0.967779	0	1	1	6.75342	0	1.14577	0	121.893	0	0	0.947596	0	0	0.00775968	0.0524044	18.0824	0	0	0.0576155	0.495435	1	0	0	1.90913	36.4308	2.01471	0.495435	-0.201252	0	2.03512	0	0.945851	0.945851	0.945851	0	0
2022	M02202039K	FARMACI KEJDI	FARMACI	1.75758	0.785661	0.0467548	0.0467548	0.0266018	1.61806	0.0430435	0.0430435	0.0430435	0.821636	0	0.567693	0.567693	0.127982	0.761514	2.36637	0.0852607	2.7323	0.0246133	0.0676344	0.924178	0	0	0.336324	0.0758217	12.1888	0	0	0.0891165	0.998169	1	0	0	0.920623	12.1419	0.996153	0.998169	-0.195673	3.48314	1.50604	0	0.947612	0.924865	0.918937	0.00592815	0.0227471
2021	L93101401U	Genti 001	Tregti me shumice e pakice i materialeve te ndertimit	1.67813	0.893602	0.134058	0.113949	0.0679023	1.79937	0.142521	0.143743	0.122181	0.375991	5.92859	0.527459	0.452185	0.527306	0	121.893	0.339784	1.95763	0.017064	0.0460753	0.729798	0.10302	0	0.270281	0.270202	2.70093	0.381272	0	0.824895	0.493459	0	0.043408	52.0285	1.07225	3.96831	1.46924	0	-0.18667	0	3.05774	0.0206088	0.620947	0.608493	0.52911	0.0793838	0.0124532
2022	L93101401U	Genti 002	Tregti me shumice e pakice i materialeve te ndertimit	1.75583	0.924756	0.134325	0.114176	0.0650268	1.61831	0.12293	0.123804	0.105234	0.454588	8.7657	0.468069	0.400687	0.447075	0	2.81756	2.10527	0.548066	0.00780355	0.0209265	0.737367	0.120052	0	0.274966	0.262633	2.80759	0.457108	0	0.584822	0.163505	0	0.621825	76.7736	0.921681	3.50938	1.24996	0	-0.108897	0	2.0274	0.0120052	0.729578	0.723824	0.1507	0.573124	0.00575408
2021	L71421503H	Altion Basha	Tregti me shumice e pakice i materialeve te ndertimit	1.33038	-0.0936582	0.254354	0.254354	0.191189	0.633646	0.121146	0.121146	0.121146	1.2098	0	0.369844	0.369844	0.18016	1.60621	2.29742	0.934193	0.404014	0.00846722	0.00846722	0.672439	0	0	0.672439	0.327561	2.05287	0	0	0	0.570399	1	1.28072	0	0.47629	1.45405	0.708302	0.570399	-0.415266	1.67693	2.09428	0	0.899863	0.894169	0.271675	0.622494	0.00569369
2022	L71421503H	Altion Basha	Tregti me shumice e pakice i materialeve te ndertimit	1.94035	0.837872	-0.122618	-0.122618	-0.0631937	1.28118	-0.0809625	-0.0809625	-0.0809625	-1.20683	0	-0.418738	-0.418738	-0.100369	-3.26578	2.65334	0.742098	0.414428	0.00644984	0.00644984	0.806651	0	0	0.806651	0.193349	4.17199	0	0	0	0.506297	0.822213	0.862456	0	0.660283	3.41498	0.818548	0.416283	-0.182269	0.771522	5.22947	0	0.932913	0.92771	0.334299	0.593411	0.00520277
2021	J61827062E	BIOMETRIC ALBANIA	FARMACI	1.63146	0.906936	0.320451	0.272376	0.166952	1.07282	0.228642	0.210722	0.179109	65.6035	0	0.742275	0.581469	0.33114	0	1.33821	1.24481	0.198434	0.98937	0.991522	0.691971	0	0	0.69047	0.308029	2.24645	0	0	2.32104	0.208359	0	0.265954	0	0.65758	2.1348	0.9503	0	-0.0753381	0	2.14864	0	0.996515	0.311899	0.137013	0.174886	0.684616
2022	J61827062E	BIOMETRIC ALBANIA	FARMACI	1.67634	0.893921	0.231195	0.196282	0.11709	1.14482	0.162052	0.15789	0.134047	10.2623	0	0.527099	0.436009	0.23399	0	1.15653	1.17112	0.249972	0.957125	0.957125	0.692559	0	0	0.692559	0.307441	2.25266	0	0	0	0.253496	0	0.190333	0	0.68293	2.22134	0.986096	0	-0.0985563	0	2.34174	0	0.984192	0.321327	0.17312	0.148207	0.662865
2021	J62009007F	MONTAL	FARMACI	1.52835	0.909746	0.325218	0.276425	0.180865	0.814183	0.16733	0.17325	0.147257	22.9606	0	0.589213	0.518529	0.233698	0	1.44324	1.22944	0.157009	0.745404	0.745404	0.716011	0	0	0.716011	0.283989	2.52126	0	0	0	0.21103	0	0.650577	0	0.532719	1.87584	0.74401	0	-0.135318	0	1.92525	0	0.992712	0.458995	0.11242	0.346575	0.533717
2022	J62009007F	MONTAL	FARMACI	1.63415	0.915418	0.259136	0.220233	0.134769	1.06004	0.158593	0.168096	0.14286	13.5662	0	0.453844	0.408822	0.243781	0	1.4211	1.28684	0.232336	0.648753	0.648753	0.650556	0	0	0.650556	0.349444	1.86169	0	0	0	0.233008	0	0.633116	0	0.648679	1.85632	0.997115	0	-0.0920651	0	1.92057	0	0.98831	0.566259	0.151147	0.415112	0.42205
2021	J61826144H	EURODENTA	FARMACI	1.8135	0.922255	0.0893004	0.0757031	0.0417443	1.35175	0.0674772	0.0665628	0.0564277	0.465835	0.439519	0.0951861	0.0795993	0.231799	0	1.38645	0.381076	2.55654	0.197487	0.197487	0.291103	0	0	0.291103	0.708897	0.410642	0	0	0	0.998436	0	0.0404245	5.80582	0.745381	1.05147	2.56054	0	-0.0984299	0	1.32149	0.128385	0.855148	0.797659	0.744216	0.0534432	0.057489
2022	J61826144H	EURODENTA	FARMACI	1.8107	0.945744	0.122483	0.104007	0.0574401	2.26826	0.154426	0.153435	0.130289	1.00514	0.941842	0.165281	0.139447	2.35128	0	1.51918	1.69753	11.1892	1.02117	1.02117	0.0656773	0	0	0.0656773	0.934323	0.070294	0	0	0	0.586634	0	0.0352551	9.05558	1.2527	1.34075	19.0735	0	-0.0676063	0	1.60461	0.138334	0.846363	0.779296	0.734874	0.0444217	0.0670674
2021	K31610086D	SAER MEDICAL	FARMACI	1.72582	0.694656	0.113709	0.0912028	0.0528459	2.76309	0.1514	0.182051	0.146018	2.14128	0	0.326354	0.314751	0.282419	0	2.93761	1.08148	0.499285	0.0209102	0.0209102	0.536085	0	0	0.536085	0.463915	1.15557	0	0	0	0.16718	0	0.203169	0	1.60102	3.45111	2.98651	0	-0.17642	0	5.14235	0	0.847426	0.71599	0.267659	0.448331	0.0112096
2022	K31610086D	SAER MEDICAL	FARMACI	1.65301	0.642396	0.161418	0.128777	0.0779045	3.42466	0.302815	0.334421	0.266796	3.57429	0	0.508257	0.447801	0.749156	0	12.8867	1.44036	0.6144	0.430619	0.430619	0.404209	0	0	0.404209	0.595791	0.67844	0	0	0	0.119871	0	0.0704396	0	2.07177	3.47735	5.12551	0	-0.178814	0	4.85939	0	0.830553	0.625032	0.248346	0.376686	0.17406
2021	K61524007C	MEGA STORE (ish "MEDICAMENTA I")	FARMACI	1.73743	0.874776	0.0516898	0.0437944	0.0252064	2.27559	0.0423199	0.0677004	0.0573595	0.144383	0.555352	0.259671	0.351953	0.10746	0	1.58077	0.834816	0.960151	0.00139555	0.00296611	0.837025	0.384071	0.264003	0.393819	0.162975	5.13591	2.35662	1.6199	0.661337	0.288701	0	0.221243	12.6809	1.30974	8.03648	1.56476	0	-0.1915	0	4.18352	0.103285	0.706891	0.705723	0.378125	0.327598	0.00116811
2022	K61524007C	MEGA STORE (ish "MEDICAMENTA I")	FARMACI	1.70389	0.859962	0.0824861	0.0700619	0.0411189	1.29669	0.0520262	0.0627737	0.0533186	0.306628	0.91799	0.380651	0.390108	0.0999702	0	2.05476	0.474279	1.12123	0.00411253	0.00682231	0.863323	0.296401	0.208337	0.520417	0.136677	6.31653	2.16863	1.5243	0.494804	0.76674	0	0.263783	13.1026	0.761022	5.56804	0.881503	0	-0.199506	0	2.45561	0.0580819	0.830328	0.826778	0.583506	0.243272	0.00355044
2021	K71709015R	AGROTAL 1	FARMACI	0	0	0	0	0	0	-0.0175521	-0.017488	-0.016189	-0.0332625	0	0.0152027	0.0140221	-0.0140994	279.747	1.79497	0.308304	0	0.00010846	0.000187712	2.15454	0.909654	0.909654	1.24488	-1.15454	-1.86615	-0.787894	-0.787894	0.580092	0	0	0	0	0	0	0	0	0	0	0	0	0.383802	0	0	0	0.00023368
2022	K71709015R	AGROTAL 1	FARMACI	1.66299	0.964893	0.134701	0.114496	0.0688495	0.836079	0.0667182	0.0677219	0.0575636	0.123805	0	-0.0587193	-0.0506623	0.055801	-81.6638	1.59551	0.316094	0.000885117	0.0196276	0.035068	2.13622	0.940578	0.940578	1.19565	-1.13622	-1.88011	-0.827811	-0.827811	0.572944	0.00210497	0	0	0	0.502756	-0.44248	0.235348	0	-0.20031	0	-0.615632	0	0.378995	0.00105829	0.00105829	0	0.0419289
2021	K92114006G	ELECTRAL	FARMACI	1.0798	-4.16434	0.00144445	0.0358626	0.0332123	0.0655321	-0.00458163	8.76624e-05	0.00217647	-0.0401035	0	-0.112941	0.0536519	-0.0125916	15.7458	0.308304	2.00076	0	0.00571773	0.0150764	0.959433	0.122437	0	0.363864	0.0405666	23.6508	3.01817	0	0.191825	0	0	0.787449	0	0.0606891	1.49604	0.0632552	0	-0.841817	0	0.166663	0	0.728006	0.235256	0	0.235256	0.00548578
2022	K92114006G	ELECTRAL	FARMACI	1	45.9757	-5.83822	-6.00338	-6.00338	0.0202906	-0.121218	-0.118461	-0.121812	-1.05667	0	1.55954	1.56718	-0.371642	-0.300441	0.31698	2.22854	0	0.00235411	0.00777844	1.07773	0.074641	0	0.32617	-0.0777269	-13.8656	-0.960297	0	0.152639	0	0	1.97463	0	0.0202906	-0.26105	0.0188272	0	-6.70233	0	0.0506364	0	0.726882	0.202743	0	0.202743	0.00253709
2021	K51612031J	TRIMED	FARMACI	0	0	0	0	0	0	0	0	0	0	0	0	0	0	0	2.00076	0.664596	1.18604	0.08988	0.142166	0.797871	0.681681	0.29344	0.50443	0.202129	3.94733	3.3725	1.45175	0.226571	0	0	0	0	0	0	0	0	0	0	0	0	0.933515	0.598273	0.598273	0	0.0717126
2022	K51612031J	TRIMED	FARMACI	0	0	0	0	0	0	0	0	0	0	0	0	0	0	0	2.22854	0.542051	1.04346	0.0848202	0.119604	0.825732	0.633277	0.240144	0.585588	0.174268	4.73829	3.63393	1.37801	0.297907	0	0	0	0	0	0	0	0	0	0	0	0	0.92846	0.611041	0.611041	0	0.0700388
2019	K21511002I	ALMedical	FARMACI	10.3888	0.798982	-9.61651	4.85592	0.46742	0.296899	-0.278429	-0.274829	0.138777	-78.5426	0	-0.299482	0.14927	-11.0395	0	1.85063	36.7775	2.73137	0.0837688	0.23349	0.0702991	0.0450781	0.0450781	0.0252211	0.929701	0.0756148	0.0484866	0.0484866	0.0786401	2.41046	0	4.00117	0	0.0285789	0.0307398	0.406532	0	-1.10179	0	0.0294253	0	0.996455	0.990566	0.0688881	0.921678	0.00588887
2020	K21511002I	ALMedical	FARMACI	1.46888	0.859651	0.480554	0.408471	0.278083	0.715648	0.22877	0.234129	0.199009	98.7909	0	0.235986	0.205287	7.48132	0.574913	1.58552	29.6924	2.93421	2.65222	2.65222	0.0305788	0	0	0.0305788	0.969421	0.0315434	0	0	0	0.184162	0	0.0172806	0	0.487206	0.502574	15.9328	0	-0.0334311	0	0.503777	0	0.997684	0.916583	0.0897248	0.826858	0.0811017
2021	J74304623M	INFINIT SH.P.K	FARMACI	1.53155	0.622246	0.136711	0.115769	0.0755897	0.462172	0.0344103	0.041255	0.0349354	0.350792	0.503068	0.0403435	0.0409592	0.467844	8.78824	39.5088	4.6947	7.56767	0.186041	0.371994	0.147067	0.0735555	0.073516	0.0735508	0.852933	0.172425	0.0862383	0.086192	1.33431	1.84449	0.0225572	1.02984	4.34543	0.301768	0.3538	2.05191	0.0416065	-0.309058	0.242783	0.364297	0.0694448	0.901907	0.874546	0.556608	0.317939	0.0273605
2022	J74304623M	INFINIT SH.P.K	FARMACI	1.51731	0.558391	0.0607346	0.0495143	0.0326331	0.385592	0.00890024	0.0154344	0.012583	0.101824	0.198444	0.010714	0.0151473	0.0705377	26.067	32.6266	3.02985	4.20278	0.0207818	0.0278825	0.169289	0.0580488	0.0431119	0.126177	0.830711	0.203788	0.0698784	0.0518975	2.02747	2.08671	0.0159212	1.46839	4.00781	0.254129	0.305918	1.50116	0.033223	-0.396248	0.0979509	0.323149	0.0634084	0.912592	0.909074	0.530294	0.378779	0.00351814
2021	L71806043L	TURK MED sh.p.k	FARMACI	1.40485	0.695139	0.380548	0.321857	0.229104	0.96035	0.260141	0.260141	0.220021	42.3363	0	0.516981	0.437248	0.523628	1	12.2624	1.28965	0.710837	0.0379029	0.0379029	0.496806	0.0012713	0	0.496806	0.503194	0.987306	0.00252646	0	0	0.516603	0	0	0	0.683597	1.35852	1.37598	0	-0.213119	0	1.37531	0	0.993855	0.814118	0.353148	0.460969	0.0188304
2022	L71806043L	TURK MED sh.p.k	FARMACI	1.33548	0.794852	0.530154	0.447762	0.335283	0.846202	0.335923	0.335923	0.283717	101.772	0	0.549808	0.464362	0.863519	1.14463	7.23263	2.11681	0.445293	0.0294114	0.0294114	0.389017	0	0	0.389017	0.610983	0.636706	0	0	0	0.273386	0	0	0	0.633634	1.03707	1.62881	0	-0.128549	0	1.04271	0	0.996699	0.772346	0.173226	0.599119	0.0114415
2021	M03225202Q	CENTRE SOLUTIONS Shpk	FARMACI	1.47524	-1.29592	-0.883008	-0.883008	-0.59855	0.0400259	-0.0239575	-0.0239575	-0.0239575	-0.13023	0	-0.0248821	-0.0248821	-0.64476	0	2.00049	11.0262	10.9355	11.0262	11.0262	0.0371573	0	0	0.0371573	0.962843	0.0385913	0	0	0	14.9764	0	0	0	0.0271317	0.0281788	0.730186	0	-1.40776	0	0.0348343	0	0.816037	0.406335	0.406335	0	0.409702
2022	M03225202Q	CENTRE SOLUTIONS Shpk	FARMACI	1.21638	0.382717	0.496742	0.496742	0.408379	1.46818	0.599573	0.599573	0.599573	3.57553	6.1126	0.60161	0.60161	177.082	-0.0164771	2.5621	189.204	56.6169	7.45621	7.45621	0.00338585	0	0	0.00338585	0.996614	0.00339735	0	0	0	0.158819	0	0	12.3054	1.20701	1.21111	356.487	0	-0.286883	0	1.45611	0.098088	0.832312	0.807067	0.191696	0.61537	0.0252456
2021	M07108401J	TETEA	FARMACI	1.85916	0.841753	-0.0178289	-0.0178289	-0.00958976	0.254183	-0.00243755	-0.00243755	-0.00243755	0	0	0.0145347	0.0145347	-0.00208747	67.8008	21.9617	0.605999	0.250382	0.0549657	0.0549657	1.16771	0	0	1.16771	-0.167706	-6.96283	0	0	0	2.13849	0.0623889	4.10003	0	0.136719	-0.815232	0.117083	0.133418	-0.158666	0.054967	-0.815232	0	1	0.935816	0.292372	0.643444	0.0641837
2022	M07108401J	TETEA	FARMACI	1.92837	0.968307	0.037718	0.037718	0.0195595	1.93477	0.0378431	0.0378431	0.0378431	0	0	-1.76611	-1.76611	0.0370493	-1.56622	245.821	0.621642	0.35738	0.108458	0.108458	1.02143	0	0	1.02143	-0.0214274	-47.6693	0	0	0	0.363831	1	0.184756	0	1.00332	-46.8241	0.982269	0.363831	-0.0339074	0.378613	-46.8241	0	1	0.889218	0.365037	0.52418	0.110782
2021	L82321021V	FROG	FARMACI	1	1.05126	-0.406295	-0.406295	-0.406295	0.00800907	-0.00325404	-0.00325404	-0.00325404	-0.104558	-0.141618	-1.0141	-1.0141	-0.00326452	0	0.85638	0.869242	0.102755	0.0193095	0.0193095	0.996791	0	0	0.996791	0.00320881	310.642	0	0	0	12.7887	0	53.8225	0.34856	0.00800907	2.49596	0.00803486	0	-2.04677	0	-0.286929	0.0229776	0.968878	0.949631	0.102426	0.847205	0.0192476
2022	L82321021V	FROG	FARMACI	0	0	0	0	0	0	-0.00344324	-0.00341609	-0.00341609	-0.145563	-0.155647	18.1417	17.9987	-0.00344258	0.957754	0.979022	0.873196	0.102964	0.0215369	0.0215369	1.00019	5.48016e-05	0	1.00019	-0.000189797	-5269.8	-0.288739	0	0	0	0	0	0	0	0	0	0	0	0	0	0.0219476	0.976345	0.954804	0.102984	0.851821	0.021541
2021	L98401701L	BIM inc	Autovetura	1.31377	-0.328304	0.136911	0.136911	0.104212	1.20073	0.104188	0.12513	0.12513	2.44926	0	0.132359	0.158964	1.13426	3.72276	0.971997	9.82959	0.593945	3.97845	9.21846	0.212839	0.120983	0.120983	0.0918557	0.787161	0.270387	0.153695	0.153695	0.351608	0.0596935	1	0	0	0.913956	1.16108	4.29413	0.0596935	-0.526402	0	1.05586	0	0.957461	0.110693	0.0545572	0.0561362	0.846768
2022	L98401701L	BIM inc	Autovetura	1.34254	0.240031	0.268201	0.268201	0.199771	1.25883	0.230289	0.251477	0.251477	8.93333	0	0.271645	0.296638	2.35143	1.78011	0.97616	8.90829	1.03929	5.27984	8.2077	0.152244	0.0543087	0.0543087	0.0979356	0.847756	0.179585	0.0640618	0.0640618	0.474667	0.108552	1	0.0534066	0	0.937642	1.10603	6.1588	0.108552	-0.366657	3.72665	1.07002	0	0.974221	0.170395	0.101783	0.0686121	0.803826
2021	L61503051A	Eurasia	Autovetura	1.92652	1	0.073483	0.073483	0.0381429	0.563426	0.0214907	0.0214907	0.0214907	0	0	-0.168358	-0.168358	0.0208937	-23.2125	10.4235	0.321651	0.650566	0.216295	0.237129	1.12765	0	0	1.02858	-0.127649	-8.83399	0	0	0	2.28804	0	0.0386454	0	0.292458	-2.29112	0.259352	0	0	0	-10.2342	0	1	0.756095	0.669158	0.0869376	0.243905
2022	L61503051A	Eurasia	Autovetura	2.98664	1	-0.986644	-0.986644	-0.330352	0.109918	-0.0363115	-0.0363115	-0.0363115	0	0	0.265687	0.265687	-0.0757341	10.378	9.94758	0.213599	1.87208	0.0102518	0.0243043	1.13667	0	0	0.47946	-0.13667	-8.31688	0	0	0	24.389	0	0	0	0.036803	-0.269283	0.0323779	0	0	0	0.0707017	0	1	0.988347	0.897588	0.0907594	0.0116529
2021	K67018001N	Eni D	Autovetura	1.43362	-8.0937	-9.92242	-9.92242	-6.92124	0.00540205	-0.0381753	-0.0373889	-0.0373889	-0.0708234	-0.314647	-0.181551	-0.177811	-0.0498707	0	0.972217	0.46473	0.137475	0.0155931	0.0160869	0.789727	0.170218	0	0.765486	0.210273	3.75573	0.809511	0	22.2351	27.9278	0	89.9851	0.0317107	0.00376812	0.0179202	0.00477142	0	-10.2854	0	-0.0123745	0.118828	0.460979	0.448665	0.105235	0.34343	0.0123143
2022	K67018001N	Eni D	Autovetura	1.15082	-0.0619589	0.55459	0.543137	0.471958	0.157711	0.0760023	0.0760023	0.0744327	0.157147	0.68639	0.285386	0.279492	0.10681	0	2.08568	0.618794	0.106879	0.0182007	0.0187665	0.733686	0.146941	0	0.711563	0.266314	2.75497	0.551757	0	21.8615	0.554948	0	3.08621	1.26375	0.137042	0.514589	0.186786	0	-0.355873	0	-0.702056	0.108441	0.516362	0.503008	0.0760513	0.426957	0.0133536
2021	M11307035F	Autoalb Tent	Autovetura	2.82723	31.9287	-118.928	116.315	41.1407	0.00517959	-0.221285	-0.21788	0.213092	-0.304752	0	-0.55171	0.531283	-0.740267	0	0.602205	0.916232	0	0.243366	0.487594	0.598911	0.388173	0.299985	0.298926	0.401089	1.49321	0.967797	0.747925	2.42051	0	0	33.6601	0	0.00183203	0.00456764	0.00305894	0	-116.242	0	-0.0731627	0	0.273885	0.111499	0	0.111499	0.145754
2022	M11307035F	Autoalb Tent	Autovetura	1.24692	0	0.292028	0.248209	0.199058	0.24483	0.063842	0.0573392	0.0487354	0.0774874	0	0.257947	0.19691	0.0989852	2.16682	0.725673	0.273035	0	0.12694	0.148104	0.752499	0.107534	0.107534	0.644966	0.247501	3.04039	0.434478	0.434478	7.66181	0	0	0.0590351	0	0.196348	0.793325	0.260928	0	-0.494175	0	-0.418772	0	0.176098	0.0796344	0	0.0796344	0.0955221
2020	L21410012I	JUPITER PRINT & PROMOTION	Autovetura	1.69741	0.890044	0.175474	0.12737	0.0750379	3.28084	0.334092	0.339164	0.246187	188.605	0	0.542827	0.4	0.868826	-0.479067	0.916232	1.27967	1.31628	0.0939851	0.0939851	0.384533	0	0	0.384533	0.615467	0.624782	0	0	0	0.261869	0	0.235888	0	1.93285	3.14046	5.02649	0	-0.124858	0	3.14953	0	0.998229	0.962088	0.506153	0.455936	0.0361404
2021	L21410012I	JUPITER PRINT & PROMOTION	Autovetura	1.6826	0.88727	0.200042	0.170036	0.101055	1.81364	0.215621	0.215621	0.183278	400.008	0	0.581867	0.494587	0.342565	0.212934	0.273035	0.987993	0.599884	4.12302e-05	4.12302e-05	0.629432	0	0	0.629432	0.370568	1.69856	0	0	0	0.350305	0	0.576919	0	1.07788	2.90872	1.71246	0	-0.11778	0	2.91296	0	0.999461	0.999435	0.377586	0.621849	2.59516e-05
2020	K34001001L	JOSIF DELIUA	Autovetura	2.89431	0.949282	-1.47762	0.401486	0.138716	0.616978	-0.316836	-0.314982	0.0855845	-0.431632	0.141472	-0.440547	0.119002	-1.12828	1.14909	2.59595	0.68433	0.262772	0.223057	0.223057	0.280813	0	0	0.280813	0.719187	0.39046	0	0	0	0.346156	0.0924784	0.131147	0.352371	0.21317	0.296404	0.759115	0.032012	-0.574614	0.172872	-14.3506	0.604958	0.265959	0.203322	0.07379	0.129532	0.0626373
2021	K34001001L	JOSIF DELIUA	Autovetura	1.28294	0.71208	0.247189	0.4791	0.373439	0.329123	0.0613577	0.0634133	0.122907	0.0834504	0.197618	0.0687743	0.137763	0.568973	1.60066	1.58788	1.88016	0.574795	0.677088	0.677088	0.107839	0	0	0.107839	0.892161	0.120875	0	0	0	0.241624	0.117754	0.0822178	0.412478	0.256538	0.287547	2.37889	0.0284521	-0.461857	0.168142	1.63503	0.621943	0.264741	0.191724	0.0619856	0.129738	0.0730168
2021	M11424016S	O-SP Albania	Autovetura	1.80814	0.680353	-0.455799	0	0	2.26845	-0.571834	-0.571834	0	0	0	-0.823793	0	-1.86965	0	0.947102	3.26956	0	0.0657361	0.0657361	0.305852	0	0	0.305852	0.694148	0.440614	0	0	0	0	0	0.0181888	0	1.25458	1.80736	4.10191	0	-0.647655	0	1.80736	0	1	0.979894	0	0.979894	0.0201055
2022	M11424016S	O-SP Albania	Autovetura	1.53753	0.7593	0.0160606	0	0	2.16975	0.0226646	0.0226646	0	0.0571856	0	0.0663127	0	0.0344334	0	2.45495	0.917123	0	0.016319	0.016319	0.658216	0	0	0.658216	0.341784	1.92583	0	0	0	0	0	0.0959574	0	1.41119	4.12891	2.14397	0	-0.446409	0	-25.8694	0	0.603666	0.592924	0	0.592924	0.0107415
2021	L23807003K	Pirro Oil	Autovetura	0	0	0	0	0	0	0	0	0	0	0	0	0	0	0	3.26956	1.28113	1.32264	0.451906	0.741332	0.613302	0.239441	0.239441	0.37386	0.386698	1.58599	0.619194	0.619194	0.110911	0	0.231291	0	0	0	0	0	0	0	0.337894	0	0	0.973443	0.696289	0.494482	0.201807	0.277155
2022	L23807003K	Pirro Oil	Autovetura	0	0	0	0	0	0	0	0	0	0	0	0	0	0	0	0.917123	0.991403	2.49275	0.0760288	0.142615	0.520842	0.309814	0.243178	0.277664	0.479158	1.08699	0.646579	0.507511	0.133967	0	0	0	0	0	0	0	0	0	0	0	0	0.967422	0.927823	0.692145	0.235678	0.039599
2021	M26614003A	ITD TRADE	Autovetura	0	0	0	0	0	0	0	0	0	0	0	0	0	0	0	2.60376	0	0	0	0	0	0	0	0	0	0	0	0	0	0	0	0	0	0	0	0	0	0	0	0	0	0	0	0	0	0
2022	M26614003A	ITD TRADE	Autovetura	1.95732	0.993129	0.0215165	0.018289	0.00934391	37.6626	0.414018	0.414018	0.351916	20.2791	23.0897	0.625021	0.531268	1.22638	0	3.48415	1.56028	1.34139	1.42209	1.42209	0.337593	0	0	0.337593	0.662407	0.509646	0	0	0	0.0235342	0	0.000482472	1262.49	19.2419	29.0485	56.9974	0	-0.0211652	0	29.9723	0.0152412	0.979584	0.499498	0.452843	0.0466547	0.480086
2021	L06402006B	Velntini B 2010	Autovetura	0	0.925117	0	0	0.00629659	1.77955	-1.87747	-1.87747	0.0112051	-37.7175	0	-8.94664	0.0533949	-2.37611	0	0	0.1817	1.02089	0.124711	0.124711	0.790147	0.206396	0	0.790147	0.209853	3.76525	0.983529	0	0	0	0	0	0	0	0	0	0	0	0	0	0	0.950223	0.851683	0.806653	0.0450298	0.0985399
2022	L06402006B	Velntini B 2010	Autovetura	0	0.92255	0	0	0.00910478	2.25805	-2.42372	-2.42372	0.0205591	-51.2845	0	-10.0179	0.0849764	-3.19726	0	2.90167	0.179431	1.07738	0.0137114	0.0137114	0.758062	0.217733	0	0.758062	0.241938	3.13328	0.899952	0	0	0	0	0	0	0	0	0	0	0	0	0	0	0.95274	0.942346	0.81672	0.125626	0.0103941
2021	M02326039S	Premium Construction	Autovetura	0	0	0	0	0	0	-1224.18	-1224.18	0	0	0	1.68478	0	-1.68246	0	1.20259	0.00137436	0	0.00137436	0.00137436	727.614	0	0	727.614	-726.614	-1.00138	0	0	0	0	0	0	0	0	0	0	0	0	0	0	0	1	0	0	0	1
2022	M02326039S	Premium Construction	Autovetura	0	0	0	0	0	0	-0.0178382	-0.0178382	0	0	0	-0.0198599	0	-0.175235	0	1.25681	9.82355	0	4.21475	4.21475	0.101796	0	0	0.101796	0.898204	0.113333	0	0	0	0	0	0	0	0	0	0	0	0	0	0	0	1	0.570954	0	0.570954	0.429046
2021	L21508008T	WinPharma	Autovetura	0	0	0	0	0	0	0	0	0	0	0	0	0	0	0	0.00137436	0.966612	0.405913	0.574151	0.574151	0.719321	0.247597	0	0.719321	0.280679	2.56279	0.882135	0	0	0	1	0	0	0	0	0	0	0	0	0	0.0125726	0.987286	0.574287	0.291982	0.282305	0.412999
2022	L21508008T	WinPharma	Autovetura	0	0	0	0	0	0	0	0	0	0	0	0	0	0	0	9.82355	0.847891	0.508158	0.229147	0.232168	0.700163	0.0121507	0.00911165	0.691051	0.299837	2.33514	0.0405244	0.0303887	6.86246	0	1	0	0	0	0	0	0	0	0	0	0.0625284	0.9371	0.723469	0.351163	0.372305	0.16044
2022	M12409002V	Telia Kurti	Autovetura	1.98921	1	0.0102821	0.0102821	0.00516892	1.10236	0.00569799	0.00569799	0.00569799	0	0	1	1	0	0	1.37253	0	0	0.0994413	0	0.994302	0	0	0	0.00569799	174.5	0	0	0	0.254847	0	0.22398	0	0.554168	97.2568	0.557344	0	-0.0108381	0	0.554168	0	1	0.901125	0.141228	0.759897	0.0988747
2023	M12409002V	Telia Kurti	Autovetura	1.72741	0.996451	0.251858	0.251858	0.145801	6.51472	0.949853	0.949853	0.949853	0	0	0.991044	0.991044	0	0.00903643	1.35605	0	0	6.44531	0	0.0415634	0	0	0	0.958437	0.0433658	0	0	0	0.00489929	0	0.175394	0	3.77138	3.93493	90.738	0	-0.0207312	0	3.77138	0	1	0.732111	0.0184771	0.713634	0.267889
2022	K41809002J	Jurgen-X.XL	Autovetura	1.84999	0.907346	-0.0396162	-0.0405707	-0.0219302	0.611337	-0.0282398	-0.0130914	-0.0134068	-0.181374	-0.194761	-0.0639715	-0.0303703	-0.0505585	0	0	1.00111	0.510467	0.00425772	0.00425772	0.558557	0.386189	0	0.558557	0.441443	1.2653	0.874833	0	0	0.862827	0.277284	1.54439	4.80054	0.330454	0.748577	0.591622	0.239248	-0.143785	0.774654	1.15647	0.0688369	0.844301	0.841922	0.285125	0.556798	0.00237818
2023	K41809002J	Jurgen-X.XL	Autovetura	1.72877	0.870165	-0.0962195	-0.0968053	-0.0559965	0.520873	-0.0517826	-0.0289906	-0.0291671	-0.418604	-0.39609	-0.110908	-0.0624698	-0.0971346	0	0	1.13915	0.504623	0.00437678	0.00437678	0.533101	0.356217	0	0.533101	0.466899	1.14179	0.762942	0	0	0.892858	0.387566	1.83563	4.09162	0.301296	0.645314	0.565177	0.346041	-0.2918	0.705835	0.877914	0.0736374	0.876297	0.873964	0.269015	0.604949	0.00233327
2021	L81329028A	Brand & KO	Autovetura	1.40485	0.695139	0.380548	0.321857	0.229104	0.96035	0.260141	0.260141	0.220021	42.3363	0	0.516981	0.437248	0.523628	1.26945	1.51158	1.28965	0.710837	0.0379029	0.0379029	0.496806	0.0012713	0	0.496806	0.503194	0.987306	0.00252646	0	0	0.516603	0	0	0	0.683597	1.35852	1.37598	0	-0.213119	0	1.37531	0	0.993855	0.814118	0.353148	0.460969	0.0188304
2022	L81329028A	Brand & KO	Autovetura	1.33548	0.794852	0.530154	0.447762	0.335283	0.846202	0.335923	0.335923	0.283717	101.772	0	0.549808	0.464362	0.863519	1.14463	1.64377	2.11681	0.445293	0.0294114	0.0294114	0.389017	0	0	0.389017	0.610983	0.636706	0	0	0	0.273386	0	0	0	0.633634	1.03707	1.62881	0	-0.128549	0	1.04271	0	0.996699	0.772346	0.173226	0.599119	0.0114415
2021	L86725002J	PIACA MARKET	Autovetura	1.47524	-1.29592	-0.883008	-0.883008	-0.59855	0.0400259	-0.0239575	-0.0239575	-0.0239575	-0.13023	0	-0.0248821	-0.0248821	-0.64476	0	2.00049	11.0262	10.9355	11.0262	11.0262	0.0371573	0	0	0.0371573	0.962843	0.0385913	0	0	0	14.9764	0	0	0	0.0271317	0.0281788	0.730186	0	-1.40776	0	0.0348343	0	0.816037	0.406335	0.406335	0	0.409702
2022	L86725002J	PIACA MARKET	Autovetura	1.21638	0.382717	0.496742	0.496742	0.408379	1.46818	0.599573	0.599573	0.599573	3.57553	6.1126	0.60161	0.60161	177.082	-0.0164771	2.5621	189.204	56.6169	7.45621	7.45621	0.00338585	0	0	0.00338585	0.996614	0.00339735	0	0	0	0.158819	0	0	12.3054	1.20701	1.21111	356.487	0	-0.286883	0	1.45611	0.098088	0.832312	0.807067	0.191696	0.61537	0.0252456
2021	M27301202B	TRIPS 4FUN	Autovetura	1.85916	0.841753	-0.0178289	-0.0178289	-0.00958976	0.254183	-0.00243755	-0.00243755	-0.00243755	0	0	0.0145347	0.0145347	-0.00208747	67.8008	21.9617	0.605999	0.250382	0.0549657	0.0549657	1.16771	0	0	1.16771	-0.167706	-6.96283	0	0	0	2.13849	0.0623889	4.10003	0	0.136719	-0.815232	0.117083	0.133418	-0.158666	0.054967	-0.815232	0	1	0.935816	0.292372	0.643444	0.0641837
2022	M27301202B	TRIPS 4FUN	Autovetura	1.92837	0.968307	0.037718	0.037718	0.0195595	1.93477	0.0378431	0.0378431	0.0378431	0	0	-1.76611	-1.76611	0.0370493	-1.56622	245.821	0.621642	0.35738	0.108458	0.108458	1.02143	0	0	1.02143	-0.0214274	-47.6693	0	0	0	0.363831	1	0.184756	0	1.00332	-46.8241	0.982269	0.363831	-0.0339074	0.378613	-46.8241	0	1	0.889218	0.365037	0.52418	0.110782
2021	M22317039V	CONCEPT HOME	Autovetura	1	1.05126	-0.406295	-0.406295	-0.406295	0.00800907	-0.00325404	-0.00325404	-0.00325404	-0.104558	-0.141618	-1.0141	-1.0141	-0.00326452	0	0.85638	0.869242	0.102755	0.0193095	0.0193095	0.996791	0	0	0.996791	0.00320881	310.642	0	0	0	12.7887	0	53.8225	0.34856	0.00800907	2.49596	0.00803486	0	-2.04677	0	-0.286929	0.0229776	0.968878	0.949631	0.102426	0.847205	0.0192476
2022	M22317039V	CONCEPT HOME	Autovetura	0	0	0	0	0	0	-0.00344324	-0.00341609	-0.00341609	-0.145563	-0.155647	18.1417	17.9987	-0.00344258	0.957754	0.979022	0.873196	0.102964	0.0215369	0.0215369	1.00019	5.48016e-05	0	1.00019	-0.000189797	-5269.8	-0.288739	0	0	0	0	0	0	0	0	0	0	0	0	0	0.0219476	0.976345	0.954804	0.102984	0.851821	0.021541
2021	L71414034R	VIER CREATIVE	Autovetura	1	0	-0.663199	-0.663199	-0.663199	1.57907	-1.04724	-1.04724	-1.04724	-3.99101	0	1.94398	1.94398	-0.680596	0.864254	0.971997	0.479364	0	0.032161	0.032161	1.53871	0	0	1.53871	-0.538708	-2.85629	0	0	0	0	0	0.12365	0	1.57907	-2.93122	1.02623	0	-1.6632	0	-1.97111	0	0.737601	0.688115	0	0.688115	0.0494863
2022	L71414034R	VIER CREATIVE	Autovetura	1	0	0.76629	0.76629	0.76629	3.50814	2.68825	2.68825	2.68825	10.6695	0	3.30401	3.30401	14.4245	-0.697337	0.97616	4.01383	0	0.0228243	0.0228243	0.186367	0	0	0.186367	0.813633	0.229055	0	0	0	0	0	0.0682345	0	3.50814	4.3117	18.8239	0	-0.23371	0	6.24583	0	0.748044	0.743791	0	0.743791	0.00425368
2021	M31324020A	RENT CAR BLINI & TRAVEL US 2	Autovetura	1.06298	-0.490675	0.621947	0.590849	0.555841	0.282709	0.162019	0.165412	0.157141	0.204391	0.212162	0.387125	0.375471	0.27863	0.361527	0.479364	0.356521	0	0.0937346	0.0937346	0.581482	0	0	0.581482	0.418518	1.38938	0	0	0	0	0	0	0.359079	0.265958	0.635477	0.45738	0	-0.302313	0	-0.710793	0.740668	0.207311	0.152806	0	0.152806	0.054505
2022	M31324020A	RENT CAR BLINI & TRAVEL US 2	Autovetura	1.06174	-0.413346	0.757716	0.642309	0.604962	0.63441	0.427178	0.452752	0.383794	0.675858	0.671376	0.49074	0.4409	3.29813	0.850973	4.01383	2.84082	0	2.04444	2.04444	0.129521	0	0	0.129521	0.870479	0.148793	0	0	0	0	0	0	1.04525	0.597522	0.686429	4.61331	0	-0.137749	0	2.50612	0.571653	0.367947	0	0	0	0.264799
2021	M31501015P	Mason Cars	Autovetura	1.78105	0.919239	0.0573766	0.0487453	0.0273688	5.24527	0.161169	0.168976	0.143557	1.3017	0	0.511792	0.455864	0.260398	0.599119	0.356521	0.754899	0.660739	0.0402663	0.0445701	0.685089	0.18826	0.0661551	0.618934	0.314911	2.1755	0.59782	0.210075	1.87157	0.138862	0	0.148514	0	2.94504	9.35195	4.29877	0	-0.158919	0	11.448	0	0.876186	0.846639	0.408953	0.437685	0.027586
2022	M31501015P	Mason Cars	Autovetura	1.7642	0.917617	0.059849	0.0507322	0.0287565	5.02996	0.0756238	0.170637	0.144644	0.669824	0	0.158802	0.303737	0.161028	1.67106	2.84082	0.787391	1.10154	0.0668744	0.074586	0.523786	0.183733	0.0541556	0.46963	0.476214	1.0999	0.385821	0.113721	2.08475	0.181443	0	0.104086	0	2.85113	5.98707	5.44331	0	-0.171583	0	6.82956	0	0.887099	0.849795	0.517317	0.332478	0.0350279
2021	M31917041E	AKasa 2023 Sh.p.k	Autovetura	1.24679	-0.229541	0.295708	0.295708	0.237176	0.735487	0.165521	0.17444	0.17444	0.224232	0	0.230069	0.242466	0.589968	0.178479	1.41564	0.933259	0	0.566064	0.566064	0.280559	0.257134	0	0.280559	0.719441	0.389968	0.357408	0	0	0	0	0.174638	0	0.589906	0.819951	2.10261	0	-0.442386	0	-31.5041	0	0.261834	0.10302	0	0.10302	0.158814
2022	M31917041E	AKasa 2023 Sh.p.k	Autovetura	1.38798	0.190868	0.17456	0.17456	0.125766	1.33554	0.167965	0.167965	0.167965	0.214087	0	0.179257	0.179257	2.66641	1.30829	1.88893	3.42001	0	3.25024	3.25024	0.0629929	0.0482909	0	0.0629929	0.937007	0.0672278	0.0515374	0	0	0	0	0.0111144	0	0.96222	1.02691	15.275	0	-0.437462	0	6.31198	0	0.215436	0.0106945	0	0.0106945	0.204742
2021	L43315005H	AGRO - HARIZI (ish "HARIZI")	Autovetura	1.91604	0.98319	0.0643647	0.0544984	0.0284433	2.5658	0.0784668	0.0861919	0.0729797	0.239247	0.337283	0.473309	0.440211	0.171481	0	0.933259	0.752476	0.716168	0.00525196	0.00957482	0.834217	0.123472	0	0.457583	0.165783	5.03197	0.74478	0	0.870803	0.244718	0.0147597	0.188125	6.18887	1.33912	8.07751	1.60524	0.00361197	-0.0321657	0.0204101	6.24461	0.216375	0.672026	0.667645	0.327706	0.339939	0.00438127
2022	L43315005H	AGRO - HARIZI (ish "HARIZI")	Autovetura	1.94659	0.978818	0.0226311	0.0183397	0.00942146	1.96787	0.00496706	0.0228784	0.0185402	0.0210893	0.115458	0.0335755	0.125325	0.00852024	0	3.42001	0.741112	0.570231	0.00429391	0.00627592	0.852063	0.0968001	0	0.582972	0.147937	5.75964	0.654335	0	0.875258	0.328835	0.02462	0.334208	6.29552	1.01093	6.83351	1.18645	0.0080959	-0.057708	0.0197744	5.56974	0.160579	0.764476	0.760817	0.332428	0.428389	0.00365868
2021	J71907014E	MURATI BA	NACE Rev.2	1.5955	0.74209	0.196524	0.196524	0.123173	1.66269	0.204799	0.204799	0.204799	1.60418	0	0.222916	0.222916	2.51991	3.08132	1.46864	10.7335	0	2.68055	2.68055	0.0812725	0	0	0.0812725	0.918728	0.088462	0	0	0	0	0	0.0871555	0	1.04211	1.1343	12.8224	0	-0.207975	0	1.31736	0	0.872334	0.654479	0	0.654479	0.217855
2022	J71907014E	MURATI BA	NACE Rev.2	1.50905	0.701962	0.271889	0.23102	0.15309	1.65062	0.297396	0.297396	0.252693	4.16397	0	0.384614	0.326801	1.31146	1.86022	1.31134	4.09485	0	0.136444	0.136444	0.226767	0	0	0.226767	0.773233	0.293272	0	0	0	0	0	0.22927	0	1.09381	1.4146	4.82351	0	-0.219063	0	1.55856	0	0.928579	0.897638	0	0.897638	0.0309411
2021	L71619028E	Olsi motors shpk		1.85288	0.90378	0.0616631	0.0616631	0.0332797	3.31525	0.11033	0.11033	0.11033	7.42149	0	0.253173	0.253173	0.195549	3.21954	10.7335	0.497801	1.24824	0.228182	0.228182	0.56421	0	0	0.56421	0.43579	1.29468	0	0	0	0.393613	0.214346	0.0832429	0	1.78925	4.10575	3.17124	0.0843694	-0.0854616	2.03833	4.25076	0	0.985134	0.856391	0.70427	0.152121	0.128743
2022	L71619028E	Olsi motors shpk		1.86254	0.909756	0.046764	0.046764	0.0251076	2.52989	0.0635197	0.0635197	0.0635197	1.11299	0	0.161629	0.161629	0.104645	5.22574	4.09485	0.488976	1.06444	0.10231	0.10231	0.607002	0	0	0.607002	0.392998	1.54454	0	0	0	0.475681	0	0.172794	0	1.3583	3.45626	2.23772	0	-0.0906967	0	4.04345	0	0.942929	0.880826	0.646119	0.234707	0.0621026
2020	L51419022R	Oltjan Hastoç		1.93973	0.965845	0.0134071	0.0113968	0.00587546	18.5925	0.107045	0.128507	0.109239	0	0	0.182097	0.18583	0.25972	4.38135	1.74604	2.42628	0	1.10416	1.10416	0.412154	0	0	0.412154	0.587846	0.701126	0	0	0	0	0	0.0307655	0	9.58505	16.3054	23.256	0	-0.0446189	0	16.3054	0	1	0.544918	0	0.544918	0.455082
2021	L51419022R	Oltjan Hastoç		1.90683	0.875373	-0.0308141	-0.0320585	-0.0168125	9.06183	-0.14834	-0.146438	-0.152352	0	0	-3.0069	-3.08823	-0.156038	-1.32381	1.55342	1.05189	0	0.252258	0.252258	0.950667	0	0	0.950667	0.0493331	19.2704	0	0	0	0	0	0.0817418	0	4.75231	96.3311	4.99892	0	-0.123587	0	96.3311	0	1	0.760187	0	0.760187	0.239813
2021	L32405034Q	SOKOL RROKAJ		1.89667	0.964011	0.0461033	0.0391556	0.0206444	2.05679	0.0477104	0.0499955	0.0424613	1.40351	0	0.114223	0.101656	0.103772	0	2.42628	0.994931	1.10618	0.00563439	0.00713617	0.582304	0.122544	0.122544	0.45976	0.417696	1.39408	0.29338	0.29338	0.2774	0.468984	0	0.411955	0	1.08442	2.5962	1.8623	0	-0.0551232	0	2.14209	0	0.966006	0.962725	0.508577	0.454148	0.00328093
2022	L32405034Q	SOKOL RROKAJ		1.8734	0.951262	0.0424044	0.0360182	0.0192261	1.18435	0.023489	0.0268079	0.0227705	0.805378	0	0.088956	0.0862349	0.040159	0	1.05189	0.510031	1.1498	0.0118445	0.0149032	0.735948	0.177091	0.151046	0.584902	0.264052	2.78713	0.670665	0.572031	0.193088	1.06378	0	0.441263	0	0.632195	2.3942	0.859022	0	-0.0789494	0	1.63809	0	0.970835	0.962118	0.672517	0.289601	0.0087169
2021	L22319013O	2-MJ		1.71337	0.832091	0.148588	0.126051	0.0735689	0.337815	0.0298174	0.0292961	0.0248527	25.6283	42.7482	0.102862	0.0857347	2.47325	3.11165	2.10111	73.2435	9.60634	0.0163899	0.965398	0.710121	0	0	0.012056	0.289879	2.44972	0	0	0.00166669	0.587399	0	4.19141	339.135	0.197164	0.68016	0.277648	0	-0.140685	0	0.199805	0.000581374	0.998837	0.987198	0.115814	0.871384	0.0116388
2022	L22319013O	2-MJ		1.82271	0.914139	0.0613962	0.0505108	0.0277119	0.489155	0.0148778	0.0164767	0.0135554	13.4891	21.2674	0.0515949	0.0470089	0.711797	7.14632	1.65983	40.9668	6.82332	0.020548	0.699598	0.711642	0	0	0.0209017	0.288358	2.46791	0	0	0.00159676	0.531435	0	2.9611	421.046	0.268366	0.930669	0.377109	0	-0.109933	0	0.274404	0.00063738	0.998897	0.984274	0.142619	0.841655	0.0146228
2021	K41316002G	2KT ALIGJONI		1.3273	0.598079	-0.0367226	-0.0367226	-0.0276671	0.207807	-0.0345497	-0.00574941	-0.00574941	-0.0391143	-0.00739353	-0.0628113	-0.0104524	-0.307423	-61.8285	82.8498	0.00827172	1.0301	0.00206607	0.00827172	0.449945	0.444	0.33756	0.112385	0.550055	0.817999	0.807192	0.613683	2.61673	0.739434	0	0	0.201334	0.156563	0.284632	0.347961	0	-0.525466	0	36.3016	0.777628	0.116698	0.115768	0.115768	0	0.000929616
2022	K41316002G	2KT ALIGJONI		1.85677	0.94044	0.0369711	0.0369711	0.0199116	0.566651	0.000104995	0.0112829	0.0112829	0.000113462	0.0138376	0.000485237	0.052144	0.000959135	0	47.7901	0.272759	0.408885	0.0381034	0.272759	0.78362	0.781687	0.674152	0.109469	0.21638	3.62151	3.61257	3.1156	1.37266	0.146667	0	0	0.374282	0.305181	1.4104	0.389451	0	-0.0696361	0	-8.75699	0.815378	0.0746187	0.0447601	0.0447601	0	0.0298586
2021	K81316005L	3A& K		1.66874	0.898137	0.160251	0.136213	0.0816265	0.924697	0.0867734	0.0887998	0.0754798	0.570244	0.82812	0.0956299	0.0831837	0.936947	7.13058	1.03838	3.84671	5.30786	2.28106	2.28106	0.0926129	0	0	0.0926129	0.907387	0.102065	0	0	0	0.887114	0	0.2384	6.07958	0.554129	0.610687	5.98328	0	-0.167352	0	0.733734	0.0911459	0.847831	0.636576	0.491576	0.145	0.211255
2022	K81316005L	3A& K		1.59283	0.835156	0.114794	0.0975794	0.0612618	0.680392	0.0475061	0.0490354	0.041682	0.298861	0.45327	0.0496325	0.0435477	1.10888	8.04527	0.681644	8.17509	11.4563	4.28414	4.28414	0.0428416	0	0	0.0428416	0.957158	0.0447592	0	0	0	1.149	0	0.361123	4.64514	0.42716	0.44628	9.97068	0	-0.288799	0	0.535153	0.0919585	0.841043	0.657503	0.490809	0.166695	0.18354
2020	K78731511B	A & M		1.84369	0.919525	0.0469713	0.0399256	0.0216553	1.38736	0.0345785	0.0353454	0.0300436	0.11006	0.127361	0.0548522	0.0476584	0.15782	2.2372	9.15457	1.13589	0.110028	0.00459349	0.00774882	0.369605	0	0	0.219101	0.630395	0.586307	0	0	2.08752	0.0320366	0	0	3.18995	0.752489	1.19368	2.03593	0	-0.108318	0	13.9657	0.235894	0.272982	0.271285	0.0241072	0.247177	0.00169778
2021	K78731511B	Á & M		1.901	0.99359	0.03	0.0255	0.013414	1.9977	0.0298575	0.0315261	0.0267971	0.0974796	0.124211	0.0494879	0.0444154	0.115269	3.31928	19.6314	0.988448	0.23205	0.0636433	0.097463	0.39667	0	0	0.259025	0.60333	0.657467	0	0	2.22526	0.0571973	0	0	4.87101	1.05087	1.74178	2.64923	0	-0.067413	0	18.3993	0.215739	0.31614	0.290894	0.0601068	0.230788	0.0252454
2021	K72113010E	A & E ENGINEERING sh.p.k		1.47303	0.638521	0.273268	0.229708	0.155943	1.23066	0.226979	0.228306	0.191913	1.9658	0	0.8302	0.701943	0.312386	0.418537	1.24592	1.01799	0.19938	0.0985694	0.0985694	0.726597	0.0279168	0	0.726597	0.273403	2.65761	0.102109	0	0	0.173399	0	0.79961	0	0.835466	3.05581	1.14983	0	-0.252116	0	5.2898	0	0.884536	0.812916	0.144869	0.668047	0.0716203
2022	K72113010E	A & E ENGINEERING sh.p.k		1.50518	0.771724	0.319319	0.271389	0.180303	1.09358	0.214728	0.231998	0.197175	4.48844	0	0.650512	0.597335	0.320532	0.671224	1.2205	1.26705	0.154272	0.238209	0.238209	0.66991	0	0	0.66991	0.33009	2.02947	0	0	0	0.142247	0	0.948652	0	0.726539	2.20103	1.08453	0	-0.151727	0	2.5741	0	0.95216	0.792582	0.103348	0.689233	0.159578
2021	J61828126T	A.B.A.shpk		1.70768	0.907277	0.105962	0.089843	0.0526112	0.919307	0.0569799	0.0570436	0.0483659	0.337703	0.36135	0.0750801	0.0637298	0.238922	4.48962	1.21737	0.998619	2.48698	0.0559415	0.0565492	0.241079	0.00130144	0	0.238488	0.758921	0.317659	0.00171485	0	65.124	1.10175	0	0.413182	4.02202	0.538338	0.709346	2.23304	0	-0.186243	0	0.908151	0.133848	0.831272	0.817786	0.593114	0.224672	0.0134863
2022	J61828126T	A.B.A.shpk		1.62475	0.89322	0.163414	0.138384	0.0851724	0.789606	0.0797081	0.0794165	0.0672526	0.482419	0.56384	0.106427	0.0897965	0.32685	3.5462	1.42133	0.936653	2.48641	0.178534	0.183797	0.251056	0	0	0.243868	0.748944	0.335213	0	0	22.9854	1.24768	0	0.376472	4.07446	0.485985	0.648893	1.93576	0	-0.212432	0	0.822439	0.119276	0.834774	0.789952	0.606355	0.183597	0.044822
2020	K21915002R	A.E DISTRIBUTION		1.73756	-2.44979	0.0383105	0.0325639	0.0187412	1.66857	-0.0188877	0.0367893	0.0312709	-0.0674811	0.341033	-0.038045	0.0629881	-0.0399331	0	3.4856	0.952218	0.570248	0.0560563	0.0596779	0.503542	0.0305575	0.0305575	0.472985	0.496458	1.01427	0.0615511	0.0615511	9.15966	0.280871	0.98998	0.369358	10.4727	0.960293	1.93429	1.90707	0.278057	-0.166148	0.567564	3.88596	0.0916946	0.720103	0.62441	0.269719	0.354691	0.0282267
2021	K21915002R	A.E DISTRIBUTION		1.69134	3.59704	0.0295969	0.0251574	0.0148742	1.2862	-0.0566867	0.0225074	0.0191313	-0.247651	0.257488	-0.134517	0.0453983	-0.113085	0	3.42306	0.968215	0.570061	0.0515316	0.0594795	0.57859	0.0773133	0.0773133	0.501277	0.42141	1.37299	0.183463	0.183463	2.96065	0.375768	0.808837	0.519867	10.2351	0.760465	1.80457	1.31434	0.303935	-0.174926	0.483155	2.81836	0.0742999	0.771102	0.681099	0.285758	0.39534	0.0298157
2021	L43318602L	A.S.R.-OIL		1.99171	0.967844	0.01	0.0085	0.00426769	10.7465	0.0479496	0.0539561	0.0458627	0.105177	0	0.623618	0.596476	0.0519435	0.606222	1.52247	0.00910758	0.580319	0.00561526	0.00561526	0.923111	0	0	0.923111	0.0768894	12.0057	0	0	0	0.0992842	0	0	0	5.39561	70.1736	5.84503	0	0.00282237	0	-14.2363	0	0.544106	0.538923	0.535699	0.00322379	0.00518351
2022	L43318602L	A.S.R.-OIL		1.98718	0.965442	0.0054596	0.00464066	0.00233531	8.74821	0.024035	0.024035	0.0204297	0.0513419	0	0.303855	0.258277	0.0260994	2.7514	1.53828	0.0134695	0.564079	0.00326963	0.00326963	0.9209	0	0	0.9209	0.0791001	11.6422	0	0	0	0.117997	0	0	0	4.40233	55.6552	4.78047	0	-0.00736464	0	-11.316	0	0.531864	0.528853	0.51946	0.00939302	0.00301101
2021	M11627037P	5 XH GROUP		1.98391	1	0.0160872	0.0160872	0.00810883	43.9411	0.35631	0.35631	0.35631	0	0	1	1	0.553544	0	0.589427	0.925929	0.627615	0.925929	0.925929	0.64369	0	0	0.64369	0.35631	1.80654	0	0	0	0.0182399	0	0	0	22.1487	62.1612	34.409	0	0	0	62.1612	0	1	0.403989	0.403989	0	0.596011
2022	M11627037P	5 XH GROUP		2.00879	1	-0.00878551	-0.00878551	-0.00437354	50.588	-0.221249	-0.221249	-0.221249	0	0	-0.962539	-0.962539	-0.287283	-2.03892	0.577548	0.0152131	1.28325	0.0152131	0.0152131	0.770141	0	0	0.770141	0.229859	3.35049	0	0	0	0.0392435	0	0	0	25.1834	109.56	32.6997	0	0	0	109.56	0	1	0.988284	0.988284	0	0.0117163
2021	K22218003V	ATLANTIK 3		1.72597	0.875323	0.0428707	0.0362287	0.0209904	0.586928	0.00161922	0.0145785	0.0123199	0.00387682	0.0313585	0.00611866	0.0465539	0.00220194	9.81555	1.55354	0.488526	0.303371	0.00110816	0.00110816	0.735363	0.170845	0	0.735363	0.264637	2.77877	0.645584	0	0	0.65603	0.0363199	1.04703	0.865571	0.340058	1.285	0.462435	0.0238269	-0.193053	0.0158609	-2.22214	0.392871	0.582332	0.581517	0.223088	0.358429	0.000814901
2022	K22218003V	ATLANTIK 3		1.69203	0.869316	0.0589843	0.0499986	0.0295494	0.54487	0.00495422	0.0189941	0.0161006	0.0123502	0.0409592	0.0173118	0.056261	0.0069404	8.40692	1.29846	0.564568	0.274373	0.0128424	0.0128424	0.713824	0.10898	0	0.713824	0.286176	2.49435	0.380815	0	0	0.608203	0.0422207	1.15997	0.819208	0.32202	1.12525	0.451121	0.0256787	-0.205382	0.0141256	-2.80097	0.393087	0.598856	0.571495	0.195854	0.375641	0.00916721
2022	L82203011N	Biotek		7.51676	-11.668	-13.9309	-13.9309	-1.85331	0.0953143	-0.176895	-0.176647	-0.176647	-6.27611	0	-0.227725	-0.227405	-0.792522	-3.15312	0.791897	3.55872	0.795177	0.0965267	0.0965267	0.223205	0.00417219	0	0.223205	0.776795	0.287342	0.00537103	0	0	13.9972	0	10.063	0	0.0126802	0.0163238	0.0568097	0	-8.39473	0	0.0169384	0	0.971815	0.950269	0.177488	0.772781	0.0215453
2023	L82203011N	Biotek		1.96458	0.980489	0.00760427	0.00646363	0.00329009	8.75625	0.0338927	0.0338927	0.0288088	1.5051	0	0.0455999	0.0387599	0.132014	12.1428	0.838941	3.80733	0	2.41975	2.41975	0.256737	0.00384083	0	0.256737	0.743263	0.345418	0.00516752	0	0	0	0	0.0770995	0	4.45707	5.99662	17.3605	0	-0.0278188	0	6.18397	0	0.977481	0.356244	0	0.356244	0.621238
2021	L87812902D	HB-GROUP		5.21409	1	-3.23168	0.375443	0.0720054	7.65791	-4.74743	-4.74635	0.551411	0	0	-5.00309	0.581105	-92.9043	0	4.3539	11.9706	7.59884	11.9706	11.9706	0.0511002	0	0	0.0511002	0.9489	0.053852	0	0	0	0.264386	0	0	0	1.46869	1.54779	28.7415	0	-0.0168479	0	1.54779	0	1	0.388302	0.388302	0	0.611698
2022	L87812902D	HB-GROUP		1.12943	0.611161	0.811009	0.0355598	0.0314848	4.53882	3.25586	3.25919	0.142904	53.8416	0	4.67422	0.205158	10.7296	0	3.80733	3.09621	0	1.93538	1.93538	0.303445	0	0	0.303445	0.696555	0.435636	0	0	0	0	0	0.0876527	0	4.01868	5.76936	13.2435	0	-0.0587319	0	6.31784	0	0.939529	0.352248	0	0.352248	0.587281
2021	L21708012H	HEP-2012		1.97175	0.974601	0.0165005	0.0141358	0.00716916	6.333	0.0529974	0.0529974	0.0454023	1.74449	0	0.178342	0.152783	0.0754056	4.90073	19.5694	0.401478	0.978113	0.401478	0.401478	0.702832	0	0	0.702832	0.297168	2.3651	0	0	0	0.214034	0	0	0	3.21186	10.8082	4.56989	0	-0.0117481	0	12.039	0	0.96962	0.687449	0.687449	0	0.282171
2022	L21708012H	HEP-2012		1.97542	0.997589	0.0185609	0.0146038	0.0073928	13.3307	0.125255	0.125255	0.0985515	4.82004	0	0.300886	0.236738	0.214584	2.9066	3.09621	0.318447	1.35021	0.284432	0.284432	0.583711	0	0	0.583711	0.416289	1.40218	0	0	0	0.116789	0	0	0	6.74832	16.2107	11.5611	0	-0.00602371	0	17.29	0	0.974014	0.807987	0.788132	0.019855	0.166026
2021	K22020005B	Herjol Xhangolli		1.00163	1	0.998372	0.0336913	0.0336366	12.5351	12.4943	12.4943	0.421637	0	0	17.9755	0.606607	40.975	1.64852	1.37959	0.128477	3.15101	0.128477	0.128477	0.304926	0	0	0.304926	0.695074	0.438695	0	0	0	0.0767757	0	0	0	12.5147	18.0048	41.0418	0	0	0	18.0048	0	1	0.960824	0.960824	0	0.0391759
2022	K22020005B	Herjol Xhangolli		1.9906	1	0.00940423	0.00940423	0.00472433	24.9585	0.117912	0.117912	0.117912	0	0	0.120309	0.120309	5.91828	7.31192	1.66866	0.319508	49.8728	0.319508	0.319508	0.0199234	0	0	0.0199234	0.980077	0.0203284	0	0	0	0.0792486	0	0	0	12.5382	12.7931	629.321	0	0	0	12.7931	0	1	0.993634	0.993634	0	0.00636568
2022	L61608005C	Malvina Visoka		1.94896	0.962238	0.00978769	0.025083	0.0128699	4.67574	0.0234816	0.0234816	0.0601763	1.39414	0	0.150015	0.384445	0.10392	1.60115	3.27949	3.4085	0.942563	0.168616	0.629423	0.843472	0	0	0.225958	0.156528	5.38864	0	0	0.0272755	0.0887751	0	0.259356	0	2.39909	15.3269	2.8443	0	-0.0412497	0	3.16838	0	0.983157	0.840934	0.21298	0.627954	0.142223
2023	L61608005C	Malvina Visoka		1.91673	1.00478	0.0500863	0.0260439	0.0135877	4.89978	0.128037	0.128037	0.0665766	6.06627	0	0.72827	0.378686	0.282994	1.64071	50.1923	1.90662	0.256989	0.43267	0.788185	0.824191	0	0	0.452435	0.175809	4.68798	0	0	0.0567747	0.0454838	0	0.19548	0	2.55632	14.5403	3.10161	0	-0.0331798	0	4.85569	0	0.978894	0.622291	0.116271	0.50602	0.356603
2021	J61827126O	PROFARMA SH.A.		1.35365	0.353991	0.202009	0.164497	0.121521	0.774959	0.115649	0.115649	0.0941738	0.398689	0.324655	0.20264	0.165011	0.4083	1	4.35106	0.778277	1.15876	0.0174736	0.0264831	0.429289	0.199092	0.146043	0.283245	0.570711	0.7522	0.348849	0.255897	1.98622	0.573301	0	0	1.97362	0.572496	1.00313	1.33359	0	-0.446861	0	2.15702	0.290073	0.548656	0.328213	0.328213	0	0.00750123
2022	J61827126O	PROFARMA SH.A.		1.36582	0.42054	0.174774	0.138982	0.101757	0.810779	0.103749	0.103749	0.0825026	0.31855	0.253314	0.176264	0.140167	0.441965	1	2.16361	0.593214	1.5952	0.0532955	0.0934016	0.411397	0.232991	0.176651	0.234746	0.588603	0.698938	0.395838	0.30012	1.8437	0.630819	0	0	1.82264	0.59362	1.00852	1.44294	0	-0.462275	0	2.12786	0.325693	0.513721	0.374826	0.374467	0.000359709	0.0219256
2020	M01321501F	Henri 2010		1.99089	0.995895	-0.00279407	-0.00279407	-0.00140343	17.5965	-0.0246955	-0.0246955	-0.0246955	0	0	-0.0250628	-0.0250628	-1.68528	0	1.93703	66.8237	1.41853	66.6216	66.6216	0.0146537	0	0	0.0146537	0.985346	0.0148716	0	0	0	0.00235182	0	0	0	8.83854	8.96999	603.162	0	-0.0119086	0	8.96999	0	1	0.0237481	0.0207867	0.00296144	0.976252
2021	M01321501F	Henri 2010		1.97279	0.99765	0.0227629	0.0227866	0.0115505	19.7048	0.227363	0.227363	0.2276	0	0	0.370871	0.371258	0.587576	-0.042445	2.18842	2.58431	0	0.848944	0.848944	0.38695	0	0	0.38695	0.61305	0.631189	0	0	0	0	0	0.0672288	0	9.98829	16.2928	25.8129	0	-0.00444878	0	16.2928	0	1	0.671501	0	0.671501	0.328499
2019	L78513201T	Delta Med		1.94495	0.9806	0.00825749	0.00700889	0.00360364	7.32395	0.0308233	0.0310946	0.0263928	2.63114	0	0.0898115	0.0769022	0.0469295	0	68.2422	1.07988	0.423772	0.0940271	0.0940271	0.6568	0	0	0.6568	0.3432	1.91375	0	0	0	0.0739144	0	0.17034	0	3.76562	10.9721	5.73329	0	-0.0467203	0	11.3833	0	0.987602	0.925845	0.278334	0.647511	0.061757
2020	L78513201T	Delta Med		1.94726	0.982516	0.0238212	0.0202475	0.0103979	7.46311	0.0909479	0.0912976	0.0776009	9.88689	0	0.271666	0.231798	0.136718	0	2.58431	1.04134	0.447325	0.0667613	0.0667613	0.665221	0	0	0.665221	0.334779	1.98705	0	0	0	0.0776416	0	0.169157	0	3.83262	11.4482	5.76141	0	-0.0288253	0	11.79	0	0.990294	0.945883	0.29757	0.648313	0.044411
2022	L22312016D	PEGASUS MED		1	0.554413	0.249922	0.213569	0.213569	1.65395	0.404216	0.413358	0.353233	1.53453	0	1.05335	0.920493	16.5028	0	1.50366	14.1301	9.07441	0.262036	6.59274	0.616257	0.591763	0.591763	0.0244938	0.383743	1.60591	1.54208	1.54208	0.445134	0.134386	1	0.00923034	0	1.65395	4.31005	2.68386	0.134386	-0.744551	42.6542	3.04105	0	0.568368	0.406887	0.222267	0.18462	0.161481
2023	L22312016D	PEGASUS MED		1	0.487918	0.255436	0.217047	0.217047	2.03026	0.509774	0.518601	0.440662	1.73647	0	1.05977	0.916097	13.7094	0	1.48867	9.07323	4.53914	0.210381	2.93628	0.518979	0.481795	0.481795	0.0371842	0.481021	1.07891	1.00161	1.00161	0.609323	0.0831343	1	0.0114254	0	2.03026	4.22073	3.91203	0.0831343	-0.740216	16.8257	4.32909	0	0.506165	0.396982	0.168784	0.228198	0.109183
2021	K91524002L	INTER TRADE & DISTRIBUTION		1.7023	0.931139	0.173441	0.147198	0.0864701	7.41244	0.742096	0.755226	0.640954	637.546	0	1.15608	0.998519	2.07234	0	23.2045	1.61843	1.17087	0.27898	0.27898	0.358095	0.181904	0	0.358095	0.641905	0.557863	0.283381	0	0	0.0962903	0.000404934	0.091093	0	4.35437	6.78352	12.1598	3.89912e-05	-0.124693	0.00163758	6.79584	0	0.998836	0.817051	0.419284	0.397767	0.0999013
2022	K91524002L	INTER TRADE & DISTRIBUTION		1.6982	0.931432	0.174134	0.147675	0.0869598	7.25068	0.733416	0.743488	0.630518	306.058	0	1.16163	0.998652	1.98957	0	13.6124	1.48963	1.21661	0.171482	0.171482	0.368631	0.134926	0	0.368631	0.631369	0.583859	0.213703	0	0	0.105039	0	0.0992975	0	4.26964	6.76251	11.5824	0	-0.13171	0	6.78827	0	0.997604	0.872458	0.448479	0.423979	0.0632134
2022	L61918018A	ABA COMERCIAL CLEANERS		1	0	0.623545	0.525554	0.525554	0.587639	0.366419	0.36642	0.308836	4.22534	0	0.502572	0.423592	1.35254	0.29468	2.7893	3.37113	0	0.33227	0.33227	0.270912	0	0	0.270912	0.729088	0.371577	0	0	0	0	0	0.567503	0	0.587639	0.805992	2.16911	0	-0.387219	0	0.914801	0	0.913281	0.822171	0	0.822171	0.0900159
2023	L61918018A	ABA COMERCIAL CLEANERS		1.00668	0	0.460697	0.387391	0.384819	0.409155	0.183163	0.187245	0.157451	1.59433	0	0.293533	0.252328	1.7082	1.62173	2.70624	8.25474	0	0.252887	0.886796	0.376006	0.268781	0.268781	0.107225	0.623994	0.60258	0.430743	0.430743	0.427425	0	0	0.648317	0	0.406439	0.651351	1.08094	0	-0.538834	0	0.522489	0	0.885116	0.783868	0	0.783868	0.095087
2020	K37411004L	COKA-H	Autovetura	1.7406	0.968836	0.0183365	0.015533	0.00892394	3.76404	0.0388891	0.0396525	0.0335901	1.11817	0	0.0798156	0.06894	0.250346	0	3.37113	0.594919	5.61862	0.0379313	0.125206	0.512763	0.357421	0.357421	0.155342	0.487237	1.05239	0.733568	0.733568	0.0973065	0.40361	0	0.0179699	0	2.16249	4.43828	4.21734	0	-0.240708	0	2.67014	0	0.965221	0.945771	0.872805	0.0729659	0.0194498
2021	K37411004L	COKA-H	Autovetura	1.79624	0.975077	0.0215968	0.0183572	0.0102198	4.22958	0.0508536	0.0508536	0.0432256	1.89852	0	0.0961199	0.0817019	0.324171	0	8.25474	0.176601	6.02723	0.00372923	0.0111952	0.470935	0.314062	0.314062	0.156873	0.529065	0.890129	0.593618	0.593618	0.0852885	0.401544	0	0	0	2.35469	4.45066	5.00002	0	-0.182167	0	2.88444	0	0.973214	0.971458	0.94551	0.0259478	0.00175623
2021	K43025620L	TERA MARBLE ( ish "TERA MARBIE")	Autovetura	1.82247	0.840545	0.0573908	0.0487822	0.0267671	3.18831	0.100402	0.100402	0.0853417	0.287593	0.774883	0.181558	0.154324	0.224614	0	6.21354	1.18647	0.269662	0.0549555	0.0549555	0.446997	0	0	0.446997	0.553003	0.80831	0	0	0	0.0689008	0	0.281975	15.8845	1.74945	3.16354	3.91377	0	-0.120143	0	8.58029	0.110135	0.650889	0.626324	0.120538	0.505785	0.024565
2022	K43025620L	TERA MARBLE ( ish "TERA MARBIE")	Autovetura	1.82847	0.82739	0.0330268	0.0280728	0.0153532	1.93675	0.0349827	0.0349827	0.0297353	0.174952	0.451755	0.112203	0.0953725	0.0508307	0	6.20383	0.872868	0.289617	0.0705469	0.0705469	0.688219	0	0	0.688219	0.311781	2.20738	0	0	0	0.188176	0	0.516825	16.0923	1.05922	3.39732	1.53907	0	-0.138502	0	9.47213	0.0658217	0.800044	0.751492	0.19932	0.552173	0.0485517
2021	K77606101B	MUCA - 2006Â	Autovetura	1.76523	0.928914	0.126179	0.107252	0.0607584	0.757564	0.0541511	0.0541511	0.0460284	0.326913	0	0.229309	0.194913	0.0708922	3.05234	1.45613	0.649637	0.442666	0.00675262	0.00675262	0.763851	0	0	0.763851	0.236149	3.23462	0	0	0	0.78789	0	0	0	0.42916	1.81733	0.561837	0	-0.108595	0	6.08693	0	0.834356	0.338131	0.338131	0	0.005158
2022	K77606101B	MUCA - 2006Â	Autovetura	1.43974	0.781809	0.0474264	0.0398649	0.027689	0.305725	0.0100709	0.0100709	0.00846522	0.0568264	0	0.0369891	0.0310917	0.0138387	24.6141	1.16248	0.572078	0.558525	0.0561147	0.0561147	0.727734	0	0	0.727734	0.272266	2.67287	0	0	0	1.91411	0	0	0	0.212348	0.779927	0.291794	0	-0.512837	0	2.2342	0	0.822778	0.406457	0.406457	0	0.0408366
2020	M11512003A	AUTO DONI	Autovetura	0	0	0	0	0	0	0	0	0	0	0	0	0	0	0	1.0923	0	0	0	0	0	0	0	0	0	0	0	0	0	0	0	0	0	0	0	0	0	0	0	0	0	0	0	0	0	0
2021	M11512003A	AUTO DONI	Autovetura	1.73901	0.854953	-0.0684189	-0.0684189	-0.0393436	1.92726	-0.0865802	-0.0758256	-0.0758256	-10.7743	0	-0.505005	-0.442275	-0.104495	0	1.1306	0.323776	0.873445	0.103677	0.103677	0.828556	0	0	0.828556	0.171444	4.8328	0	0	0	0.653007	0	0	0	1.10825	6.46422	1.33757	0	-0.319706	0	6.78211	0	0.991964	0.906062	0.723698	0.182364	0.085902
2021	L52317046G	MUHOPLUS LTD	Autovetura	1.83771	0.967891	0.058996	0.0477323	0.0259737	1.03942	0.0321968	0.0333684	0.0269976	2.27145	0	0.507129	0.425237	0.0601708	0	0	1.80693	0.035428	0.00873373	0.0152858	0.936512	0	0	0.535089	0.0634883	14.7509	0	0	0.0353108	0.0335166	0	0.419727	0	0.565604	8.9088	0.603948	0	-0.102469	0	1.25485	0	0.985825	0.977646	0.0189572	0.958689	0.00817924
2022	L52317046G	MUHOPLUS LTD	Autovetura	1.83913	0.929434	0.0738141	0.062742	0.0341151	0.388219	0.0155442	0.0155813	0.0132441	0.591487	0	0.308285	0.262668	0.0163696	0	1.19722	0.994907	0.030517	0.070686	0.070686	0.949579	0	0	0.949579	0.0504215	18.8328	0	0	0	0.13728	0	0.538632	0	0.211089	4.18648	0.222297	0	-0.0868832	0	8.74377	0	0.97372	0.906598	0.0289783	0.87762	0.0671219
2021	J68423505V	DAJANA	Autovetura	1.66595	0.616337	0.0252381	0.0252381	0.0151493	0.219845	0.00305925	0.00333052	0.00333052	0.101436	0	0.00307614	0.00334891	0.557117	7.84958	1.84236	176.616	0	5.05444	5.05444	0.00549123	0	0	0.00549123	0.994509	0.00552155	0	0	0	0	0	0.179112	0	0.131964	0.132693	24.0318	0	-0.306756	0	0.136843	0	0.969841	0.942085	0	0.942085	0.027755
2022	J68423505V	DAJANA	Autovetura	1.79755	0.909019	0.0387297	0.0387297	0.0215458	0.0764141	0.00133464	0.0016464	0.0016464	0.0519165	0	0.00133605	0.00164815	1.26095	17.952	1.02542	920.503	0	14.6012	14.6012	0.00105844	0	0	0.00105844	0.998942	0.00105956	0	0	0	0	0	0	0	0.0425101	0.0425552	40.1632	0	-0.156386	0	0.0436792	0	0.974293	0.958838	0	0.958838	0.0154544
2021	L11827007A	AUTO START GROUP (A.S.G)	Autovetura	1.88869	0.936132	0.0246115	0.020915	0.0110738	1.57447	0.0117151	0.0205169	0.0174354	0.0532339	0.123699	0.0686714	0.102202	0.0743899	0	176.616	1.99131	2.96117	0.0107364	0.0565445	0.829403	0.16243	0.133582	0.157483	0.170597	4.86177	0.952125	0.783025	0.327523	0.559401	0	0.357144	5.91437	0.833629	4.88654	1.0051	0	-0.0841568	0	1.33928	0.14095	0.779931	0.764558	0.466333	0.298225	0.00890479
2022	L11827007A	AUTO START GROUP (A.S.G)	Autovetura	1.79931	0.89036	0.0626978	0.0532108	0.0295729	1.35926	0.0414546	0.047364	0.0401972	0.18774	0.317787	0.208915	0.202578	0.197142	0	920.503	1.42063	2.2849	0.0017551	0.00669038	0.801572	0.115683	0.0892196	0.210278	0.198428	4.0396	0.582998	0.449631	0.373434	0.636011	0	0.38279	5.97223	0.755433	3.80708	0.94244	0	-0.144577	0	1.32785	0.126491	0.779191	0.770153	0.480463	0.28969	0.00140684
2021	K02023001W	ASG	Autovetura	1.34531	0.550499	0.0207011	0.00937355	0.00696755	0.44018	-0.0194683	0.00677329	0.00306697	-0.0247563	0	-0.351748	0.0554131	-0.0745148	0	4.95248	0.8099	0	0.00629038	0.0227438	0.944653	0.651862	0.456399	0.261268	0.0553475	17.0677	11.7776	8.24607	1.15074	0	0	0.127012	0	0.327195	5.91164	0.346365	0	-0.553782	0	-6.58775	0	0.211601	0.191749	0	0.191749	0.00594222
2022	K02023001W	ASG	Autovetura	1.37959	0.630901	0.0148034	0.00603916	0.0043775	0.535217	-0.0228331	0.00574301	0.00234291	-0.0276076	0	-0.405687	0.0416275	-0.0680941	0	3.70553	0.510016	0	0.00533261	0.0150081	0.943717	0.672868	0.420563	0.335318	0.0562827	16.7674	11.9551	7.47232	1.35941	0	0	0.138722	0	0.387953	6.89293	0.41109	0	-0.531946	0	-2.36124	0	0.171017	0.14999	0	0.14999	0.00503247
2021	L41407002L	ENERGY PLUS ALBANIA	Autovetura	1.03335	0	0.265054	0.225296	0.218026	1.55683	0.399329	0.399329	0.33943	2.44503	0	0.515802	0.438431	1.76844	0.297981	0.8099	3.66025	0.0141599	1.20729	1.20729	0.225808	0	0	0.225808	0.774192	0.29167	0	0	0	0.00212229	0	0.350094	0	1.5066	1.94602	6.67201	0	-0.701601	0	2.49476	0	0.829711	0.557095	0.00319743	0.553897	0.272616
2022	L41407002L	ENERGY PLUS ALBANIA	Autovetura	1.02776	0	0.552074	0.469263	0.456587	1.03702	0.557047	0.557047	0.47349	4.89595	0	0.860656	0.731558	1.57909	0	0.510016	2.5075	0.00472041	1.50676	1.50676	0.352764	0	0	0.352764	0.647236	0.545032	0	0	0	0.00165033	0	0.349876	0	1.00901	1.55895	2.86029	0	-0.420164	0	1.89145	0	0.886223	0.354693	0.00166519	0.353028	0.53153
2018	L91412032Q	Global Masters Group	Autovetura	0	0	0	0	0	0	0	0	0	0	0	0	0	0	0	3.67441	0	0	0	0	0	0	0	0	1	0	0	0	0	0	0	0	0	0	0	0	0	0	0	0	0	1	1	0	1	0
2019	L91412032Q	Global Masters Group	Autovetura	2.2344	0.803381	-0.999425	-0.999425	-0.447289	1.63815	-0.737586	-0.732728	-0.732728	-14.0899	0	1.04029	1.03344	-0.431585	0	2.51222	0.265048	0.289452	0.178005	0.178005	1.70902	0	0	1.70902	-0.709018	-2.4104	0	0	0	0.674732	0.0635782	0	0	0.733149	-1.03404	0.428989	0.0428983	-0.758395	1.98578	-0.962939	0	0.947651	0.643438	0.494679	0.148758	0.304214
2021	L82216030P	GERMAN HOSPITAL INTERNATIONAL	8610	1.41892	0.862034	0.0858044	0.0766958	0.0540523	2.40241	0.145278	0.145278	0.129856	0.795321	0	0.651926	0.58272	0.186935	1.04111	0	0.980479	0.0712199	0.391422	0.391422	0.777156	0	0	0.777156	0.222844	3.48745	0	0	0	0.0326904	0.24737	0.04161	0	1.69313	7.59781	2.17862	0.00808662	-0.495277	0.018773	42.1401	0	0.817335	0.513089	0.055349	0.45774	0.304196
2022	L82216030P	GERMAN HOSPITAL INTERNATIONAL	8610	1.36005	0.79029	0.00921062	0.0077275	0.0056818	1.20083	-0.0160083	0.00813239	0.00682289	-0.0935961	0	-0.106898	0.0455607	-0.0188279	20.9244	0.554501	0.731751	0.243218	0.197689	0.197689	0.850246	0	0	0.850246	0.149754	5.67763	0	0	0	0.234213	0.879717	0.046389	0	0.882936	5.89592	1.03845	0.206041	-0.603403	0.219139	-41.4859	0	0.828964	0.660849	0.206795	0.454054	0.168084
2021	K71822007C	International Hospital (Ish HYGEIA HOSPITAL - TIRANA)	8610	1.72619	-1.75041	-0.00115122	-0.00939588	-0.00544312	1.10012	-0.00664406	-0.000733682	-0.00598806	-0.00699989	-0.00634876	-0.0448841	-0.0404525	-0.0108076	131.019	1.0517	0.036299	0.0403589	0.00194361	0.00269357	0.851973	0.496829	0.160856	0.614761	0.148027	5.75553	3.35634	1.08667	4.00135	0.0389311	0	0	0.675696	0.637307	4.30534	0.748037	0	-0.265683	0	-1.12274	0.943186	0.0471263	0.0454704	0.0248111	0.0206593	0.0016559
2022	K71822007C	International Hospital (Ish HYGEIA HOSPITAL - TIRANA)	8610	1.7475	-2.10201	-0.00161675	0.00309454	0.00177084	1.03121	0.0196987	-0.000954056	0.00182611	0.0208178	0.00193609	0.129959	0.0120475	0.0358022	-431.185	0.974969	0.0458715	0.0467182	0.00208745	0.00321885	0.848424	0.46248	0.157619	0.550211	0.151576	5.59734	3.05114	1.03987	3.17305	0.0435596	0	0	0.625645	0.590108	3.89314	0.695534	0	-0.289117	0	-1.18195	0.943198	0.0509438	0.0477935	0.0257049	0.0220886	0.00177104
2020	M01531003B	VITAVIX	2120	1.66166	0.910169	0.247385	0.210277	0.126546	4.50442	0.669562	0.670609	0.570018	77.4851	0	1.17463	1	1.55719	0	0.0766579	1.38547	0.920113	0.187013	0.187013	0.429982	0	0	0.429982	0.570018	0.754331	0	0	0	0.145947	0	0	0	2.7108	4.75563	6.30444	0	-0.0905694	0	4.82883	0	0.991359	0.910947	0.395632	0.515314	0.0804121
2021	M01531003B	VITAVIX	2120	1.77292	0.933318	0.14379	0.122222	0.0689382	8.22315	0.664521	0.666929	0.566889	108.779	0	1.11715	0.953014	1.64019	0.0493025	0.0925897	1.19844	1.2547	1.04497	1.04497	0.40515	0	0	0.40515	0.594838	0.681109	0	0	0	0.109599	0	0	0	4.6382	7.79741	11.4481	0	-0.0827723	0	7.87816	0	0.993891	0.570523	0.508343	0.0621802	0.423368
2021	K76911001E	GEGA OIL	4730	1.99011	0.997303	0.00498326	0.00422655	0.00212377	12.6147	0.01976	0.0315874	0.0267909	0.100089	0.150385	0.080437	0.109058	0.0288042	0.132802	2.30558	0.693967	0.475953	0.0357281	0.039287	0.754342	0.283105	0.0683327	0.68601	0.245658	3.07071	1.15244	0.278162	2.88915	0.0515102	0	0.0667988	35.5811	6.33871	25.803	8.40296	0	-0.00303907	0	54.3784	0.178148	0.802577	0.775625	0.326508	0.449117	0.0269513
2022	K76911001E	GEGA OIL	4730	1.99054	0.985534	0.00394041	0.00334895	0.00168243	13.1828	0.00619046	0.0260962	0.0221791	0.0358862	0.151457	0.0269361	0.0965065	0.00840595	0	2.45314	0.53914	0.584508	0.0241985	0.0253073	0.77018	0.215738	0.0337422	0.736438	0.22982	3.35123	0.938728	0.14682	5.11238	0.0649967	0	0.0525164	45.2253	6.62271	28.8169	8.59891	0	-0.00251057	0	72.7295	0.146438	0.827497	0.80886	0.430454	0.378406	0.0186372
2021	K32528408H	B O L V - O I L SHA	4730	1.96241	0.839527	0.00704932	0.00458024	0.00233398	2.12628	0.00763794	0.00763794	0.00496269	0.0109135	0.0104741	0.00975591	0.00633882	0.0352808	110.212	1.16992	0.367496	0.269619	0.0402113	0.0403239	0.217096	0.121804	0.00060594	0.21649	0.782904	0.277296	0.15558	0.000773965	1155	0.0538717	0.0288571	0.314485	2.2868	1.0835	1.38395	4.99087	0.00155458	-0.0320092	0.0147473	-13.7918	0.473807	0.137929	0.1292	0.05837	0.0708296	0.00872973
2022	K32528408H	B O L V - O I L SHA	4730	1.98878	0.864302	-0.0127788	-0.0127788	-0.00642545	2.87871	-0.0305248	-0.018497	-0.018497	-0.0509616	-0.0609271	-0.04658	-0.028226	-0.0885648	0	1.12365	0.712958	0.146443	0.005655	0.00565535	0.344681	0.241297	2.11553e-05	0.34466	0.655319	0.525975	0.368213	3.22824e-05	28313.3	0.0348696	0.0215658	0.196658	4.76784	1.44748	2.20882	4.19947	0.000751992	-0.0156916	0.00812434	-29.8703	0.303593	0.296201	0.294252	0.050473	0.243779	0.00194917
2019	L81904039A	Spitali Okulistik International shpk	Spital	0	0	0	0	0	0	-0.00214424	-0.00214424	-0.00214424	-0.00263063	0	-0.111111	-0.111111	-0.00218644	0	0.637115	0.188531	0	0.0218644	0.0218644	0.980702	0	0	0.980702	0.0192982	50.8183	0	0	0	0	0	0	0	0	0	0	0	0	0	0	0	0.184893	0.16345	0	0.16345	0.0214424
2020	L81904039A	Spitali Okulistik International shpk	Spital	0	0	0	0	0	0	-0.00162876	-0.00162876	-0.00162876	-0.00198753	0	-0.111111	-0.111111	-0.00165299	0	0.859401	0.183196	0	0.0165299	0.0165299	0.985341	0	0	0.985341	0.0146588	67.2183	0	0	0	0	0	0	0	0	0	0	0	0	0	0	0	0.180511	0.164223	0	0.164223	0.0162876
2021	K41420001V	M E D I C A M E N T A	4646	1.83429	0.904692	0.067888	0.0576911	0.0314515	2.58429	0.096567	0.095646	0.0812797	3.2865	0	0.668387	0.562576	0.122972	0	0.188531	0.587103	0.648272	0.0244011	0.026584	0.855522	0	0	0.785274	0.144478	5.92148	0	0	0.418275	0.361331	0	0.277598	0	1.40888	9.75153	1.64681	0	-0.0984802	0	7.62239	0	0.970109	0.949233	0.509071	0.440161	0.0208757
2022	K41420001V	M E D I C A M E N T A	4646	1.8121	0.907197	0.0931102	0.0791307	0.0436679	2.7547	0.153578	0.141543	0.120292	3.36212	0	0.833088	0.652524	0.239034	0	0.183196	0.718332	0.766388	0.0206959	0.0262736	0.815652	0	0	0.642495	0.184348	4.42451	0	0	0.263802	0.323913	0	0.276561	0	1.52016	8.24615	1.86374	0	-0.102703	0	4.88123	0	0.953926	0.937045	0.492401	0.444644	0.0168807
2018	K91530017T	INCOMED	4646	1.72061	0.860961	0.0699634	0.0583529	0.033914	2.07423	0.0868517	0.084342	0.0703453	1.01596	0	0.1138	0.0921721	0.376056	0	1.23538	1.67009	1.69816	0.347877	0.356689	0.236804	0.0125034	0.00585025	0.230954	0.763196	0.31028	0.016383	0.00766547	14.6126	0.325335	0	0.241016	0	1.20552	1.57956	5.09077	0	-0.211506	0	2.20404	0	0.777911	0.695532	0.392197	0.303335	0.0823789
2019	K91530017T	INCOMED	4646	1.72844	0.87351	0.0562037	0.047072	0.0272338	2.16162	0.067048	0.0702896	0.0588692	0.773085	0	0.0914153	0.0802642	0.252414	0	1.48472	1.48218	1.48146	0.470869	0.472517	0.266557	0.00589279	0.000929606	0.265627	0.733443	0.363432	0.00803442	0.00126745	93.2952	0.314656	0	0.20683	0	1.25062	1.70514	4.69176	0	-0.212765	0	2.39769	0	0.787222	0.661709	0.393516	0.268193	0.125513
2018	J62903750A	PEGASUS	5110	1.68498	0.913442	0.192293	0.162565	0.0964784	1.32076	0.146939	0.150727	0.127424	3.79353	0	0.228595	0.198236	0.411356	0	3.36825	1.65344	0.554089	0.176154	0.176154	0.357207	0	0	0.357207	0.642793	0.555711	0	0	0	0.252507	0	0.313862	0	0.783839	1.21943	2.19436	0	-0.120775	0	1.81722	0	0.788546	0.562841	0.197925	0.364917	0.0629236
2019	J62903750A	PEGASUS		1.72863	0.937705	0.151372	0.128125	0.0741195	1.08834	0.090733	0.0953031	0.0806669	2.72224	0	0.406955	0.361806	0.116767	0	2.96363	0.86751	0.218489	0.106262	0.106262	0.777044	0	0	0.777044	0.222956	3.48519	0	0	0	0.269658	0	0.424415	0	0.629595	2.82385	0.810243	0	-0.116348	0	9.42152	0	0.843869	0.443911	0.169775	0.274136	0.0825705
2019	K12511603H	Kleidi Shpk	4673	1.85081	0.962132	0.027519	0.023275	0.0125756	3.5083	0.0468596	0.0521635	0.0441189	0.267648	0.412204	0.112132	0.105573	0.370437	8.28701	2.20753	5.56121	0.956823	0.231577	1.06564	0.582102	0.455604	0.455604	0.126498	0.417898	1.39293	1.09023	1.09023	0.38428	0.063853	0	0.0346074	17.7101	1.89555	4.53591	3.25638	0	-0.118871	0	2.7156	0.107032	0.82452	0.671224	0.121036	0.550187	0.134802
2020	K12511603H	Kleidi Shpk	4673	1.82374	0.953107	0.0379527	0.0322588	0.0176883	2.59776	0.0511703	0.0540602	0.0459498	0.238173	0.318825	0.135588	0.121755	0.173634	7.03421	1.086	2.34458	0.318585	0.192215	0.406085	0.622604	0.327903	0.327903	0.294701	0.377396	1.64974	0.868856	0.868856	0.65521	0.0659132	0	0.122149	9.88333	1.42441	3.77431	2.28783	0	-0.136277	0	2.90615	0.144122	0.784837	0.650495	0.0938875	0.556607	0.119674
2020	L29414501N	NARDI PETROL	4730	1.95517	0.996084	0.012232	0.0103972	0.00531783	16.9913	0.0909839	0.106302	0.0903568	5.32485	0	0.140754	0.139784	0.25731	5.60554	6.51804	2.68125	0.0985074	0.0640492	0.0640492	0.353597	0.279279	0	0.353597	0.646403	0.547022	0.432051	0	0	0.00400806	0	0.0876907	0	8.69047	13.4443	24.5773	0	-0.0308397	0	13.8094	0	0.982913	0.949147	0.0348319	0.914315	0.0226476
2021	L29414501N	NARDI PETROL	4730	1.95831	0.99631	0.00966079	0.00821167	0.00419324	13.5165	0.0367646	0.0666799	0.0566779	4.2951	0	0.0796504	0.122793	0.0682816	6.5463	2.66316	1.81797	0.023396	0.136975	0.136975	0.538426	0.498764	0	0.538426	0.461574	1.1665	1.08057	0	0	0.00182509	0	0.113019	0	6.90212	14.9534	12.8191	0	-0.0276919	0	15.236	0	0.99144	0.904505	0.012597	0.891908	0.0737509
2020	K01318005N	Blue Point Petroleum	4730	1.78159	0.793471	0.0241418	0.0203256	0.0114087	0.283866	0.00127596	0.00384659	0.00323853	0.00207766	0.00628794	0.00142821	0.00362495	0.0119697	-86.4395	2.77976	3.46494	0.154832	0.0066863	0.0066863	0.106599	0.0275273	0	0.106599	0.893401	0.119318	0.0308118	0	0	0.103587	0.132087	0.127755	0.309361	0.159333	0.178344	1.4947	0.0136826	-0.178138	0.030553	0.570543	0.515039	0.385865	0.376313	0.0165049	0.359808	0.000712753
2021	K01318005N	Blue Point Petroleum	4730	1.89012	0.890897	0.0116352	0.00988997	0.00523245	0.371296	0.00514687	0.00228563	0.00194278	0.00862526	0.0038822	0.00591587	0.00223306	0.0395941	-138.385	1.84137	2.9812	0.121171	0.067907	0.067907	0.129991	0.0244066	0	0.129991	0.870009	0.149413	0.0280533	0	0	0.0801829	0.134484	0.0992961	0.392539	0.19644	0.225791	1.51118	0.0107833	-0.112808	0.0206846	0.718799	0.500434	0.40328	0.385864	0.0157511	0.370113	0.00882728
2019	K78731511B	"A & M"	5610	1.8678	0.934692	0.0739273	0.0628382	0.033643	2.68828	0.105558	0.106402	0.0904416	0.273899	0.28493	0.22988	0.19696	0.349387	0	3.61978	0.0598804	0.135727	0.0334522	0.0598804	0.540812	0	0	0.302124	0.459188	1.17776	0	0	1.61463	0.0284911	0	0	4.53435	1.43928	3.13439	2.66133	0	-0.0576893	0	-5.9223	0.317416	0.0590978	0.0410065	0.0410065	0	0.0180913
2020	K78731511B	"A & M"	5610	1.84369	0.919525	0.0469713	0.0399256	0.0216553	1.38736	0.0345785	0.0353454	0.0300436	0.11006	0.127361	0.0548522	0.0476584	0.15782	2.2372	3.10237	1.13589	0.110028	0.00459349	0.00774882	0.369605	0	0	0.219101	0.630395	0.586307	0	0	2.08752	0.0320366	0	0	3.18995	0.752489	1.19368	2.03593	0	-0.108318	0	13.9657	0.235894	0.272982	0.271285	0.0241072	0.247177	0.00169778
2020	L91612011A	PARTNERS PHARMA	4646	1.59422	0.919195	0.171829	0.148663	0.0932516	1.90774	0.194258	0.205621	0.1779	1.56157	0	1.37517	1.25937	0.291729	-0.206769	0.195608	0.382124	0.932821	0.0105317	0.013582	0.858739	0.229271	0.0701799	0.665884	0.141261	6.0791	1.62303	0.49681	0.64504	0.519068	0	0.196058	0	1.19666	8.4713	1.39351	0	-0.224457	0	5.7061	0	0.875601	0.866557	0.621151	0.245406	0.00904401
2021	L91612011A	PARTNERS PHARMA	4646	1.69154	0.946477	0.128658	0.109359	0.0646507	3.03708	0.214784	0.230999	0.196349	0.79832	0	0.717711	0.656108	0.405666	0.5236	1.24592	0.764729	0.614843	0.0343182	0.0454198	0.700737	0.275042	0.171275	0.529462	0.299263	2.34154	0.919065	0.572324	1.57084	0.181312	0	0.2052	0	1.79545	5.99956	2.56223	0	-0.171998	0	8.93396	0	0.73043	0.706382	0.325536	0.380847	0.024048
2021	K84121001E	2A ^ 2E	6820	1.96466	0.998032	0.0166311	0.0141005	0.00717704	23.1301	0.188509	0.195799	0.166005	3.69949	80.1079	0.238829	0.210319	0.894693	2.20966	1.31494	4.17362	0.330701	1.78439	1.78439	0.210697	0	0	0.210697	0.789303	0.26694	0	0	0	0.00591839	0	0.0411683	5681.23	11.7731	14.9158	55.8768	0	-0.018088	0	15.9451	0.00207227	0.949045	0.57308	0.0696775	0.503402	0.375965
2022	K84121001E	2A ^ 2E	6820	1.96858	0.99841	0.0164681	0.0139979	0.00711062	37.7957	0.305509	0.316177	0.268751	3.15071	117.492	0.316384	0.278317	8.88854	1.53961	1.37957	23.2507	3.02231	3.27861	3.27861	0.0343711	0	0	0.0343711	0.965629	0.0355946	0	0	0	0.00541059	0	0.0352025	8393.59	19.1994	19.8828	558.591	0	-0.0143915	0	22.1022	0.00228739	0.903035	0.790345	0.10388	0.686465	0.11269
2021	K12720201S	Mc-Donald''s''	5610	1.8005	-2.24574	0.0234125	0.0188753	0.0104834	2.65084	0.00595747	0.0344697	0.0277897	0.00824922	0.0666479	0.0432999	0.20198	0.0137991	0	4.50432	0.217206	0.423942	0.00599707	0.0119797	0.862414	0.683128	0.430687	0.431727	0.137586	6.26817	4.96509	3.1303	1.67682	0.124316	0.27422	0.0573494	3.53095	1.47228	10.7008	1.70716	0.0340898	-0.159579	0.2857	-9.5031	0.416963	0.276801	0.271095	0.183027	0.0880672	0.00517196
2022	K12720201S	Mc-Donald''s''	5610	1.82519	-1.46121	0.0138625	0.011757	0.00644154	2.71332	-0.00678517	0.020608	0.0174779	-0.010038	0.0469709	-0.0264372	0.0680997	-0.0179184	0	26.2731	0.28624	0.567426	0.00783104	0.0153727	0.743348	0.596725	0.338538	0.37867	0.256652	2.89632	2.32503	1.31905	1.85354	0.144536	0.241888	0.0653027	3.99513	1.48659	5.79225	1.99986	0.0349616	-0.147057	0.483527	-26.8278	0.372102	0.323257	0.316553	0.214867	0.101686	0.00582118
2021	L81331010I	PROVIT PHARMACEUTICALS	FARMACI	1.02681	1.43743	-4.61113	-4.61113	-4.49074	0.212837	-0.979279	-0.955796	-0.955796	-3.47816	0	1.58289	1.54493	-0.825417	-0.342766	0.641148	0.476044	0.129524	0.00164046	0.00223815	1.61867	0.124949	0	1.18641	-0.618666	-2.61638	-0.201965	0	0.651344	0.741357	0	2.08943	0	0.20728	-0.335044	0.128056	0	-5.47104	0	-0.442948	0	0.718449	0.715794	0.153668	0.562126	0.00265535
2022	L81331010I	PROVIT PHARMACEUTICALS	FARMACI	1.63525	0.251534	-0.241904	-0.241904	-0.147931	0.746741	-0.0946106	-0.110466	-0.110466	-0.449901	0	0.226811	0.264821	-0.108814	2.81884	0.853666	0.599747	0.30306	0.0217146	0.0353921	1.41713	0	0	0.869473	-0.417134	-3.39731	0	0	0.383982	0.577033	0	0.749635	0	0.456651	-1.09473	0.322235	0	-0.64137	0	-5.40375	0	0.784967	0.754194	0.263503	0.490691	0.0307725
2021	L72203025F	MARJO - MONDI	TE TJERA	1.90463	0.911826	-0.0175158	-0.0175158	-0.00919639	7.78204	-0.0777264	-0.0715667	-0.0715667	0	0	-1.57401	-1.44927	-0.081764	0	0.605568	0.876291	0.175656	0.492459	0.492459	0.950619	0	0	0.950619	0.0493811	19.2506	0	0	0	0.0408683	0	0.0868167	0	4.08584	82.741	4.29809	0	-0.111373	0	82.741	0	1	0.531859	0.166982	0.364877	0.468141
2022	L72203025F	MARJO - MONDI	TE TJERA	1.79041	0.862026	0.0531786	0.0531786	0.0297019	7.43072	0.220707	0.220707	0.220707	0	0	0.809838	0.809838	0.303391	-0.340311	0.902807	1.37463	0	0.434957	0.434957	0.727467	0	0	0.727467	0.272532	2.66929	0	0	0	0	0	0.164707	0	4.1503	15.2286	5.70513	0	-0.156414	0	15.2286	0	1	0.683583	0	0.683583	0.316417
2021	M02214001I	PharmaLab Continental	FARMACI	1	0	-0.116806	-0.116806	-0.116806	0.0274663	-0.00320823	-0.00320823	-0.00320823	-0.215998	0	-0.00336788	-0.00336788	-0.0676826	0	1.05195	20.7832	0	0.00394228	0.00394228	0.0474012	0	0	0.0474012	0.952599	0.0497598	0	0	0	0	0	1.45725	0	0.0274663	0.028833	0.579443	0	-1.11681	0	0.0292897	0	0.985147	0.98496	0	0.98496	0.000186869
2022	M02214001I	PharmaLab Continental	FARMACI	1	0	0.0194822	0.0194822	0.0194822	0.285153	0.00555541	0.00555541	0.00555541	0.20507	0.891988	0.00630933	0.00630933	0.0464917	-0.530425	1.37463	8.13162	0	0.0556652	0.0556652	0.119493	0.0056974	0	0.119493	0.880507	0.135709	0.00647059	0	0	0	0	0.340529	45.7848	0.285153	0.323851	2.38637	0	-0.980901	0	0.334618	0.00622812	0.971667	0.965016	0	0.965016	0.00665158
2021	J91419001U	REJSI FARMA	FARMACI	1.86759	0.975182	0.0535671	0.0441871	0.02366	1.61363	0.0452502	0.0462829	0.0381785	0.100386	0.106951	0.062699	0.0529004	0.175667	7.21563	20.7832	1.12511	1.00711	0.362824	0.391986	0.278295	0.0207042	0.0207042	0.257591	0.721705	0.385608	0.0286879	0.0286879	21.7715	0.30025	0	0.19904	2.42041	0.864017	1.19719	3.10468	0	-0.0806607	0	2.96253	0.356971	0.549239	0.448267	0.259421	0.188846	0.100972
2022	J91419001U	REJSI FARMA	FARMACI	1.87732	0.975625	0.0581986	0.0485704	0.0258722	1.6508	0.0504027	0.0511763	0.0427098	0.124324	0.134577	0.0736197	0.0623831	0.173077	6.51058	8.13162	1.08037	0.961359	0.35173	0.380895	0.315363	0.0241471	0.0241471	0.291216	0.684637	0.460629	0.0352699	0.0352699	16.7894	0.318379	0	0.228236	2.77077	0.879338	1.28439	2.78833	0	-0.0708498	0	2.89859	0.317362	0.594584	0.483661	0.279963	0.203698	0.110923
2021	K42003004T	MURATI D	TE TJERA	1.84009	0.873717	0.0520597	0.0442507	0.0240481	1.19329	0.0317763	0.0337604	0.0286963	0.180269	0	0.0661903	0.0597747	0.061117	0.381212	2.13222	1.48527	0.0869054	0.740499	0.740499	0.519925	0	0	0.519925	0.480075	1.08301	0	0	0	0.0696758	0.5524	0.349024	0	0.648494	1.35082	1.24728	0.0384889	-0.116397	-3.38259	2.1799	0	0.817413	0.271524	0.0451843	0.22634	0.385004
2022	K42003004T	MURATI D	TE TJERA	1.69926	0.766458	0.0595512	0.0505517	0.0297493	1.14448	0.0374289	0.0401088	0.0340474	0.227424	0	0.078092	0.0710369	0.0718807	0	2.04173	1.30093	0.292215	0.191017	0.191017	0.520708	0	0	0.520708	0.479292	1.08641	0	0	0	0.225917	0.25661	0.636554	0	0.673517	1.40523	1.29346	0.0579724	-0.25802	0.857189	2.18067	0	0.829565	0.580889	0.152159	0.42873	0.0994643
2021	L51514004U	NIRUPA	TE TJERA	1.61544	1.76087	0.168342	0.168342	0.104208	2.55119	0.265855	0.265855	0.265855	0	0	0.33019	0.33019	1.36445	2.02856	1.57218	3.76538	1.36695	0.509459	0.509459	0.194844	0	0	0.194844	0.805156	0.241995	0	0	0	0.16865	0	0.196402	0	1.57925	1.96143	8.10524	0	-0.216216	0	1.96142	0	1	0.900735	0.266341	0.634394	0.0992647
2022	L51514004U	NIRUPA	TE TJERA	1.7133	1.80841	0.149876	0.149876	0.0874777	3.58905	0.313962	0.313962	0.313962	0	0	0.368852	0.368852	2.10978	1.71112	1.59315	5.0396	1.68027	1.11169	1.11169	0.148812	0	0	0.148812	0.851188	0.174829	0	0	0	0.119364	0	0.135959	0	2.09482	2.46105	14.0769	0	-0.136823	0	2.46105	0	1	0.834567	0.250046	0.584522	0.165433
2021	M02302028V	TIEN	FARMACI	1.76919	0.848694	0.0880484	0.0748396	0.0423017	3.04235	0.151411	0.151411	0.128696	8.47293	0	0.920754	0.782625	0.201592	0	5.13232	1.25184	0.0557924	0.0693013	0.0770967	0.835558	0	0	0.751073	0.164442	5.08117	0	0	0.211517	0.0243681	1	0.513087	0	1.71963	10.4574	2.05806	0.0243681	-0.142766	0.0693993	7.44246	0	0.98213	0.924225	0.0419042	0.882321	0.0579053
2022	M02302028V	TIEN	FARMACI	1.54077	0.714932	0.156906	0.13337	0.0865609	2.00485	0.204166	0.204166	0.173541	1.67848	2.04227	0.72947	0.62005	0.306794	0	6.71987	1.21446	0.105426	0.0418406	0.0452756	0.720117	0	0	0.665483	0.279883	2.57292	0	0	2.22639	0.0539186	0.749358	0.597966	15.3128	1.3012	4.64909	1.80693	0.0404043	-0.302327	0.0970181	6.11237	0.0849745	0.878362	0.848232	0.0701589	0.778073	0.0301302
2021	M12506803T	Përparim Agimi	TE TJERA	1.81723	0.931308	0.112898	0.112898	0.0621263	5.7041	0.354374	0.354374	0.354374	0	0	1	1	0.548885	0	1.30764	1.478	0.0708802	0.248282	0.248282	0.645626	0	0	0.645626	0.354374	1.82188	0	0	0	0.0145791	0	0.180453	0	3.13889	8.85755	4.86177	0	-0.0698674	0	8.85755	0	1	0.839702	0.0457621	0.79394	0.160298
2022	M12506803T	Përparim Agimi	TE TJERA	1.85209	0.931381	0.107938	0.0903281	0.048771	7.66515	0.446717	0.446717	0.373837	0	0	0.707352	0.591949	1.21238	0.689334	1.31989	2.66018	0.0537823	0.288435	0.288435	0.368465	0	0	0.368465	0.631535	0.583443	0	0	0	0.00478824	0	0.117351	0	4.13866	6.55333	11.2322	0	-0.0399759	0	6.55333	0	1	0.893722	0.0198169	0.873905	0.106278
2021	M07305004A	MAXIPHARMA	FARMACI	1.51878	0.570239	0.00194854	0.00194854	0.00128297	1.3719	0.0017601	0.0017601	0.0017601	0.0513824	0	0.0152552	0.0152552	0.00198966	-8.69576	1.54888	0.413043	0.678659	0.0489645	0.0489645	0.884623	0	0	0.884623	0.115377	7.66725	0	0	0	0.664636	0	0.289051	0	0.903288	7.82902	1.0211	0	-0.47927	0	11.1349	0	0.965745	0.92243	0.600358	0.322072	0.0433151
2022	M07305004A	MAXIPHARMA	FARMACI	1.3344	0.61454	0.461089	0.461089	0.345539	1.65648	0.57238	0.57238	0.57238	38.461	0	0.895344	0.895344	1.58679	-0.015506	2.71396	0.345445	2.38556	0.0400899	0.0400899	0.360716	0	0	0.360716	0.639284	0.564249	0	0	0	0.693197	0	0.0523856	0	1.24137	1.94181	3.4414	0	-0.204531	0	1.98809	0	0.985118	0.970657	0.86051	0.110146	0.0144611
2021	M02311029F	MEDIMPACT	FARMACI	0	0	0	0	0	0	-223.154	-223.211	-223.211	0	0	0.882251	0.882477	-0.878777	0.133354	1.0917	0.00393799	0	0.00277088	0.00277088	253.937	239.82	0	253.937	-252.937	-1.00395	-0.948141	0	0	0	0	0	0	0	0	0	0	0	0	0	0	1	0.296371	0	0.296371	0.703629
2022	M02311029F	MEDIMPACT	FARMACI	0	0	0	0	0	0	0	0	0	0	0	0	0	0	0	2.73101	0.00133096	0	0	0	751.339	750.458	0	751.339	-750.339	-1.00133	-1.00016	0	0	0	0	0	0	0	0	0	0	0	0	0	0	1	1	0	1	0
2021	M11529014H	PL-97 GROUP	TE TJERA	1.96151	1	0.0281843	0.0281843	0.0143687	6.45669	0.0927741	0.0927741	0.0927741	0	0	0.478916	0.478916	0.115064	0	0.00393799	1.19479	0.0454684	0.00539642	0.00539642	0.806283	0	0	0.806283	0.193717	4.16217	0	0	0	0.0111372	0	0	0	3.2917	16.9923	4.08256	0	-0.0103062	0	16.9923	0	1	0.0439925	0.0366604	0.00733208	0.00435104
2022	M11529014H	PL-97 GROUP	TE TJERA	1.95237	1	0.025329	0.025329	0.0129734	14.8291	0.192384	0.192384	0.192384	0	0	0.294627	0.294627	0.55438	1.14658	0.00133096	1.98761	0.894023	0.195219	0.195219	0.347026	0	0	0.347026	0.652974	0.531454	0	0	0	0.040847	0	0	0	7.5954	11.632	21.8871	0	-0.0222964	0	11.632	0	1	0.326286	0.310249	0.0160372	0.0677461
2021	M21305052J	INDIAN EYE INSTITUTE AND LAZER CENTER	FARMACI	0	0	0	0	0	0	0	0	0	0	0	0	0	0	0	1.24026	0	0	0	0	0	0	0	0	0	0	0	0	0	0	0	0	0	0	0	0	0	0	0	0	0	0	0	0	0	0
2022	M21305052J	INDIAN EYE INSTITUTE AND LAZER CENTER	FARMACI	1.30568	0.689322	0.322407	0.290521	0.222506	1.41669	0.329656	0.349819	0.315221	0.585883	0	1.04078	0.995204	2.14218	0	2.88163	1.40362	0.941947	0.210436	0.934332	0.68326	0.529372	0.529372	0.153888	0.31674	2.15716	1.67131	1.67131	1.06289	0.133596	0	0.00255005	0	1.08502	3.42559	1.58801	0	-0.353332	0	5.23996	0	0.360955	0.210721	0.144955	0.0657659	0.143783
2021	M21307517P	CRF	FARMACI	0	0	0	0	0	0	0	0	0	0	0	0	0	0	0	0	0	0	0	0	0	0	0	0	0	0	0	0	0	0	0	0	0	0	0	0	0	0	0	0	0	0	0	0	0	0
2022	M21307517P	CRF	FARMACI	1.91008	0.970241	0.0477579	0.0477579	0.025003	8.65096	0.2163	0.2163	0.2163	2.48069	0	0.858711	0.858711	0.289129	0	2.34556	1.22015	0	0.821945	0.821945	0.74811	0	0	0.74811	0.25189	2.96999	0	0	0	0	0	0.0657748	0	4.5291	17.9805	6.05406	0	-0.0421596	0	27.4998	0	0.912806	0.297901	0	0.297901	0.614906
2021	M01417001E	DITË E NATË	FARMACI	1.8427	0.527702	-0.0586603	-0.0586603	-0.0318338	4.08258	-0.142488	-0.129964	-0.129964	-0.991091	0	2.18685	1.99463	-0.199836	0	0	0.278877	0.921963	0.032499	0.0485488	1.06516	0.464767	0.35213	0.713027	-0.0651569	-16.3476	-7.13304	-5.40434	0.408284	0.296716	0	0.00762517	0	2.21554	-34.0031	2.08001	0	-0.210305	0	15.4712	0	0.856231	0.710865	0.657384	0.0534805	0.0346166
2022	M01417001E	DITË E NATË	FARMACI	1.86013	0.594552	-0.0669807	-0.0669807	-0.0360086	5.21636	-0.198973	-0.187834	-0.187834	-1.82131	0	0.820424	0.774491	-0.212836	0	1.22015	0.179481	0.698629	0.0316975	0.042129	1.24253	0.402204	0.307659	0.934866	-0.242525	-5.12329	-1.6584	-1.26857	0.355092	0.232901	0	0.0073323	0	2.8043	-11.5629	2.25693	0	-0.202877	0	-24.6096	0	0.820915	0.716862	0.653124	0.0637377	0.0393849
2021	K72417006F	SUPPORT - 07 SH.P.K	TE TJERA	2.0195	0.963351	-0.105296	-0.105296	-0.0521398	6.16795	-0.321595	-0.321595	-0.321595	-3.74484	0	-1.35076	-1.35076	-0.422088	-1.62659	1.20084	0.162091	1.03768	0.00279676	0.00279676	0.761915	0.0266735	0	0.761915	0.238085	3.20018	0.112034	0	0	0.258865	0	0	0	3.05419	12.8282	4.00857	0	-0.0857926	0	20.0659	0	0.914123	0.911992	0.790624	0.121368	0.0021309
2022	K72417006F	SUPPORT - 07 SH.P.K	TE TJERA	0	0	0	0	0	0	0	0	0	0	0	0	0	0	0	0.87811	0.0963406	1.18875	0.00203315	0.00203315	0.717913	0.00616235	0	0.717913	0.282087	2.54501	0.0218456	0	0	0	0	0	0	0	0	0	0	0	0	0	0	0.922584	0.921124	0.85342	0.0677046	0.00145963
2021	M11707049K	BENNETT	FARMACI	1.89658	0.946182	0.0437193	0.0437193	0.0230516	3.55821	0.0820226	0.0820226	0.0820226	4.04365	0	1	1	0.0893514	0	1.19977	0.778707	0.288548	0.208183	0.208183	0.917977	0	0	0.917977	0.0820226	11.1918	0	0	0	0.141185	0	0.266319	0	1.87612	22.8732	2.04375	0	-0.0596974	0	30.3883	0	0.979716	0.788609	0.26488	0.523728	0.191107
2022	M11707049K	BENNETT	FARMACI	1.84634	0.891717	0.0383255	0.0383255	0.0207576	2.95822	0.0597102	0.0614055	0.0614055	7.04515	0	0.551835	0.567503	0.0669549	0.76541	1.28509	0.705513	0.406315	0.122207	0.122207	0.891797	0	0	0.891797	0.108203	8.24189	0	0	0	0.226156	0	0.321434	0	1.60221	14.8075	1.79661	0	-0.114279	0	16.0659	0	0.991525	0.882541	0.36235	0.520191	0.108984
2021	M14117401D	Primo Lab	FARMACI	0	0	0	0	0	0	0	0	0	0	0	0	0	0	0	1.06725	0	0	0	0	0	0	0	0	0	0	0	0	0	0	0	0	0	0	0	0	0	0	0	0	0	0	0	0	0	0
2022	M14117401D	Primo Lab	FARMACI	1.60365	0.815701	0.194965	0.16572	0.103339	4.51461	0.546341	0.548865	0.466535	1.36687	0	0.838336	0.715878	1.56858	0	1.11183	1.6634	0.0600911	0.0675534	0.0675534	0.348303	0	0	0.348303	0.651697	0.534456	0	0	0	0.0074346	1	0	0	2.8152	4.31981	8.08262	0.0074346	-0.200485	0.0818665	11.1717	0	0.600298	0.576769	0.0209299	0.555839	0.0235291
2021	M14119402V	FARMACI ENEA	FARMACI	0	0	0	0	0	0	0	0	0	0	0	0	0	0	0	0	0	0	0	0	0	0	0	0	0	0	0	0	0	0	0	0	0	0	0	0	0	0	0	0	0	0	0	0	0	0
2022	M14119402V	FARMACI ENEA	FARMACI	2.24678	0.998677	-0.275503	-0.275503	-0.122621	26.5026	-3.24977	-3.24977	-3.24977	0	0	-3.32103	-3.32103	-151.459	0	1.72349	2.52349	44.0825	2.52349	2.52349	0.0214565	0	0	0.0214565	0.978544	0.0219269	0	0	0	0.0801859	0	0	0	11.7958	12.0544	549.754	0	-0.0287185	0	12.0544	0	1	0.945855	0.945855	0	0.0541452
2021	K01515004T	EDNA - FARMA	FARMACI	1.85243	0.970798	0.0666514	0.0768043	0.0414613	0.731656	0.0257827	0.0263253	0.0303354	1.915	0	0.0791426	0.0931174	0.0382406	7.8961	0	1.27094	0.192273	0.939633	0.939633	0.674224	0	0	0.674224	0.325776	2.0696	0	0	0	0.328215	1	0.555091	0	0.39497	1.2124	0.585814	0.328215	-0.0887653	0.192774	1.26466	0	0.986536	0.353013	0.129635	0.223378	0.633523
2022	K01515004T	EDNA - FARMA	FARMACI	1.84277	0.966944	0.0541619	0.0459884	0.0249561	0.641933	0.0182299	0.0188674	0.0160202	1.68035	0	0.0542714	0.047693	0.0274506	16.0491	46.606	1.09965	0.389814	0.737904	0.737904	0.664098	0	0	0.664098	0.335902	1.97706	0	0	0	0.743139	1	0.68105	0	0.348353	1.03707	0.52455	0.743139	-0.106159	0.390286	1.07168	0	0.989151	0.499111	0.258875	0.240236	0.49004
2021	M11727015L	ILUMINA PHARMA	FARMACI	1.78448	-1.08708	-2.10256	-2.10256	-1.17825	0.933562	-1.09997	-1.09997	-1.09997	-6.12049	0	1.0128	1.0128	-0.527294	0	1.46322	0.0311479	0.362071	0.0279569	0.0279569	2.08607	0	0	2.08607	-1.08607	-1.92076	0	0	0	1.44374	0	0.012724	0	0.523158	-0.4817	0.250787	0	-2.31808	0	-0.413307	0	0.820281	0.761961	0.755304	0.00665666	0.0583199
2022	M11727015L	ILUMINA PHARMA	FARMACI	1.77762	0.410716	-0.531646	-0.531646	-0.299077	2.74774	-0.821787	-0.821787	-0.821787	-8.73959	0	0.750555	0.750555	-0.392279	0.335975	1.48947	0.0811671	0.351296	0.0365501	0.0365501	2.09491	0	0	2.09491	-1.09491	-1.91332	0	0	0	0.476103	0	0.00839969	0	1.54574	-1.41176	0.737857	0	-0.754026	0	-1.3001	0	0.90597	0.829401	0.735932	0.0934685	0.0765689
2021	M12006020P	Petplanet	FARMACI	0	0	0	0	0	0	0	0	0	0	0	1.00689	1.00689	-4.17535	0	0.393219	0	0	0	0	0	0	0	0	0	-1	0	0	0	0	0	0	0	0	0	0	0	0	0	0	0	0	0	0	0	0
2022	M12006020P	Petplanet	FARMACI	0	0	0	0	0	0	0	0	0	0	0	0.477301	0.477301	-15.9148	1.10266	0.432463	0	0	0	0	0	0	0	0	0	-1	0	0	0	0	0	0	0	0	0	0	0	0	0	0	0	0	0	0	0	0
2021	L92204011T	XH - N - SH GROUP	TE TJERA	1.88982	0.956538	0.0427925	0.0362112	0.0191612	8.79739	0.199205	0.199205	0.168569	0	0	0.460891	0.390009	0.350848	1.41571	0	1.33869	0.42255	0.758305	0.758305	0.567782	0	0	0.567782	0.432218	1.31365	0	0	0	0.0515379	0	0.0639137	0	4.65515	10.7704	8.19883	0	-0.0673885	0	10.7704	0	1	0.569448	0.239917	0.329531	0.430552
2022	L92204011T	XH - N - SH GROUP	TE TJERA	1.9087	0.971502	0.0417995	0.0352929	0.0184905	7.50206	0.164291	0.164291	0.138717	0	0	0.44812	0.378364	0.259389	0	0	1.07663	0.502212	0.411994	0.411994	0.633377	0	0	0.633377	0.366623	1.7276	0	0	0	0.0809295	0	0.106614	0	3.93045	10.7207	6.20555	0	-0.0494985	0	10.7207	0	1	0.739052	0.318089	0.420963	0.260948
2021	K31503045V	ALDOSCH - FARMA	FARMACI	1.88497	0.899404	0.0630988	0.0521859	0.0276853	1.99997	0.0334304	0.0669485	0.0553698	5.06523	0	0.047835	0.0792278	0.234854	9.81976	1.76124	3.72033	3.2143	0.0330682	0.0699559	0.301132	0.158787	0.158787	0.142345	0.698868	0.430885	0.227206	0.227206	0.041565	0.431231	0	0.301084	0	1.06101	1.51818	3.52341	0	-0.0424436	0	1.25598	0	0.987112	0.977154	0.45754	0.519613	0.00995789
2022	K31503045V	ALDOSCH - FARMA	FARMACI	1.90198	0.912937	0.0544809	0.0453702	0.0238541	2.25761	0.054649	0.0646676	0.0538534	9.47309	0	0.0727797	0.0717201	0.470773	10.7531	1.57884	4.67687	3.83862	0.0505037	0.108382	0.249117	0.133034	0.133034	0.116083	0.750883	0.331766	0.17717	0.17717	0.0433639	0.375407	0	0.412839	0	1.18698	1.58078	4.76473	0	-0.0350949	0	1.36055	0	0.988508	0.975926	0.4456	0.530326	0.0125813
2021	M11822012L	ROYAL PHARMA	FARMACI	0	0	0	0	0	0	0	0	0	0	0	0	0	0	0	6.93463	1.20412	0.814731	1.03794	1.03794	0.495332	0	0	0.495332	0.504668	0.981499	0	0	0	0	0	0	0	0	0	0	0	0	0	0	0	1	0.485877	0.403562	0.0823154	0.514123
2022	M11822012L	ROYAL PHARMA	FARMACI	0	0	0	0	0	0	0	0	0	0	0	0	0	0	0	8.51549	0.431902	0.440087	0.123373	0.128003	1.1055	0.0431406	0.0399905	1.06551	-0.1055	-10.4786	-0.408915	-0.379056	1.77259	0	0	0	0	0	0	0	0	0	0	0	0	0.929113	0.792725	0.468917	0.323807	0.136389
2021	K62220004U	GEN ALB FARMA SHPK	FARMACI	1	0	0.280075	0.238027	0.238027	0.8365	0.234282	0.234282	0.19911	9.92606	71.4903	0.44104	0.374827	0.553368	1.13583	2.01885	1.6598	0.64642	0.40462	0.448028	0.468796	0.0454201	0.0454201	0.423376	0.531204	0.882515	0.0855041	0.0855041	0.519654	0.327171	0	0.613311	300.345	0.8365	1.57472	1.78436	0	-0.719925	0	1.5126	0.00278513	0.976397	0.786713	0.273678	0.513035	0.189684
2022	K62220004U	GEN ALB FARMA SHPK	FARMACI	1.61208	0.928922	0.288374	0.245118	0.15205	1.47853	0.261782	0.264483	0.224811	5.21094	106.662	0.45126	0.387529	0.701613	1.16788	0.87199	1.72637	0.819124	0.175172	0.197131	0.419886	0.0467717	0.0467717	0.373115	0.580114	0.7238	0.080625	0.080625	1.07409	0.333234	0	0.622124	435.148	0.917154	1.58099	2.18429	0	-0.102121	0	1.59049	0.00210768	0.949763	0.876211	0.305627	0.570583	0.0735524
2021	L41723017J	Leo-FM Company	Farmaci	1.21721	5.07876	0.042756	0.0322361	0.0264837	2.13662	0.0729919	0.0750518	0.0565857	0.559192	0	-0.503373	-0.390231	0.0672066	-3.84359	2.30622	0.800555	0	0.0392085	0.0413357	1.14501	0.0589228	0.0589228	1.08608	-0.145006	-7.89628	-0.406348	-0.406348	2.21529	0	0	0.19739	0	1.75535	-12.1054	1.53305	0	-0.752083	0	-8.10359	0	0.869469	0.823833	0	0.823833	0.0448939
2022	L41723017J	Leo-FM Company	Farmaci	1.0715	1.61699	0.0457745	0.032246	0.0300942	1.47831	0.0520754	0.0631533	0.0444886	0.222161	0	-0.184684	-0.157777	0.0440801	-8.14271	2.5455	0.648051	0	0.0632385	0.068623	1.28197	0.100589	0.100589	1.18138	-0.281971	-4.54647	-0.356737	-0.356737	2.33031	0	0	0.438627	0	1.37966	-4.89292	1.0762	0	-0.877352	0	-3.3182	0	0.765596	0.667914	0	0.667914	0.08107
2021	L93723404L	MP Group	Farmaci	1.7346	0.589213	-0.679813	-0.679813	-0.391912	0.369084	-0.129811	-0.144649	-0.144649	-6.48019	0	0.331477	0.369367	-0.900981	1.74857	0.800555	2.67311	4.12858	0.0438277	0.423324	1.39161	1.24754	1.24754	0.144077	-0.391613	-3.55354	-3.18564	-3.18564	0.0160572	2.79557	0	0.777256	0	0.212777	-0.543336	0.1529	0	-1.01494	0	0.254552	0	0.979968	0.918977	0.594834	0.324143	0.0609912
2022	L93723404L	MP Group	Farmaci	1.58837	0.905112	0.225295	0.225295	0.14184	1.20129	0.170392	0.170392	0.170392	15.7718	0	-8.17429	-8.17429	1.16674	-1.04756	0.648051	4.67845	2.09495	0.00515979	0.0360675	1.02084	0.874803	0.874803	0.146041	-0.0208448	-48.9735	-41.9674	-41.9674	0.0123498	0.404531	0	0.856601	0	0.756307	-36.2827	0.740864	0	-0.186339	0	0.896997	0	0.989196	0.983929	0.305949	0.67798	0.00526735
2021	L41702003D	R&S FARMA	Farmaci	1.93395	0.977608	0.0229574	0.0190556	0.00985317	4.46191	0.052966	0.052966	0.043964	20.1875	0	0.41216	0.34211	0.0607763	1.6055	6.80169	0.466566	0.677882	0.154124	0.154124	0.871492	0	0	0.871492	0.128508	6.78159	0	0	0	0.25606	0	0.117228	0	2.30714	17.9533	2.64735	0	-0.0430898	0	18.3274	0	0.997376	0.863058	0.590768	0.27229	0.134318
2022	L41702003D	R&S FARMA	Farmaci	1.94545	0.97361	0.0113148	0.00952063	0.0048938	3.69037	0.0208251	0.0214633	0.0180599	0.845732	0	0.204603	0.177435	0.023571	4.07829	6.7734	0.706165	0.397819	0.113875	0.115771	0.898217	0.0147111	0.0147111	0.883506	0.101783	8.82481	0.144534	0.144534	1.67382	0.185287	0	0.272788	0	1.89693	18.6369	2.11188	0	-0.0435716	0	20.6478	0	0.975376	0.873092	0.351476	0.521616	0.102284
2021	L51419031Q	Denis Roboçi	Farmaci	3.53814	0.905075	-1.53814	-1.53814	-0.434732	2.11211	-0.918202	-0.918202	-0.918202	0	0	1	1	-0.478678	0	1.14445	0.521322	0	0	0	1.9182	0	0	1.9182	-0.918202	-2.08908	0	0	0	0	0	1.2	0	0.596955	-0.650135	0.311205	0	0	0	-0.650135	0	1	1	0	1	0
2022	L51419031Q	Denis Roboçi	Farmaci	3.38746	-0.0337853	-3.57313	-3.57313	-1.05481	1.01833	-1.07415	-1.07415	-1.07415	0	0	0.478978	0.478978	-0.331263	1.08778	1.10398	0.308396	0	0.00215768	0.00215768	3.24258	0	0	3.24258	-2.24258	-1.44591	0	0	0	0	0	0.737236	0	0.300619	-0.13405	0.0927096	0	-2.18567	0	-0.13405	0	1	0.993004	0	0.993004	0.00699646
2021	L21507022D	Savas Unal	Farmaci	1.641	0.847994	0.0566271	0.0474521	0.0289166	0.947741	0.0189753	0.0327045	0.0274055	0.0399421	0.0612665	0.0911617	0.131662	0.052732	6.5952	0.521322	0.320816	1.13795	0.00991932	0.0218278	0.79185	0.483212	0.432005	0.359845	0.20815	3.80422	2.32146	2.07545	1.09969	0.709015	0	0.184191	1.29112	0.57754	2.77463	0.729356	0	-0.297023	0	3.49847	0.447316	0.524929	0.517074	0.409485	0.10759	0.00785461
2022	L21507022D	Savas Unal	Farmaci	1.57732	0.664367	0.0380238	0.0380238	0.0241066	0.411478	0.00991934	0.00991934	0.00991934	0.0212562	0.0223033	0.0457377	0.0457377	0.0219815	20.8638	0.308396	0.162349	1.01956	0.0127939	0.022203	0.783125	0.337409	0.331867	0.451258	0.216875	3.61096	1.55578	1.53023	1.40615	1.76364	0	0.242426	0.58656	0.260872	1.20287	0.333116	0	-0.424961	0	3.17804	0.444748	0.533344	0.523325	0.460083	0.063242	0.0100193
2021	L87201401H	Anadea	Farmaci	1.93899	0.969543	0.0236328	0.0236328	0.0121882	2.17675	0.0226627	0.0265307	0.0265307	1.76633	0	0.314633	0.368333	0.0244218	1.71494	1.45876	0.371641	0.692152	0.302256	0.302256	0.927971	0	0	0.927971	0.0720291	12.8833	0	0	0	0.57214	0.0571807	0.0573547	0	1.12262	15.5857	1.20976	0.0327154	-0.0339326	0.120692	18.9636	0	0.98717	0.706685	0.642297	0.0643876	0.280485
2022	L87201401H	Anadea	Farmaci	1.88133	0.964161	0.0773585	0.0773585	0.041119	3.20939	0.125321	0.131967	0.131967	0	0	0.517766	0.545223	0.165341	0.834111	1.1819	0.377735	0.9416	0.0544251	0.0544251	0.757958	0	0	0.757958	0.242042	3.13151	0	0	0	0.418364	0	0.132352	0	1.70591	7.04801	2.25067	0	-0.0374138	0	7.04801	0	1	0.958748	0.713693	0.245055	0.0412519
2021	K71407001F	eFarma.al	Farmaci	1.30913	0.820783	0.23477	0.178929	0.136677	1.09585	0.184838	0.196522	0.149778	1.45708	0	0.219792	0.178102	1.20459	0	1.06379	5.39449	0.295786	4.20031	4.35325	0.159032	0.00558714	0.00558714	0.153445	0.840968	0.189106	0.00664371	0.00664371	22.7048	0.0542203	0	0.190716	0	0.837084	0.995382	5.26361	0	-0.442141	0	1.1631	0	0.873145	0.205161	0.0453869	0.159774	0.667984
2022	K71407001F	eFarma.al	Farmaci	1.29687	0.804416	0.349356	0.295939	0.228195	0.840587	0.21412	0.226441	0.191818	1.42972	0	0.229582	0.205669	3.41975	0	1.31933	12.7061	0.873154	7.18431	7.72751	0.0673469	0.00473406	0.00473406	0.0626128	0.932653	0.07221	0.0050759	0.0050759	31.6355	0.0843468	0	0.355488	0	0.648165	0.694969	9.62428	0	-0.334764	0	0.822938	0	0.850236	0.366395	0.0546706	0.311724	0.483841
2021	J71519004W	MEDI - TEL	Farmaci	1.20134	-0.0269522	0.334187	0.284059	0.236452	0.392221	0.105148	0.109107	0.0927413	0.269238	0.315137	0.118499	0.104517	6.55127	0	5.69028	14.3431	2.12687	0.548348	3.84925	0.112667	0	0	0.01605	0.887333	0.126972	0	0	4.04216	0.104557	0	0.496294	1.10941	0.326486	0.36794	2.8978	0	-0.452344	0	1.31492	0.294288	0.264343	0.202562	0.0341363	0.168426	0.0617806
2022	J71519004W	MEDI - TEL	Farmaci	1.14396	-0.242973	0.426529	0.36255	0.316924	0.360416	0.13125	0.134382	0.114225	0.384758	0.433743	0.146793	0.127752	7.90229	0.399632	13.5793	16.6071	2.67401	0.998468	6.3655	0.105887	0	0	0.0166091	0.894113	0.118427	0	0	3.8209	0.140967	0	0.547435	1.19637	0.315059	0.352371	2.97542	0	-0.419566	0	1.03763	0.263346	0.320241	0.214516	0.0444129	0.170103	0.105725
2021	K12222001B	Neptune	Tregeti	0	0	0	0	0	0	0	0	0	0	0	0	0	0	0	16.4699	0.305441	0.761044	0.110688	0.129546	0.830806	0.267557	0.120942	0.709864	0.169194	4.91038	1.58136	0.714814	1.93174	0	0	0	0	0	0	0	0	0	0	0	0	0.757059	0.66226	0.540238	0.122022	0.09196
2022	K12222001B	Neptune	Tregeti	0	0	0	0	0	0	0	0	0	0	0	0	0	0	0	19.2811	0.301382	0.796537	0.0539719	0.0711715	0.804774	0.397723	0.194485	0.610288	0.195226	4.12226	2.03724	0.996203	1.65866	0	0	0	0	0	0	0	0	0	0	0	0	0.670047	0.624576	0.486117	0.138459	0.0434352
2021	J78423806C	Neri	Tregeti	1.88107	0.970783	0.0529383	0.0449929	0.0239187	4.57512	0.123772	0.128756	0.109431	0.235937	0.222399	0.125761	0.11119	7.82568	0	1.06649	24.7734	5.28487	10.9013	10.9013	0.0158161	0	0	0.0158161	0.984184	0.0160703	0	0	0	0.0343666	0	0.054857	4.94298	2.43219	2.47127	153.779	0	-0.064016	0	5.2921	0.492048	0.475405	0.295616	0.083586	0.21203	0.172416
2022	J78423806C	Neri	Tregeti	1.92022	0.977934	0.0223102	0.0189631	0.00987549	4.88874	0.0564723	0.0568001	0.0482787	0.108774	0.0993917	0.0595085	0.0508744	1.10683	0	1.09792	8.19405	1.22994	0.67167	0.67167	0.0510218	0	0	0.0510218	0.948978	0.053765	0	0	0	0.0246487	0	0.045452	5.24132	2.54593	2.68281	49.8988	0	-0.0573428	0	5.92342	0.485742	0.480829	0.446559	0.0627538	0.383806	0.0342698
2021	L51622005C	NOA CONTROL		1	0	0.20205	0.156577	0.156577	0.275175	0.0687075	0.0555992	0.0430862	0.802501	0	0.0905943	0.0568114	0.284395	16.5912	30.0583	1.64968	0	0.206726	0.206726	0.241591	0	0	0.241591	0.758409	0.31855	0	0	0	0	0	0.424431	0	0.275175	0.362833	1.13901	0	-0.845586	0	1.7532	0	0.398548	0.348604	0	0.348604	0.0499432
2022	L51622005C	NOA CONTROL		1	0	0.200818	0.164076	0.164076	0.268303	0.0594053	0.0538801	0.0440222	0.802328	0	0.0772972	0.057281	0.258025	16.4477	9.42399	1.8815	0	0.273138	0.274606	0.231469	0	0	0.230231	0.768531	0.301183	0	0	59.8178	0	0	0.43307	0	0.268303	0.349112	1.15913	0	-0.819775	0	1.32202	0	0.43318	0.369957	0	0.369957	0.0632228
2022	L11331010B	NOSTA OIL	Tregeti	1.99152	0.998744	0.00217531	0.00151074	0.000758585	50.1951	0.00429811	0.0548273	0.0380772	0.429251	0	-0.0544254	-0.482159	0.330085	-3.25116	1.64968	45.3311	30.6977	0.0758102	6.28184	1.07897	0	0	0.0130212	-0.0789725	-13.6626	0	0	0.00939353	0.0158592	0	0.0173825	0	25.2044	-319.154	23.3596	0	-0.00343851	0	25.7986	0	0.989987	0.90819	0.399721	0.508469	0.0817972
2023	L11331010B	NOSTA OIL	Tregeti	1.98963	0.997639	0.00309174	0.0023589	0.0011856	42.6321	0.0397663	0.0662473	0.0505445	2.00504	0	-0.506531	-0.643819	1.13652	-2.74502	1.8815	25.8207	2.19237	0.117549	3.62328	1.07851	0	0	0.0349897	-0.0785073	-13.7377	0	0	0.0190061	0.00358004	0	0.0357209	0	21.4272	-272.932	19.8674	0	-0.00412112	0	22.67	0	0.980167	0.853389	0.0767102	0.776679	0.126778
2022	K12512845W	DAIU SHPK	Tregeti	1.72457	0	0.14881	0.126489	0.0733448	0.981539	0.0832099	0.0846951	0.0719908	0.717642	0.643947	0.260771	0.225611	8.28023	0	76.0288	48.3736	39.5984	0.0532536	3.60832	0.680907	0	0	0.0100492	0.319093	2.13389	0	0	0.172837	0.699173	0	0.790402	5.09095	0.569149	1.78365	0.835868	0	-0.149932	0	0.651199	0.111796	0.884051	0.84779	0.397934	0.449856	0.0362608
2023	K12512845W	DAIU SHPK	Tregeti	1.63256	0	0.101101	0.0859354	0.0526383	0.446733	0.026407	0.027665	0.0235153	0.264063	0.242994	0.0846117	0.0753461	0.529839	0	28.013	7.69668	10.3612	0.00545712	0.0753209	0.687903	0	0	0.0498397	0.312097	2.20413	0	0	0.156729	1.88715	0	1.38813	2.82763	0.273639	0.876776	0.397787	0	-0.261738	0	0.321869	0.0967731	0.899997	0.896243	0.516397	0.379846	0.00375397
2022	L31605014G	GFI ALBANIA	Shoqeria Konçesionare	1.17291	-0.209836	0.397402	0.331495	0.282625	1.49054	0.500123	0.50502	0.421265	4.57301	5.17678	0.958917	0.807718	1.0453	0.167963	87.972	1.26635	0.583118	1.04046	1.04046	0.47845	0.0112022	0	0.47845	0.52155	0.917363	0.0214787	0	0	0.219541	1	0.0546633	15.6165	1.2708	2.43659	2.65608	0.219541	-0.42583	0.680875	3.12676	0.0813758	0.884878	0.387072	0.278993	0.108079	0.497806
2023	L31605014G	GFI ALBANIA	Shoqeria Konçesionare	1.17379	-0.0174283	0.485979	0.412958	0.351816	1.02284	0.413615	0.423482	0.359852	7.14441	7.08899	0.603647	0.525183	1.31387	0.852912	18.0578	2.38085	0.60749	1.08704	1.08704	0.314807	0.00433909	0	0.314807	0.685193	0.459442	0.00633264	0	0	0.219465	1	0.0039903	17.1664	0.871401	1.27176	2.76805	0.219465	-0.328909	0.673861	1.39214	0.0507621	0.940748	0.598542	0.191242	0.4073	0.342206
2022	L14529602C	Hotel Perla	Hoteleri	1.36112	0.377541	0.0630473	0.0630473	0.0463201	0.319941	0.0114979	0.0148197	0.0148197	0.0153863	0.0254788	-0.22544	-0.29057	0.0950494	-4.57071	1.84947	1.87259	0.216513	0.153267	1.33163	1.051	0.930034	0.930034	0.120968	-0.0510021	-20.607	-18.2352	-18.2352	0.803504	0.111425	0.516438	0.0945501	0.404121	0.235056	-4.60876	0.22365	0.0575439	-0.561698	0.114779	1.78416	0.581648	0.252714	0.0511845	0.0261911	0.0249934	0.161084
2023	L14529602C	Hotel Perla	Hoteleri	1.40794	0.514124	0.0262915	0.0262915	0.0186737	0.315491	0.00589138	0.00589138	0.00589138	0.00822426	0.0110565	-0.144287	-0.144287	0.0503575	-8.22837	2.98834	2.22752	0.197091	0.11352	1.00995	1.04083	0.92384	0.92384	0.116991	-0.0408311	-25.4912	-22.6259	-22.6259	0.775396	0.1029	0.512128	0.102449	0.420538	0.22408	-5.48797	0.215289	0.0526982	-0.565769	0.105138	1.34447	0.532841	0.283658	0.057988	0.0230579	0.0349301	0.118155
2022	K22924201W	HYSA	Shitje karburanti	1.98454	0.980376	0.006585	0.00625558	0.00315215	0.879345	0.00291779	0.00291779	0.00277183	0.0100941	0.0103271	0.00826864	0.007855	0.00450885	123.586	2.0891	0.183496	0.915115	0.0262736	0.0262736	0.647126	0	0	0.647126	0.352874	1.83387	0	0	0	1.33649	0	0.229617	1.65087	0.443097	1.25568	0.684715	0	-0.00887035	0	6.94358	0.268402	0.710939	0.693937	0.592194	0.101743	0.0170023
2023	K22924201W	HYSA	Shitje karburanti	1.94801	0.957191	0.0358565	0.0358565	0.0184068	2.61927	0.0482123	0.0482123	0.0482123	0.0622139	0.0670023	0.0475251	0.0475251	-3.33419	19.622	2.42461	-15.5639	0	-0.0819837	-0.0819837	-0.01446	0	0	-0.01446	1.01446	-0.0142539	0	0	0	0	0	0	1.86862	1.34459	1.32542	-92.9868	0	-0.0161354	0	5.61381	0.719562	0.225055	0.223869	0	0.223869	0.00118548
2022	K59723510W	"KOCI" SHPK	Ndertim	1	0	-66.8245	-66.8245	-66.8245	0.011954	-0.798822	-0.798823	-0.798823	-6.61045	0	0.336775	0.336776	-0.429871	1.9755	1.09861	0.454837	0.0182653	0.00244807	0.00444218	3.37197	0.740504	0	1.85828	-2.37197	-1.42159	-0.312189	0	0.0798329	2.83938	0	46.6201	0	0.011954	-0.00503971	0.00354512	0	-67.8245	0	-0.0122089	0	0.879158	0.704228	0.033942	0.670286	0.00825483
2023	K59723510W	"KOCI" SHPK	Ndertim	1	0	-13.7125	-13.7125	-13.7125	0.0695432	-0.953214	-0.953609	-0.953609	-10.2065	0	0.554361	0.55459	-0.639699	0.808775	-15.5639	0.583524	0.0248972	0.00339302	0.00619238	2.71948	0.770696	0	1.4901	-1.71948	-1.58157	-0.448213	0	0.0759671	0.533472	0	8.65051	0	0.0695432	-0.0404442	0.0255722	0	-14.7181	0	-0.119184	0	0.906607	0.715201	0.0370993	0.678102	0.00922727
2022	K82111001T	"NATURAL FARMING" (NAFA)	Agrobiznes	1.63179	0.82318	0.0248888	0.0211555	0.0129646	0.561813	-0.00637407	0.00856904	0.00728368	-0.0232582	0	-0.0190736	0.0217955	-0.0154954	-40.8638	0.473102	0.571978	0.991938	0.00217583	0.00352182	0.665817	0.340991	0.254466	0.411351	0.334183	1.99238	1.02037	0.761457	1.07699	1.18514	0.219808	0.0177826	0	0.344293	1.03025	0.517098	0.260503	-0.29994	0.290086	1.48423	0	0.643319	0.422403	0.408035	0.014368	0.00144871
2023	K82111001T	"NATURAL FARMING" (NAFA)	Agrobiznes	1.59792	0.644415	-0.145179	-0.145179	-0.090855	0.441853	-0.0449614	-0.0401446	-0.0401446	-0.178798	-4.53876	-0.157999	-0.141072	-0.0930796	7.02778	0.608421	0.495006	0.889693	0.00179628	0.00266046	0.715432	0.232389	0.232389	0.483043	0.284568	2.51409	0.816637	0.816637	1.08208	1.55418	0.201164	0.138378	31.2633	0.276518	0.971711	0.386505	0.312645	-0.529842	0.186378	1.48805	0.00884482	0.668869	0.468706	0.42976	0.0389468	0.00128512
2022	K21720007H	B&A-02'	Tregeti	1.69959	0.956961	0.217632	0.184525	0.10857	1.23689	0.158014	0.158383	0.134289	8.39511	0	0.206587	0.17557	0.672045	0.861011	1.56392	3.50522	0.667812	1.21235	1.21235	0.235124	0	0	0.235124	0.764876	0.307401	0	0	0	0.215757	0	0.472449	0	0.727756	0.951469	3.09521	0	-0.082268	0	0.975474	0	0.981178	0.696127	0.157018	0.539108	0.285051
2023	K21720007H	B&A-02'	Tregeti	1.86116	0.980146	0.0828169	0.0694648	0.0373234	2.6153	0.115217	0.116374	0.0976118	5.21773	0	0.138497	0.117334	0.685456	1.37935	1.3847	4.91622	0.901663	2.02593	2.02593	0.168088	0	0	0.168088	0.831912	0.202051	0	0	0	0.107856	0	0.275275	0	1.4052	1.68912	8.35988	0	-0.0552002	0	1.73518	0	0.977918	0.637383	0.151559	0.485823	0.340536
2022	L22319013O	2-MJ	Tregeti	1.82271	0.914139	0.0613962	0.0505108	0.0277119	0.489155	0.0148778	0.0164767	0.0135554	13.4891	21.2674	0.0515949	0.0470089	0.711797	7.14632	4.17303	40.9668	6.82332	0.020548	0.699598	0.711642	0	0	0.0209017	0.288358	2.46791	0	0	0.00159676	0.531435	0	2.9611	421.046	0.268366	0.930669	0.377109	0	-0.109933	0	0.274404	0.00063738	0.998897	0.984274	0.142619	0.841655	0.0146228
2023	L22319013O	2-MJ	Tregeti	1.90375	0.883543	-0.0319728	-0.0319728	-0.0167946	0.337624	-0.00714993	-0.00567027	-0.00567027	-6.31844	-8.67099	-0.0246398	-0.0195407	-0.206704	-19.9805	5.81788	25.5126	3.36464	0.0228107	0.468097	0.709822	0	0	0.0345901	0.290178	2.44616	0	0	0.00167586	0.656248	0	4.62405	271.199	0.177347	0.611166	0.249847	0	-0.119881	0	0.183917	0.000653935	0.998868	0.982677	0.116383	0.866293	0.0161915
2022	K01731001M	2 T	Ndertim	1.76831	1	0.0771155	0.0686774	0.0388378	0.850907	0.0166663	0.0371077	0.0330474	0.0895353	0	0.0378154	0.0749837	0.0363406	0	47.7901	1.74808	0.00425439	0.0473624	0.0577578	0.559273	0.320205	0.0997891	0.458614	0.440727	1.26898	0.726538	0.226419	1.84924	0.00405472	0	0.919156	0	0.481197	1.09182	0.860398	0	-0.133618	0	1.39465	0	0.803645	0.52287	0.00195112	0.520919	0.0264885
2023	K01731001M	2 T	Ndertim	1.76381	1	0.0553223	0.0483306	0.0274012	0.936249	-0.00709674	0.0293656	0.0256544	-0.0374052	0	-0.0162918	0.0588941	-0.0146633	0	28.8773	1.62146	0.00439881	0.0946684	0.110398	0.564398	0.326683	0.0727324	0.483981	0.435602	1.29568	0.749958	0.16697	2.35926	0.00401073	0	0.867825	0	0.53081	1.21857	0.940488	0	-0.117118	0	1.75241	0	0.786884	0.488324	0.00212894	0.486195	0.0534307
2022	K41316002G	2KT ALIGJONI	Tregeti	1.86519	0.648574	0.0295018	0.0295018	0.015817	0.713339	0.0112829	0.0112829	0.0112829	0.0121927	0.0138376	0.052144	0.052144	0.103069	0	1.75233	0.272759	0.408885	0.0381034	0.272759	0.78362	0.781687	0.674152	0.109469	0.21638	3.62151	3.61257	3.1156	1.37266	0.117036	0	0	0.469043	0.382448	1.76749	0.488052	0	-0.0760765	0	-10.9741	0.815378	0.0746187	0.0447601	0.0447601	0	0.0298586
2023	K41316002G	2KT ALIGJONI	Tregeti	1.78079	0.856781	0.0837247	0.0837247	0.0470156	0.705399	0.0331647	0.0331647	0.0331647	0.0348247	0.039507	0.135132	0.135132	0.404701	0	1.62586	0.268682	0.312986	0.0291795	0.268682	0.754575	0.752427	0.672627	0.0819486	0.245425	3.07457	3.06581	2.74066	1.41584	0.0647506	0	0	0.471868	0.396116	1.614	0.524953	0	-0.0978715	0	-11.5547	0.839464	0.0476669	0.0256488	0.0256488	0	0.0220181
2022	K81316005L	3A & K	Tregeti	1.59282	0.835155	0.114799	0.0975794	0.061262	0.68039	0.0475084	0.0490377	0.041682	0.298876	0.45327	0.0496348	0.0435477	1.10893	8.04527	0.681644	8.17509	11.4563	4.28414	4.28414	0.0428416	0	0	0.0428416	0.957158	0.0447592	0	0	0	1.149	0	0.361123	4.64514	0.42716	0.44628	9.97068	0	-0.288799	0	0.535153	0.0919585	0.841043	0.657503	0.490809	0.166695	0.18354
2023	K81316005L	3A & K	Tregeti	1.68453	0.850631	0.118797	0.100978	0.0599441	0.676922	0.0469214	0.0477382	0.0405775	0.312961	0.474845	0.0504512	0.04363	0.670645	8.6343	0.581668	5.4119	6.73815	0.986776	0.986776	0.0699645	0	0	0.0699645	0.930035	0.0752278	0	0	0	1.17317	0	0.286733	4.70247	0.401846	0.432075	5.74356	0	-0.194638	0	0.515115	0.0854542	0.850073	0.781034	0.471432	0.309602	0.0690393
2022	K78731511B	A & M	Tregeti	1.9062	0.962196	0.0148002	0.0125705	0.00659453	2.63081	0.0181001	0.0204263	0.017349	0.0553431	0.0814959	0.0252329	0.0241858	0.0719707	12.6143	19.6314	0.928277	0.266126	0.0305339	0.0343202	0.282679	0.0311862	0.0311862	0.251493	0.717321	0.394076	0.043476	0.043476	10.4871	0.0484943	0	0	6.48313	1.38014	1.92402	4.88235	0	-0.077319	0	28.229	0.212881	0.300383	0.291752	0.0669287	0.224824	0.00863128
2023	K78731511B	A & M	Tregeti	1.91232	0.951872	0.0218758	0.0185816	0.00971674	2.88275	0.029659	0.0329769	0.028011	0.0901975	0.132216	0.0409305	0.0386561	0.121382	7.77528	12.1501	0.963496	0.265929	0.0525859	0.0592653	0.275381	0.0310363	0.0310363	0.244345	0.724619	0.380036	0.0428312	0.0428312	10.5948	0.0431045	0	0	7.11542	1.50746	2.08035	5.47409	0	-0.0635996	0	26.8907	0.211858	0.300404	0.285922	0.0649783	0.220944	0.0144812
2022	K72113010E	A & E ENGINEERING sh.p.k	Projektim	1.50518	0.771724	0.319319	0.271389	0.180303	1.09358	0.214728	0.231998	0.197175	4.48844	0	0.650512	0.597335	0.320532	0.671224	1.1944	1.26705	0.154272	0.238209	0.238209	0.66991	0	0	0.66991	0.33009	2.02947	0	0	0	0.142247	0	0.948652	0	0.726539	2.20103	1.08453	0	-0.151727	0	2.5741	0	0.95216	0.792582	0.103348	0.689233	0.159578
2023	K72113010E	A & E ENGINEERING sh.p.k	Projektim	1.37658	0.670164	0.44207	0.37446	0.272021	1.0996	0.335757	0.353119	0.299114	4.06619	0	0.53152	0.473512	0.911619	1.09911	1.22943	2.21097	0.279952	0.489867	0.489867	0.368308	0.0290997	0	0.368308	0.631692	0.583051	0.0460664	0	0	0.129082	0	0.793574	0	0.798786	1.26452	2.1688	0	-0.159609	0	1.45467	0	0.917427	0.737005	0.103109	0.633897	0.180422
2022	J61828126T	A. B. A.	Projektim	1.62475	0.89322	0.163414	0.138384	0.0851724	0.789606	0.0797081	0.0794165	0.0672526	0.482419	0.56384	0.106427	0.0897965	0.32685	3.5462	1.42133	0.936653	2.48641	0.178534	0.183797	0.251056	0.0071883	0.0071883	0.243868	0.748944	0.335213	0.00959791	0.00959791	22.9854	1.24768	0	0.376472	4.07446	0.485985	0.648893	1.93576	0	-0.212432	0	0.822439	0.119276	0.834774	0.789952	0.606355	0.183597	0.044822
2023	J61828126T	A. B. A.	Projektim	1.65873	0.860616	0.0937001	0.0796149	0.0479976	0.612623	0.0328969	0.0346065	0.0294044	0.179467	0.261082	0.0443363	0.0396294	0.157446	9.89305	2.49092	1.14389	2.76486	0.207163	0.25582	0.258015	0.00762612	0.0053624	0.20894	0.741985	0.347735	0.010278	0.0072271	3.73524	1.56415	0	0.487966	3.27931	0.369333	0.497763	1.43144	0	-0.242943	0	0.6077	0.112625	0.816696	0.763245	0.577691	0.185554	0.0534511
2022	L81405032D	ADMC International	Ndertim	1.7738	0.946088	0.0467344	0.0175606	0.00989999	0.152366	-0.00502924	0.00401439	0.00150842	-0.0275854	0.0133753	-0.00868884	0.00260604	-0.0204522	58.8955	3.42306	2.91288	0.410345	0.308914	0.529113	0.421183	0.108205	0.102625	0.245902	0.578817	0.727663	0.186942	0.177301	1.04013	1.1747	0.0553177	0.139479	0.761666	0.085898	0.148403	0.203944	0.0649817	-0.46289	0.0249854	0.15036	0.112776	0.817186	0.246716	0.100904	0.145812	0.13011
2023	L81405032D	ADMC International	Ndertim	1.75138	0.866325	0.0274375	0.0210622	0.012026	0.928915	0.0218512	0.0145526	0.0111711	0.123814	0.0842283	0.0837683	0.0428255	0.0432572	3.48871	3.90875	0.482832	1.147	0.00104557	0.00152992	0.739147	0	0	0.505146	0.260853	2.83358	0	0	0.7542	1.09241	0.00921355	0.0110959	3.99903	0.530389	2.03329	0.717569	0.0100649	-0.23494	0.0203791	1.66708	0.132629	0.823301	0.585533	0.5794	0.00613303	0.000772831
2022	L31304034G	ADR TRADING	Transport	0	0	0	0	0	0	0	0	0	0	0	0	0	0	0	3.32322	2.54506	0.0250091	1.45456	1.45456	0.337607	0	0	0.337607	0.662393	0.509677	0	0	0	0	0	0	0	0	0	0	0	0	0	0	0.132328	0.867672	0.376399	0.00844322	0.367956	0.491069
2023	L31304034G	ADR TRADING	Transport	0	0	0	0	0	0	0	0	0	0	0	0	0	0	0	1.62983	24.3071	0.0986014	14.8756	14.8756	0.036142	0	0	0.036142	0.963858	0.0374972	0	0	0	0	0	0	0	0	0	0	0	0	0	0	0.117931	0.882069	0.344434	0.00356365	0.340871	0.537635
2022	K41615012R	AERMEK ALBANIA	Tregeti	1.72371	0.899434	0.189962	0.16119	0.0935135	0.825395	0.0924086	0.0909627	0.0771856	11.6629	0	0.166816	0.139335	0.207173	0.728614	2.57007	1.27186	0.952303	0.225246	0.225246	0.446045	0	0	0.446045	0.553955	0.8052	0	0	0	0.887067	0	0.948628	0	0.478847	0.864415	1.07354	0	-0.0893451	0	0.876958	0	0.992077	0.891607	0.42477	0.466837	0.10047
2023	K41615012R	AERMEK ALBANIA	Tregeti	1.63922	0.835461	0.243836	0.207254	0.126434	0.491509	0.0766375	0.0731123	0.0621435	11.0661	0	0.129171	0.104742	0.188438	2.05867	24.4057	1.41615	1.02564	0.474509	0.474509	0.406699	0	0	0.406699	0.593301	0.685486	0	0	0	1.39115	0	1.2383	0	0.299843	0.505381	0.737259	0	-0.128697	0	0.51135	0	0.993075	0.800092	0.417127	0.382965	0.192982
2022	J61824006C	A.F.C.	Tregeti	1.39519	-2.16432	0.307555	0.261301	0.187287	0.301737	0.0654043	0.0665149	0.0565114	0.207934	0.188891	0.0712995	0.0616051	24.3062	8.02615	2.22416	27.2101	6.04449	0.771434	23.704	0.0826822	0.0799914	0.0799914	0.00269084	0.917318	0.0901348	0.0872014	0.0872014	3.93222	0.075206	0.0512026	0.00120142	0.722887	0.21627	0.235763	2.61567	0.00385075	-0.29212	0	2.49182	0.299175	0.0894829	0.025699	0.0162648	0.00943418	0.0637839
2023	J61824006C	A.F.C.	Tregeti	1.3791	-19.5558	0.205873	0.174918	0.126834	0.215904	0.0301381	0.0322303	0.0273841	0.103416	0.0983389	0.0323854	0.029426	7.09124	18.3524	2.44179	11.9138	4.43583	0.597145	9.74963	0.0693909	0.0646232	0.0646232	0.00425006	0.930609	0.0745651	0.0694418	0.0694418	4.47378	0.120422	0.0494475	0.00467701	0.562201	0.156554	0.168228	2.25612	0.00595455	-0.401661	0	2.39979	0.278467	0.0694869	0.0280504	0.0188525	0.00919787	0.0414364
2022	L81819025K	Agjencia Ekonomike Mbështetëse	Hoteleri	1	0	0.0725867	0.024338	0.024338	1.81606	0.133631	0.131822	0.0441992	0.516978	1.59477	1.20859	0.399745	0.150244	1.46987	33.2546	0.804718	0.0289765	0.74169	0.74169	0.889432	0	0	0.889432	0.110568	8.04419	0	0	0	0.0141915	0.986929	0.00012355	65.5258	1.81606	16.4248	2.04182	0.014006	-0.92841	2.84263	-12.2775	0.0277151	0.741514	0.0818315	0.0257726	0.0560589	0.659683
2023	L81819025K	Agjencia Ekonomike Mbështetëse	Hoteleri	1	132.784	0.106636	0.0666068	0.0666068	1.43919	0.156102	0.153469	0.0958595	0.924366	6.13004	0.966401	0.593452	0.186174	0	16.3496	0.912853	0.0584714	0.828175	0.828175	0.838471	0	0	0.838471	0.161529	5.19085	0	0	0	0.0340655	0.814519	0.00141476	92.0333	1.43919	8.90978	1.71644	0.027747	-0.895193	1.67041	-59.8569	0.0156377	0.814428	0.120027	0.0490266	0.0709999	0.694401
2022	K41426033T	A H F	Tregeti	1.79975	0.885369	-0.0204538	-0.0204538	-0.0113648	1.76441	-0.0200522	-0.0200522	-0.0200522	-0.0540213	-0.098254	-0.0882607	-0.0882607	-0.0721612	0	0.833694	0.240567	2.01321	0.00546793	0.0152068	0.772808	0.000977634	0.000977634	0.27788	0.227192	3.40156	0.00430311	0.00430311	0.749988	0.570637	0	0.0638777	4.8037	0.980362	4.31512	1.26857	0	-0.220701	0	2.8139	0.204085	0.62628	0.622054	0.559431	0.0626232	0.00422566
2023	K41426033T	A H F	Tregeti	1.79028	0.887055	0.00981789	0.00981789	0.00548399	1.92717	0.0105686	0.0105686	0.0105686	0.0299407	0.0524336	0.0447626	0.0447626	0.0386346	0	0.971324	0.512555	1.84419	0.0122532	0.0342173	0.763897	0	0	0.273552	0.236103	3.23544	0	0	0.719868	0.468647	0	0.121556	5.34062	1.07646	4.55929	1.40917	0	-0.1999	0	2.90042	0.201561	0.644691	0.635331	0.504481	0.13085	0.00936021
2022	L61716024F	INFINITY INVESTMENT	NDERTIM	1.32575	-0.530874	-0.0458035	-0.0458035	-0.0345492	0.784388	-0.219871	-0.0270999	-0.0270999	-0.40479	0	-0.598111	-0.0737193	-0.683986	4.44913	2.25378	0.648953	0.0745673	0.0586532	0.115386	0.63239	0.333155	0.310934	0.321456	0.36761	1.72027	0.906273	0.845825	1.74691	0.0405136	0	0.165668	0	0.591656	1.60947	0.935587	0	-0.394236	0	-6.65709	0	0.23258	0.121989	0.0239701	0.0980186	0.0370917
2023	L61716024F	INFINITY INVESTMENT	NDERTIM	1.41165	-0.726375	-0.0151917	-0.0151917	-0.0107617	0.398125	-0.0725572	-0.00428449	-0.00428449	-0.154321	0	-0.228463	-0.0134907	-0.318535	25.64	2.35674	1.51035	0.0917528	0.00900576	0.02698	0.682411	0.476514	0.454627	0.227784	0.317589	2.14873	1.50041	1.4315	1.03419	0.0741057	0	0.443801	0	0.282028	0.888028	0.413281	0	-0.361462	0	2.05635	0	0.364934	0.146064	0.0208999	0.125164	0.00614563
2022	L61807036J	KEVUÇI	NDERTIM	1.94897	0.951587	-0.00724096	-0.00724096	-0.00371527	8.03493	-0.0343066	-0.029852	-0.029852	-0.0869304	-0.151212	-0.0475935	-0.0414136	-0.122886	-9.22022	0.723521	1.75809	0.410289	0.314413	0.314413	0.279175	0.158871	0	0.279175	0.720825	0.387299	0.220402	0	0	0.0277837	0.130338	0.0934956	20.8829	4.12265	5.71935	14.7673	0.00362128	-0.0571891	0.132622	12.6392	0.197418	0.605356	0.51758	0.114542	0.403037	0.0877762
2023	L61807036J	KEVUÇI	NDERTIM	1.91534	0.944297	0.00512843	0.00453916	0.00236989	7.33356	0.00109358	0.019636	0.0173798	0.00207344	0.0649107	0.00111607	0.0177372	0.054263	18.8525	1.6021	17.129	6.32034	1.91984	1.91984	0.0201532	0	0	0.0201532	0.979847	0.0205677	0	0	0	0.0332672	0.0785809	0.0653717	14.3002	3.82885	3.9076	189.987	0.00261417	-0.0742724	5.29815	8.46294	0.267749	0.472579	0.433888	0.127375	0.306513	0.038691
[truncated: 5 more columns]
